# Supplementary material
Source: Royal Society of Chemistry journal article supplement (doi:10.1039/d6cc01056c)
Supplement: d6cc01056c1.pdf [file d6cc01056c1.pdf]

# Supplementary Information

## Electrochemical ring-contraction synthesis of [60]fullerene-fused indanes from [60]fullerene-fused tetrahydroisoquinolines

Jian-Feng Li,<sup>a‡</sup> Wan-Qing Gao,<sup>b‡</sup> Zheng-Chun Yin,<sup>\*b</sup> Wen-Jie Qiu,<sup>a</sup> Xinmin Huang,<sup>a</sup>  
Ming-Wei Liu<sup>a</sup> and Guan-Wu Wang<sup>\*ab</sup>

<sup>a</sup>Department of Chemistry, University of Science and Technology of China, Hefei, Anhui 230026, P. R. China.

E-mail: [gwang@ustc.edu.cn](mailto:gwang@ustc.edu.cn)

<sup>b</sup>Key Laboratory of Functional Molecular Solids, Ministry of Education, Anhui Laboratory of Molecule-Based Materials and School of Chemistry and Materials Science, Anhui Normal University, Wuhu, Anhui 241002, P. R. China

E-mail: [zcyin@ahnu.edu.cn](mailto:zcyin@ahnu.edu.cn)

### Table of Contents

|                                                                                               |     |
|-----------------------------------------------------------------------------------------------|-----|
| 1. General information .....                                                                  | S2  |
| 2. CV diagrams of compounds <b>1a–h</b> .....                                                 | S3  |
| 3. Syntheses and spectral data of compounds <b>3aa–ha</b> .....                               | S7  |
| 4. X-ray crystallography of compound <b>3aa</b> .....                                         | S19 |
| 5. Control experiments.....                                                                   | S21 |
| 6. NMR spectra of compounds <b>3aa–ha</b> .....                                               | S23 |
| 7. UV–vis spectra of compounds <b>3aa–ha</b> .....                                            | S53 |
| 8. Cyclic voltammograms and differential pulse voltammograms of compounds <b>3aa–ha</b> ..... | S56 |
| 9. Device fabrication and photovoltaic parameters.....                                        | S72 |
| 10. References.....                                                                           | S74 |

## 1. General information

All electrochemical reactions were performed under argon (99.999%, containing 1.0 ppm of O<sub>2</sub> as determined by a trace oxygen analyzer) bubbling through a latex tube at 25 °C using a Shanghai Chenhua CHI630D workstation. Tetra-*n*-butylammonium perchlorate (TBAP) was recrystallized from absolute ethanol and dried in a vacuum at 50 °C prior to use. A conventional three-electrode cell was used for cyclic voltammetry (CV) and differential pulse voltammetry (DPV) measurements and consisted of a 2-mm diameter platinum disc working electrode, a platinum wire auxiliary electrode and a saturated calomel reference electrode (SCE). Controlled potential electrolysis (CPE) was carried out on a potentiostat/galvanostat using an “H”-type cell consisting of two platinum gauze electrodes (15 mm × 30 mm, serving as working and counter electrodes, respectively) and a SCE. The SCE was separated from the bulk of the solution by a fritted-glass bridge of low porosity, which contained the solvent/supporting electrolyte mixture. Compounds **1a-h** were synthesized according to the procedure developed by our group.<sup>1</sup> Other chemicals were purchased from commercial sources and used as received. <sup>1</sup>H NMR and <sup>13</sup>C NMR spectra were recorded on a Bruker ASCEND III-400 or a Bruker ASCEND III-500 spectrometer. <sup>1</sup>H NMR chemical shifts were determined relative to TMS ( $\delta$  0.00 ppm) or residual CHCl<sub>2</sub>CHCl<sub>2</sub> ( $\delta$  5.88 ppm). <sup>13</sup>C NMR chemical shifts were determined relative to TMS ( $\delta$  0.00 ppm) or residual CHCl<sub>2</sub>CHCl<sub>2</sub> ( $\delta$  72.86 ppm). Because CDCl<sub>2</sub>CDCl<sub>2</sub> was not available in the solvent library of either the Bruker ASCEND III-400 or the Bruker ASCEND III-500 spectrometer, CD<sub>2</sub>Cl<sub>2</sub> was selected as the closest alternative. Data for <sup>1</sup>H NMR and <sup>13</sup>C NMR are reported as follows: chemical shift ( $\delta$ , ppm), multiplicity (s = singlet, d = doublet, t = triplet, m = multiplet). High-resolution mass spectra were obtained on a Bruker UltrafleXtreme MALDI-TOF/TOF instrument. UV-vis spectra were obtained on a SHIMADZU UV-3600PLUS instrument.

CVs and DPVs of compounds **1** and **3**: Compounds **1** and **3** dissolved in anhydrous 1,2-dichlorobenzene (1,2-C<sub>6</sub>H<sub>4</sub>Cl<sub>2</sub>) solution containing 0.1 M TBAP under an argon atmosphere at room temperature. CV measurement was then undertaken at a scan rate of 50 mV s<sup>-1</sup>. The parameters of DPV: step potential: 4 mV; pulse amplitude: 50 mV; pulse duration: 0.05 s; pulse period: 0.5 s.

Synthesis of dianion **1**<sup>2-</sup>: 0.015 mmol of **1a-h** dissolved in 15 mL of anhydrous 1,2-C<sub>6</sub>H<sub>4</sub>Cl<sub>2</sub> solution containing 0.1 M TBAP were added into an “H”-type cell. After bubbling with Ar/O<sub>2</sub> through a latex tube for 20 min at 25 °C, the solution was electroreduced by CPE at -1.34, -1.36, -1.34, -1.33, -1.31, -1.36, -1.35 V and -1.34 V vs. SCE, respectively. When the theoretical number of coulombs (2.89 C) was reached, the electrolysis was terminated after ca. 2 h, and the solution of **1**<sup>2-</sup> was obtained.

Vis/NIR spectral measurement of the dianion of **1a**: 3.6 mg (3.6  $\mu$ mol) of **1a** was electroreduced by CPE at -1.34 V vs. SCE in 15 mL of anhydrous 1,2-C<sub>6</sub>H<sub>4</sub>Cl<sub>2</sub> solution containing 0.1 M TBAP under argon bubbling. The electrolysis was terminated when the theoretical number of coulombs required for a full conversion of **1a** to **1a**<sup>2-</sup> was reached. A dark brown-colored solution was obtained after the electrolysis, which is the typical color for C<sub>60</sub> anionic species with two electrons distributed on the fullerene

skeleton. The resulted solution was transferred to a 10-mm quartz cuvette under argon for the Vis/NIR measurement.

## 2. CV diagrams of compounds 1a–h

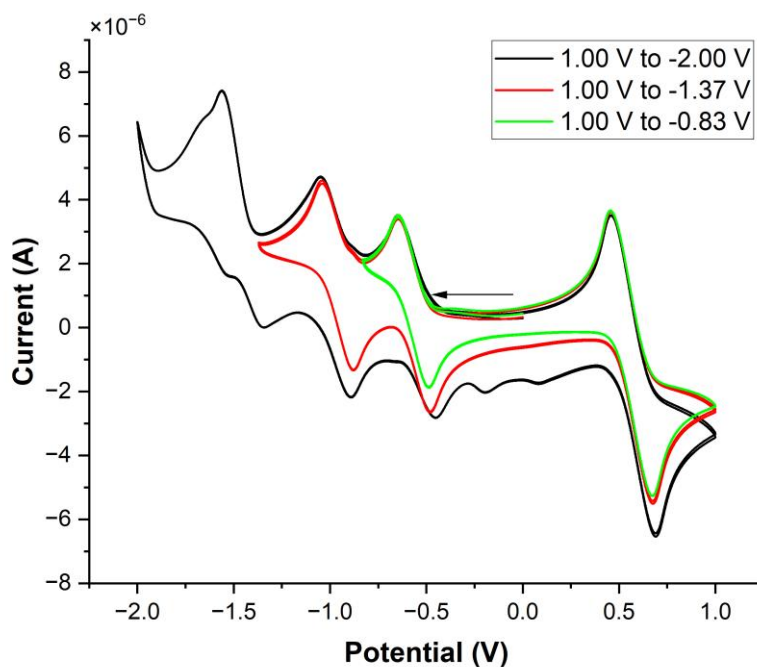

Fig. S1 CV of compound **1a** (scanning rate:  $50 \text{ mV s}^{-1}$ ).

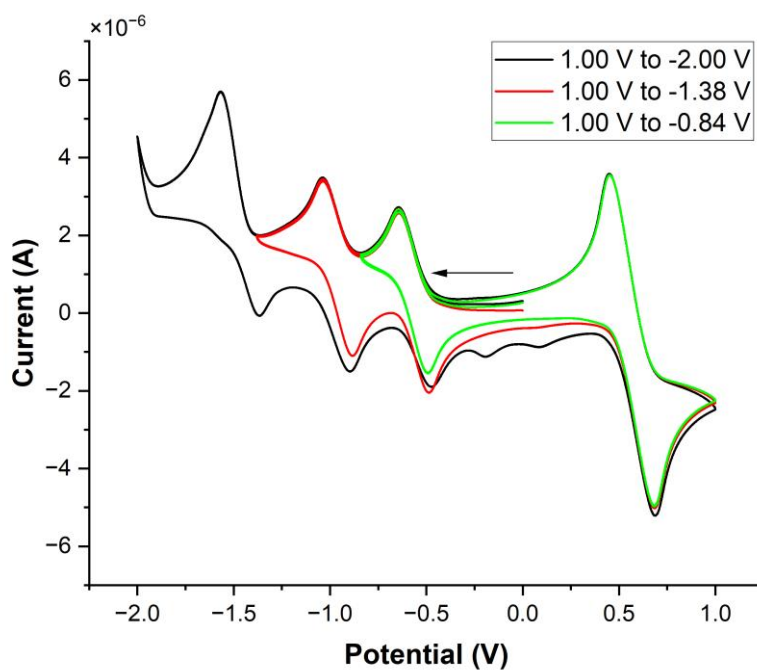

Fig. S2 CV of compound **1b** (scanning rate:  $50 \text{ mV s}^{-1}$ ).

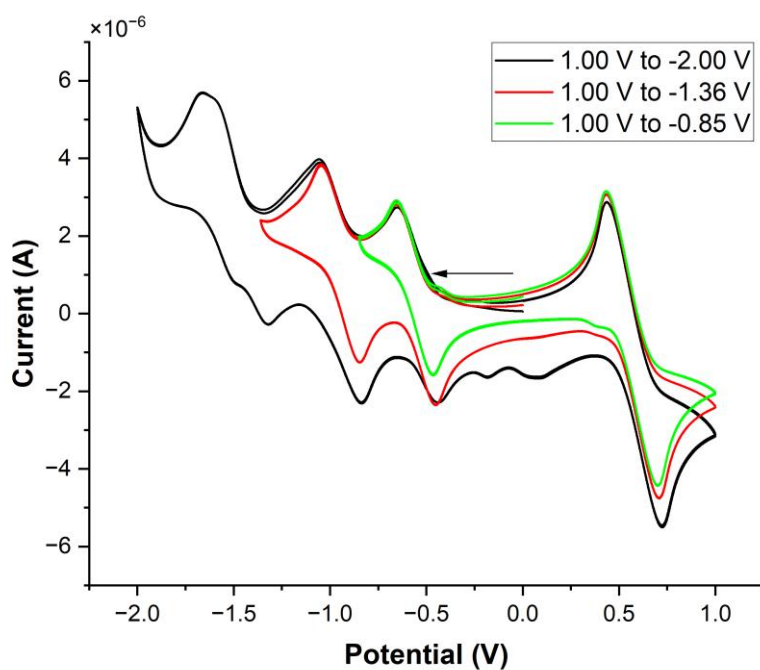

**Fig. S3** CV of compound **1c** (scanning rate:  $50 \text{ mV s}^{-1}$ ).

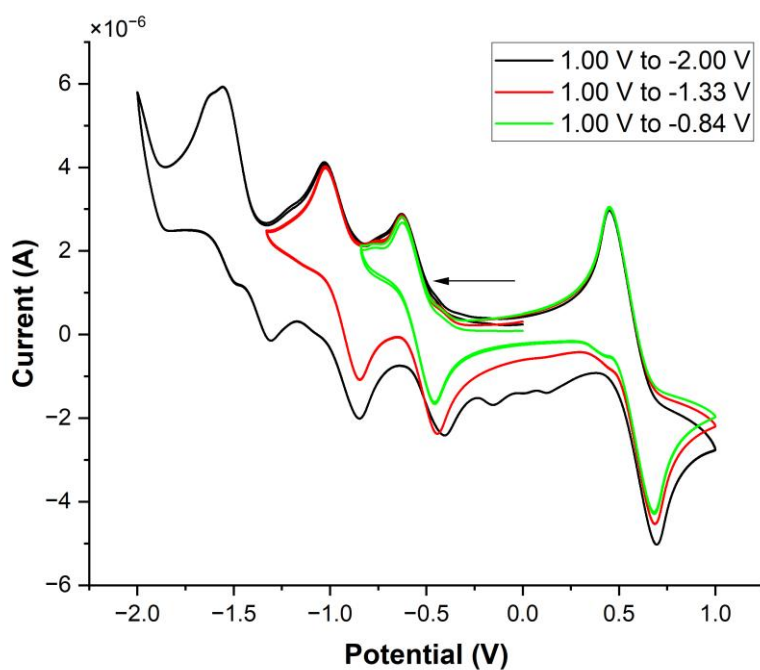

**Fig. S4** CV of compound **1d** (scanning rate:  $50 \text{ mV s}^{-1}$ ).

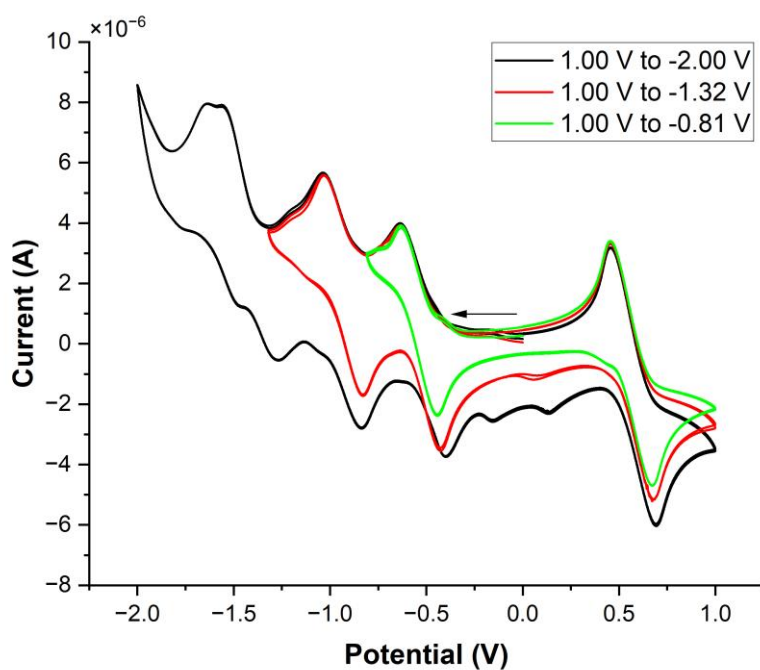

**Fig. S5** CV of compound **1e** (scanning rate: 50 mV s<sup>-1</sup>).

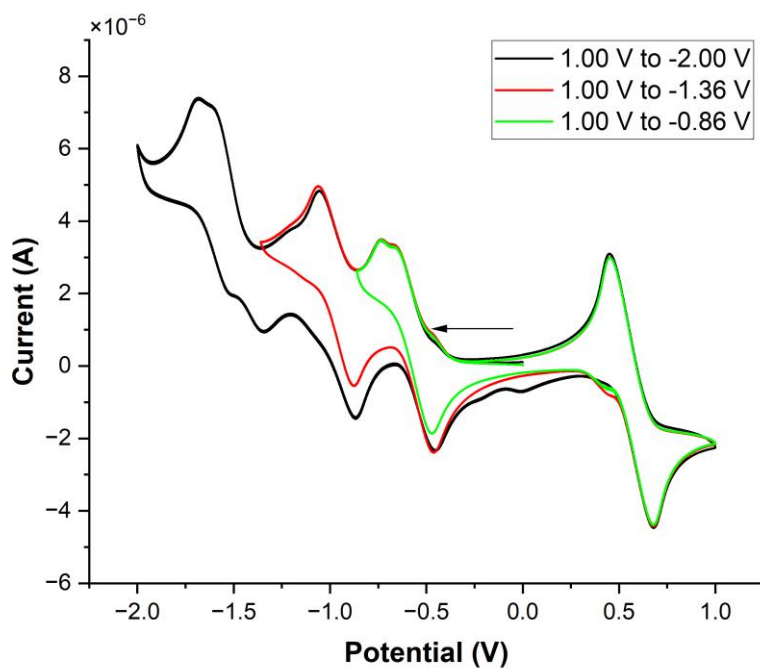

**Fig. S6** CV of compound **1f** (scanning rate: 50 mV s<sup>-1</sup>).

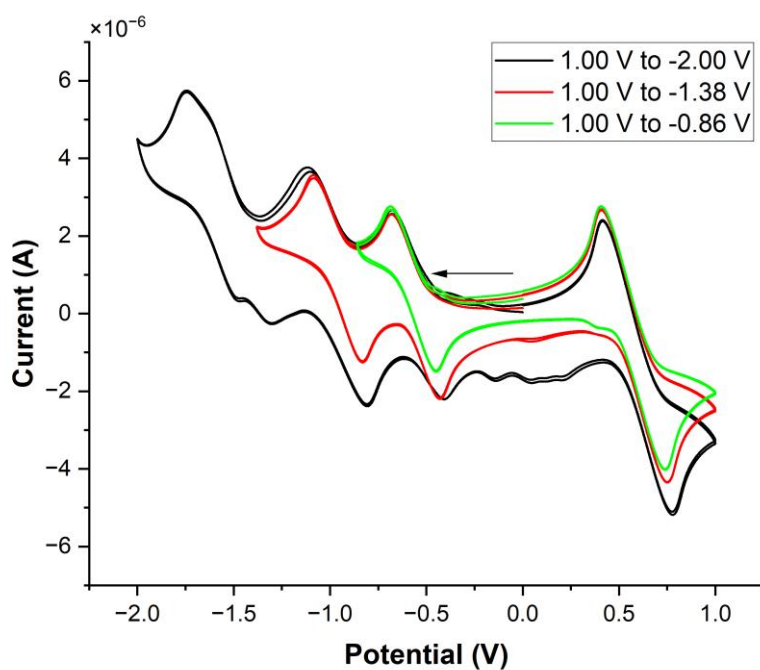

**Fig. S7** CV of compound **1g** (scanning rate:  $50 \text{ mV s}^{-1}$ ).

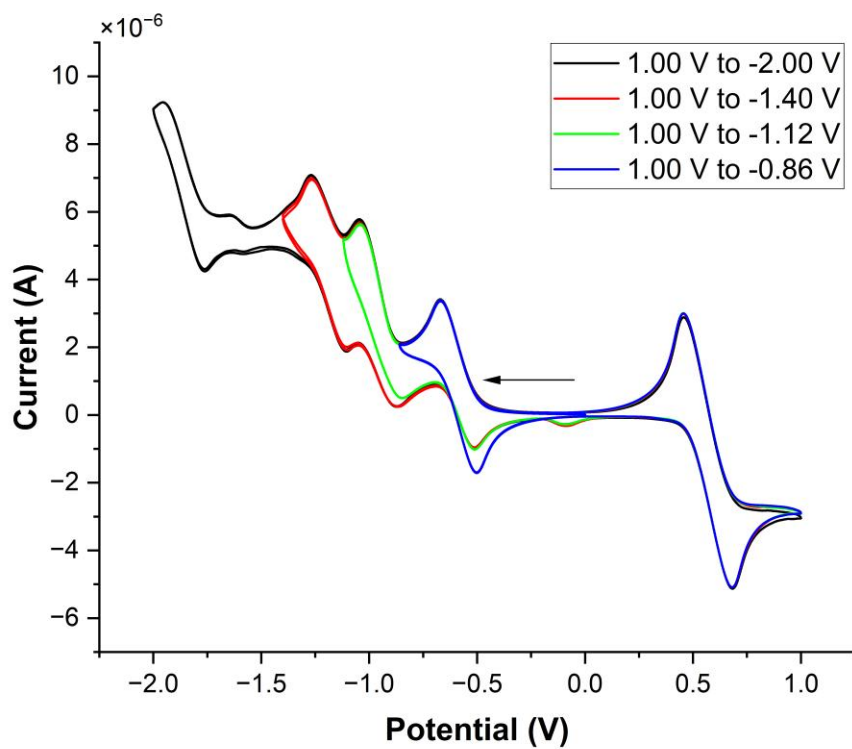

**Fig. S8** CV of compound **1h** (scanning rate:  $50 \text{ mV s}^{-1}$ ).

### 3. Syntheses and spectral data of compounds 3aa–ha

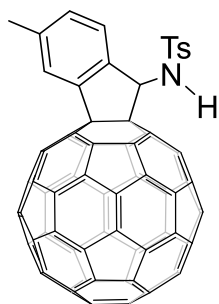

**3aa**

**Synthesis and spectral data of 3aa:** After the electrolysis of **1a** (14.9 mg, 0.015 mmol), the dianion **1a**<sup>2-</sup> was stirred at 70 °C for 3 h under Ar/O<sub>2</sub> bubbling through a latex tube, then trifluoroacetic acid (TFA, 3.4 μL, 0.045 mmol) was added, and the reaction was stirred at 25 °C for 15 min, the resulting mixture was directly filtered through a silica gel column (200–300 mesh) plug with CS<sub>2</sub>/ethyl acetate (5:1, v/v) to remove supporting electrolyte and insoluble materials, and then evaporated in vacuum to remove the solvent. Next, the residue was further separated on a silica gel column (300–400 mesh) with CS<sub>2</sub>/CH<sub>2</sub>Cl<sub>2</sub> (3:1, v/v) as the eluent to afford product **3aa** (9.9 mg, 66%) as an amorphous brown solid and the solubility of **3aa** in chloroform is 4.0 mg mL<sup>-1</sup>; <sup>1</sup>H NMR (400 MHz, 1:1 CS<sub>2</sub>/CDCl<sub>2</sub>CDCl<sub>2</sub>) δ 7.84 (s, 1H), 7.75 (d, *J* = 8.1 Hz, 2H), 7.57 (d, *J* = 7.9 Hz, 1H), 7.39 (d, *J* = 7.9 Hz, 1H), 7.11 (d, *J* = 8.1 Hz, 2H), 6.72 (d, *J* = 10.2 Hz, 1H), 5.77 (d, *J* = 10.2 Hz, 1H), 2.49 (s, 3H), 2.29 (s, 3H); <sup>13</sup>C NMR (101 MHz, 1:1 CS<sub>2</sub>/CDCl<sub>2</sub>CDCl<sub>2</sub>) (all 1C unless indicated) δ 154.84, 153.57, 152.19, 150.61, 146.28, 146.10, 145.33, 145.16, 145.10 (2C), 145.04, 144.98, 144.85 (4C), 144.46, 144.43, 144.29, 144.21, 144.13, 144.10, 144.06 (2C), 144.03 (2C), 143.99, 143.85, 143.32, 143.22, 143.16 (aryl C), 142.99 (2C), 141.88, 141.86, 141.49 (aryl C), 141.42, 141.40, 141.09 (2C), 140.99, 140.93, 140.89, 140.84, 140.80, 140.74, 140.56 (3C), 140.48, 140.41, 140.21, 140.01 (2C), 139.46, 139.28, 138.00 (aryl C), 136.90 (aryl C), 135.26 (aryl C), 135.19, 133.92, 133.48, 133.29, 130.19 (aryl C), 128.77 (2C, aryl C), 126.30 (2C, aryl C), 125.79 (aryl C), 125.09 (aryl C), 73.89 (sp<sup>3</sup>-C of C<sub>60</sub>), 67.46, 20.60, 20.52; UV-vis (CHCl<sub>3</sub>) λ<sub>max</sub>/nm (log ε) 257 (5.00), 311 (4.54), 431 (4.30), 699 (3.74) (the characteristic absorptions at approximately 430 nm and 700 nm in the UV-vis data are consistent with the literature<sup>2</sup>); MALDI-TOF MS *m/z* calcd for C<sub>75</sub>H<sub>15</sub>NO<sub>2</sub>S [M]<sup>-</sup> 993.0829, found 993.0836.

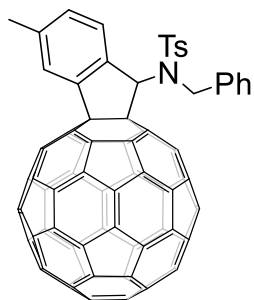

**3ab**

**Synthesis and spectral data of 3ab:** After the electrolysis of **1a** (14.9 mg, 0.015 mmol), the dianion **1a**<sup>2-</sup> was stirred at 70 °C for 3 h under Ar/O<sub>2</sub> bubbling through a latex tube,

then benzyl bromide (35.6  $\mu\text{L}$ , 0.300 mmol) was added, and the reaction was stirred at 25  $^{\circ}\text{C}$  for 2 h, the resulting mixture was directly filtered through a silica gel column (200–300 mesh) plug with  $\text{CS}_2$ /ethyl acetate (5:1, v/v) to remove supporting electrolyte and insoluble materials, and then evaporated in vacuum to remove the solvent. Next, the residue was further separated on a silica gel column (300–400 mesh) with  $\text{CS}_2$ / $\text{CH}_2\text{Cl}_2$  (2:1, v/v) as the eluent to afford product **3ab** (7.1 mg, 44%) as an amorphous brown solid;  $^1\text{H}$  NMR (500 MHz,  $\text{CDCl}_3$ )  $\delta$  7.95 (s, 1H), 7.79 (d,  $J$  = 8.1 Hz, 2H), 7.57 (s, 1H), 7.25 (d,  $J$  = 8.1 Hz, 2H), 7.21 (d,  $J$  = 8.0 Hz, 1H), 7.19–7.16 (m, 1H), 7.13–7.11 (m, 4H), 7.04 (d,  $J$  = 8.0 Hz, 1H), 4.99 (d,  $J$  = 15.4 Hz, 1H), 4.79 (d,  $J$  = 15.4 Hz, 1H), 2.53 (s, 3H), 2.43 (s, 3H);  $^{13}\text{C}$  NMR (126 MHz,  $\text{CDCl}_3$ ) (all 1C unless indicated)  $\delta$  156.82, 154.41, 153.92, 152.76, 147.45, 147.36 (2C), 146.32, 146.29, 146.25, 146.20, 146.16, 146.10, 146.05, 146.03, 145.99, 145.93, 145.83, 145.76, 145.51, 145.38, 145.34, 145.32 (2C), 145.23 (2C), 145.17 (2C), 144.62, 144.59, 144.43, 144.34, 143.87 (aryl C), 143.50 (aryl C), 143.09, 143.07, 142.72, 142.62 (2C), 142.58, 142.43, 142.41, 142.16, 142.07, 142.01, 141.99, 141.91, 141.88, 141.87, 141.80, 141.65, 141.31, 141.00 (aryl C), 140.55, 140.36, 139.40, 139.22, 138.18 (aryl C), 137.17, 136.62 (aryl C), 136.10, 134.29, 134.27, 133.87 (aryl C), 130.40 (aryl C), 129.86 (2C, aryl C), 129.61 (2C, aryl C), 128.21 (2C, aryl C), 127.75 (aryl C), 127.67 (2C, aryl C), 127.58 (aryl C), 126.47 (aryl C), 75.91 ( $\text{sp}^3$ -C of  $\text{C}_{60}$ ), 74.33, 74.26 ( $\text{sp}^3$ -C of  $\text{C}_{60}$ ), 50.63, 21.64 (2C); UV–vis ( $\text{CHCl}_3$ )  $\lambda_{\text{max}}/\text{nm}$  (log  $\epsilon$ ) 257 (4.97), 311 (4.52), 431 (4.13), 702 (3.27) (the characteristic absorptions at approximately 430 nm and 700 nm in the UV–vis data are consistent with the literature<sup>2</sup>); MALDI-TOF MS  $m/z$  calcd for  $\text{C}_{82}\text{H}_{21}\text{NO}_2\text{S} [\text{M}]^-$  1083.1298, found 1083.1305.

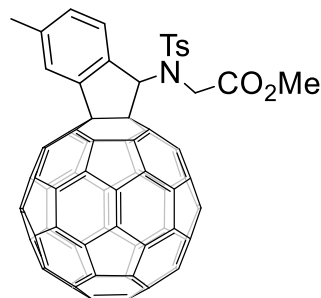

**3ac**

**Synthesis and spectral data of 3ac:** After the electrolysis of **1a** (14.9 mg, 0.015 mmol), the dianion **1a**<sup>2-</sup> was stirred at 70  $^{\circ}\text{C}$  for 3 h under Ar/ $\text{O}_2$  bubbling through a latex tube, then sodium hydride (NaH, 3.6 mg, 0.150 mmol) and methyl bromoacetate (28.4  $\mu\text{L}$ , 0.300 mmol) was added and the reaction was stirred at 25  $^{\circ}\text{C}$  for 2 h, the resulting mixture was directly filtered through a silica gel column (200–300 mesh) plug with  $\text{CS}_2$ /ethyl acetate (5:1, v/v) to remove supporting electrolyte and insoluble materials, and then evaporated in vacuum to remove the solvent. Next, the residue was further separated on a silica gel column (300–400 mesh) with  $\text{CS}_2$ / $\text{CH}_2\text{Cl}_2$  (2:1, v/v) as the eluent to afford product **3ac** (11.1 mg, 69%) as an amorphous brown solid;  $^1\text{H}$  NMR (400 MHz,  $\text{CDCl}_3$ )  $\delta$  8.08 (d,  $J$  = 8.1 Hz, 2H), 7.96 (s, 1H), 7.77 (d,  $J$  = 7.9 Hz, 1H), 7.45 (d,  $J$  = 7.9 Hz, 1H), 7.26 (s, 1H), 7.18 (d,  $J$  = 8.1 Hz, 2H), 4.54 (d,  $J$  = 17.9 Hz, 1H), 4.37 (d,  $J$  = 17.9 Hz, 1H), 3.66 (s, 3H), 2.56 (s, 3H), 2.34 (s, 3H);  $^{13}\text{C}$  NMR (101 MHz,  $\text{CDCl}_3$ ) (all 1C unless indicated)  $\delta$  169.37 (C=O), 156.32, 154.61, 153.84, 152.59, 147.87, 147.49, 147.35, 146.35, 146.33, 146.30, 146.24, 146.14, 146.09 (2C), 146.06 (2C), 145.74, 145.72, 145.67, 145.57, 145.34 (3C), 145.31 (2C), 145.25, 145.19, 145.00,

144.59 (aryl C), 144.56, 144.51, 144.39, 144.37, 143.33 (aryl C), 143.09, 143.07, 142.75, 142.70, 142.67, 142.61, 142.41, 142.31, 142.21, 142.06, 142.02 (2C), 141.84, 141.81 (3C), 141.55, 141.50 (aryl C), 141.33, 140.62, 140.54, 139.10, 139.06, 136.82 (aryl C), 136.28, 134.84, 134.67, 134.07, 133.51 (aryl C), 130.98 (aryl C), 129.60 (2C, aryl C), 129.08 (2C, aryl C), 127.55 (aryl C), 126.47 (aryl C), 74.96 (sp<sup>3</sup>-C of C<sub>60</sub>), 74.11 (sp<sup>3</sup>-C of C<sub>60</sub>), 73.80, 52.36, 47.46, 21.68, 21.67; UV-vis (CHCl<sub>3</sub>) λ<sub>max</sub>/nm (log ε) 257 (4.99), 310 (4.53), 431 (4.13), 699 (3.24) (the characteristic absorptions at approximately 430 nm and 700 nm in the UV-vis data are consistent with the literature<sup>2</sup>); MALDI-TOF MS m/z calcd for C<sub>78</sub>H<sub>19</sub>NO<sub>4</sub>S [M]<sup>-</sup> 1065.1040, found 1065.1048.

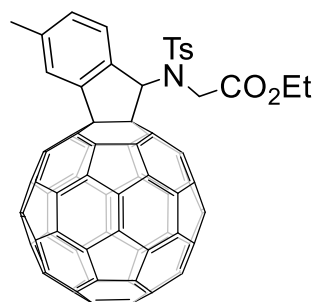

**3ad**

**Synthesis and spectral data of 3ad:** After the electrolysis of **1a** (14.9 mg, 0.015 mmol), the dianion **1a**<sup>2-</sup> was stirred at 70 °C for 3 h under Ar/O<sub>2</sub> bubbling through a latex tube, then NaH (3.6 mg, 0.150 mmol) and ethyl bromoacetate (33.3 μL, 0.300 mmol) was added and the reaction was stirred at 25 °C for 2 h, the resulting mixture was directly filtered through a silica gel column (200–300 mesh) plug with CS<sub>2</sub>/ethyl acetate (5:1, v/v) to remove supporting electrolyte and insoluble materials, and then evaporated in vacuum to remove the solvent. Next, the residue was further separated on a silica gel column (300–400 mesh) with CS<sub>2</sub>/CH<sub>2</sub>Cl<sub>2</sub> (2:1, v/v) as the eluent to afford product **3ad** (12.2 mg, 75%) as an amorphous brown solid; <sup>1</sup>H NMR (400 MHz, CDCl<sub>3</sub>) δ 8.09 (d, *J* = 8.1 Hz, 2H), 7.96 (s, 1H), 7.81 (d, *J* = 7.9 Hz, 1H), 7.46 (d, *J* = 7.9 Hz, 1H), 7.25 (s, 1H), 7.17 (d, *J* = 8.1 Hz, 2H), 4.52 (d, *J* = 17.9 Hz, 1H), 4.34 (d, *J* = 17.9 Hz, 1H) 4.20–4.04 (m, 2H), 2.56 (s, 3H), 2.33 (s, 3H), 1.24 (t, *J* = 7.2 Hz, 3H); <sup>13</sup>C NMR (101 MHz, CDCl<sub>3</sub>) (all 1C unless indicated) δ 168.86 (C=O), 156.30, 154.59, 153.82, 152.59, 147.86, 147.47, 147.32, 146.31, 146.30, 146.27, 146.21, 146.12, 146.06 (3C), 146.03, 145.70 (2C), 145.62, 145.57, 145.32, 145.31, 145.29, 145.27 (2C), 145.23, 145.16, 144.96, 144.56 (aryl C), 144.53, 144.50, 144.36, 144.34, 143.29 (aryl C), 143.08, 143.04, 142.73, 142.67, 142.64, 142.58, 142.39, 142.28, 142.19, 142.02, 142.00, 141.99, 141.82, 141.78 (2C), 141.77, 141.51, 141.46 (aryl C), 141.34, 140.60, 140.51, 139.04 (2C), 136.77 (aryl C), 136.25, 134.86, 134.64, 134.02, 133.56 (aryl C), 130.99 (aryl C), 129.56 (2C, aryl C), 129.13 (2C, aryl C), 127.59 (aryl C), 126.42 (aryl C), 74.91 (sp<sup>3</sup>-C of C<sub>60</sub>), 74.08 (sp<sup>3</sup>-C of C<sub>60</sub>), 73.74, 61.47, 47.58, 21.67 (2C), 14.21; UV-vis (CHCl<sub>3</sub>) λ<sub>max</sub>/nm (log ε) 257 (5.00), 311 (4.55), 431 (4.18), 703 (2.60) (the characteristic absorptions at approximately 430 nm and 700 nm in the UV-vis data are consistent with the literature<sup>2</sup>); MALDI-TOF MS m/z calcd for C<sub>79</sub>H<sub>21</sub>NO<sub>4</sub>S [M]<sup>-</sup> 1079.1197, found 1079.1208.

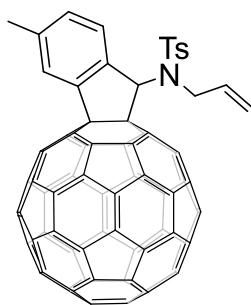

**3ae**

**Synthesis and spectral data of 3ae:** After the electrolysis of **1a** (14.9 mg, 0.015 mmol), the dianion **1a**<sup>2-</sup> was stirred at 70 °C for 3 h under Ar/O<sub>2</sub> bubbling through a latex tube, then allyl bromide (26.0 μL, 0.300 mmol) was added and the reaction was stirred at 25 °C for 2 h, the resulting mixture was directly filtered through a silica gel column (200–300 mesh) plug with CS<sub>2</sub>/ethyl acetate (5:1, v/v) to remove supporting electrolyte and insoluble materials, and then evaporated in vacuum to remove the solvent. Next, the residue was further separated on a silica gel column (300–400 mesh) with CS<sub>2</sub>/CH<sub>2</sub>Cl<sub>2</sub> (3:1, v/v) as the eluent to afford product **3ae** (7.9 mg, 51%) as an amorphous brown solid; <sup>1</sup>H NMR (400 MHz, CDCl<sub>3</sub>) δ 7.97 (s, 1H), 7.93 (d, *J* = 8.2 Hz, 2H), 7.45 (s, 1H), 7.36 (d, *J* = 7.9 Hz, 1H), 7.30 (d, *J* = 8.2 Hz, 2H), 7.24 (d, *J* = 7.9 Hz, 1H), 5.78–5.66 (m, 1H), 5.13 (dd, *J* = 17.1, 1.3 Hz, 1H), 5.05 (dd, *J* = 10.1, 1.3 Hz, 1H), 4.30 (d, *J* = 6.7 Hz, 2H), 2.54 (s, 3H), 2.44 (s, 3H); <sup>13</sup>C NMR (101 MHz, CDCl<sub>3</sub>) (all 1C unless indicated) δ 156.62, 154.56, 154.05, 153.25, 147.47, 147.43, 147.39, 146.36, 146.33, 146.30, 146.21, 146.13 (2C), 146.11, 146.09, 146.02, 145.96, 145.80, 145.78, 145.68, 145.58, 145.38, 145.36, 145.33 (2C), 145.25 (2C), 145.21, 144.66, 144.58, 144.45, 144.40, 143.88 (aryl C), 143.51 (aryl C), 143.14, 143.11, 142.73, 142.68, 142.67, 142.62, 142.43, 142.38, 142.23, 142.13, 142.08, 142.07, 142.03, 141.93, 141.85, 141.74 (2C), 141.38, 141.18 (aryl C), 140.62, 140.50, 139.56, 139.48, 138.49 (aryl C), 136.82, 135.48, 134.61 (aryl C), 134.57, 134.43 (CH<sub>2</sub>CH=CH<sub>2</sub>), 134.33, 130.62 (aryl C), 129.80 (2C, aryl C), 127.88 (2C, aryl C), 127.18 (aryl C), 126.56 (aryl C), 118.49 (CH<sub>2</sub>CH=CH<sub>2</sub>), 75.90 (sp<sup>3</sup>-C of C<sub>60</sub>), 74.23, 74.17 (sp<sup>3</sup>-C of C<sub>60</sub>), 50.40, 21.67, 21.66; UV–vis (CHCl<sub>3</sub>) λ<sub>max</sub>/nm (log ε) 257 (4.96), 311 (4.52), 431 (4.15), 700 (2.64) (the characteristic absorptions at approximately 430 nm and 700 nm in the UV–vis data are consistent with the literature<sup>2</sup>); MALDI-TOF MS *m/z* calcd for C<sub>78</sub>H<sub>19</sub>NO<sub>2</sub>S [M]<sup>-</sup> 1033.1142, found 1033.1154.

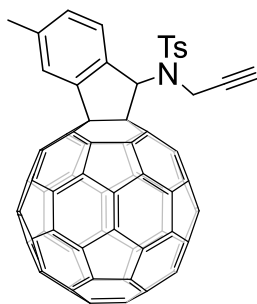

**3af**

**Synthesis and spectral data of 3af:** After the electrolysis of **1a** (14.9 mg, 0.015 mmol), the dianion **1a**<sup>2-</sup> was stirred at 70 °C for 3 h under Ar/O<sub>2</sub> bubbling through a latex tube,

then propargyl bromide (25.9  $\mu\text{L}$ , 0.300 mmol) was added and the reaction was stirred at 25  $^{\circ}\text{C}$  for 2 h, the resulting mixture was directly filtered through a silica gel column (200–300 mesh) plug with  $\text{CS}_2$ /ethyl acetate (5:1, v/v) to remove supporting electrolyte and insoluble materials, and then evaporated in vacuum to remove the solvent. Next, the residue was further separated on a silica gel column (300–400 mesh) with  $\text{CS}_2$ / $\text{CH}_2\text{Cl}_2$  (3:1, v/v) as the eluent to afford product **3af** (6.5 mg, 42%) as an amorphous brown solid;  $^1\text{H}$  NMR (500 MHz,  $\text{CDCl}_3$ )  $\delta$  8.05 (d,  $J = 8.3$  Hz, 2H), 7.97 (s, 1H), 7.44 (d,  $J = 7.9$  Hz, 1H), 7.39 (d,  $J = 7.9$  Hz, 1H), 7.38 (s, 1H), 7.27 (d,  $J = 8.3$  Hz, 2H), 4.51 (dd,  $J = 18.0, 2.4$  Hz, 1H), 4.47 (dd,  $J = 18.0, 2.4$  Hz, 1H), 2.52 (s, 3H), 2.42 (s, 3H), 2.18 (t,  $J = 2.4$  Hz, 1H);  $^{13}\text{C}$  NMR (101 MHz,  $\text{CDCl}_3$ ) (all 1C unless indicated)  $\delta$  156.43, 154.66, 153.75, 152.63, 147.56, 147.50, 147.38, 146.35, 146.33, 146.32, 146.22, 146.13 (2C), 146.10 (2C), 146.04, 145.85, 145.78, 145.72, 145.67, 145.53, 145.35 (2C), 145.33, 145.30, 145.28, 145.22 (2C), 144.63, 144.52, 144.42, 144.40, 144.23 (aryl C), 143.34 (aryl C), 143.11, 143.10, 142.72, 142.68, 142.66, 142.62, 142.43, 142.34, 142.26, 142.09, 142.08, 142.03, 141.94, 141.84, 141.80, 141.76, 141.74, 141.59, 141.43 (aryl C), 140.62, 140.51, 139.42, 139.40, 137.68 (aryl C), 136.89, 135.09, 134.79, 134.31, 133.27 (aryl C), 130.75 (aryl C), 129.66 (2C, aryl C), 128.25 (2C, aryl C), 127.62 (aryl C), 126.52 (aryl C), 79.28 ( $\text{CH}_2\text{C}\equiv\text{CH}$ ), 75.44 ( $\text{sp}^3\text{-C}$  of  $\text{C}_{60}$ ), 74.12, 74.10 ( $\text{sp}^3\text{-C}$  of  $\text{C}_{60}$ ), 73.15 ( $\text{CH}_2\text{C}\equiv\text{CH}$ ), 36.20, 21.70, 21.69; UV-vis ( $\text{CHCl}_3$ )  $\lambda_{\text{max}}/\text{nm}$  (log  $\epsilon$ ) 257 (4.99), 311 (4.54), 431 (4.16), 698 (2.59) (the characteristic absorptions at approximately 430 nm and 700 nm in the UV-vis data are consistent with the literature<sup>2</sup>); MALDI-TOF MS  $m/z$  calcd for  $\text{C}_{78}\text{H}_{17}\text{NO}_2\text{S}$  [ $\text{M}$ ]<sup>-</sup> 1031.0985, found 1031.0995.

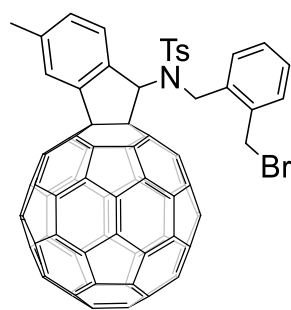

**3ag**

**Synthesis and spectral data of 3ag:** After the electrolysis of **1a** (14.9 mg, 0.015 mmol), the dianion **1a**<sup>2-</sup> was stirred at 70  $^{\circ}\text{C}$  for 3 h under Ar/ $\text{O}_2$  bubbling through a latex tube, then 1,2-bis(bromomethyl) benzene (40.4  $\mu\text{L}$ , 0.300 mmol) was added and the reaction was stirred at 25  $^{\circ}\text{C}$  for 2 h, the resulting mixture was directly filtered through a silica gel column (200–300 mesh) plug with  $\text{CS}_2$ /ethyl acetate (5:1, v/v) to remove supporting electrolyte and insoluble materials, and then evaporated in vacuum to remove the solvent. Next, the residue was further separated on a silica gel column (300–400 mesh) with  $\text{CS}_2$ / $\text{CH}_2\text{Cl}_2$  (2:1, v/v) as the eluent to afford product **3ag** (8.9 mg, 50%) as an amorphous brown solid;  $^1\text{H}$  NMR (400 MHz,  $\text{CDCl}_3$ )  $\delta$  7.99 (d,  $J = 8.0$  Hz, 2H), 7.94 (s, 1H), 7.55 (s, 1H), 7.44 (d,  $J = 8.0$  Hz, 2H), 7.32 (d,  $J = 7.9$  Hz, 1H), 7.21 (d,  $J = 7.5$  Hz, 1H), 7.16 (t,  $J = 7.5$  Hz, 1H), 6.99 (t,  $J = 7.6$  Hz, 1H), 6.81 (d,  $J = 7.6$  Hz, 1H), 6.76 (d,  $J = 7.9$  Hz, 1H), 5.21 (d,  $J = 15.5$  Hz, 1H), 4.73 (d,  $J = 15.5$  Hz, 1H), 4.68 (d,  $J = 10.4$  Hz, 1H), 4.16 (d,  $J = 10.4$  Hz, 1H), 2.55 (s, 3H), 2.54 (s, 3H);  $^{13}\text{C}$  NMR (101 MHz,  $\text{CDCl}_3$ ) (all 1C unless indicated)  $\delta$  156.82, 154.12, 153.38, 152.23, 147.48, 147.45,

147.37, 146.50, 146.31, 146.28, 146.16, 146.14, 146.09, 146.04, 146.02, 145.97, 145.85, 145.82, 145.58, 145.44, 145.40, 145.31, 145.28, 145.23 (4C), 145.16, 144.68, 144.60, 144.42 (2C), 144.33 (aryl C), 144.14 (aryl C), 143.08, 143.04, 142.69, 142.60, 142.56 (2C), 142.46, 142.45, 142.15, 142.00, 141.96, 141.94, 141.90 (2C), 141.86, 141.64, 141.57, 141.23 (aryl C), 141.00, 140.52, 140.17, 139.44, 139.21, 137.50 (aryl C), 137.30, 136.99 (aryl C), 136.21, 134.66 (aryl C), 134.57, 134.20, 133.06 (aryl C), 131.53 (aryl C), 130.67 (aryl C), 130.49 (aryl C), 130.26 (2C, aryl C), 128.90 (aryl C), 128.64 (aryl C), 127.82 (2C, aryl C), 127.31 (aryl C), 126.76 (aryl C), 75.88 (sp<sup>3</sup>-C of C<sub>60</sub>), 74.82, 73.93 (sp<sup>3</sup>-C of C<sub>60</sub>), 46.39, 31.61, 21.75, 21.64; UV-vis (CHCl<sub>3</sub>) λ<sub>max</sub>/nm (log ε) 257 (5.00), 311 (4.54), 430 (4.30), 698 (3.75) (the characteristic absorptions at approximately 430 nm and 700 nm in the UV-vis data are consistent with the literature<sup>2</sup>); MALDI-TOF MS m/z calcd for C<sub>83</sub>H<sub>22</sub>NO<sub>2</sub>S<sup>79</sup>Br [M]<sup>-</sup> 1175.0560, found 1175.0569.

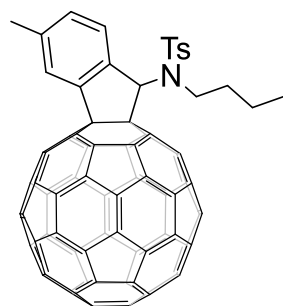

**3ah**

**Synthesis and spectral data of 3ah:** After the electrolysis of **1a** (14.9 mg, 0.015 mmol), the dianion **1a**<sup>2-</sup> was stirred at 70 °C for 3 h under Ar/O<sub>2</sub> bubbling through a latex tube, then *n*-butyl iodide (85.4 μL, 0.750 mmol) was added and the reaction was stirred at 70 °C for 1 h, the resulting mixture was directly filtered through a silica gel column (200–300 mesh) plug with CS<sub>2</sub>/ethyl acetate (5:1, v/v) to remove supporting electrolyte and insoluble materials, and then evaporated in vacuum to remove the solvent. Next, the residue was further separated on a silica gel column (300–400 mesh) with CS<sub>2</sub>/CH<sub>2</sub>Cl<sub>2</sub> (4:1, v/v) as the eluent to afford product **3ah** (9.7 mg, 62%) as an amorphous brown solid and the solubility of **3ah** in chloroform is 53.8 mg mL<sup>-1</sup>; <sup>1</sup>H NMR (500 MHz, 1:1 CS<sub>2</sub>/CDCl<sub>2</sub>CDCl<sub>2</sub>) δ 7.87 (s, 1H), 7.80 (d, *J* = 8.0 Hz, 2H), 7.29 (d, *J* = 8.1 Hz, 1H), 7.25 (s, 1H), 7.23 (d, *J* = 8.1 Hz, 1H), 7.19 (d, *J* = 8.0 Hz, 2H), 3.59–3.49 (m, 1H), 3.44–3.35 (m, 1H), 2.47 (s, 3H), 2.33 (s, 3H), 1.68–1.56 (m, 2H), 1.12–0.99 (m, 2H), 0.69 (tt, *J* = 7.4, 1.5 Hz, 3H); <sup>13</sup>C NMR (126 MHz, CDCl<sub>3</sub>) (all 1C unless indicated) δ 156.74, 154.74, 154.14, 153.22, 147.46, 147.39, 147.36, 146.34, 146.31, 146.30, 146.21, 146.10 (3C), 146.02, 146.00, 145.88, 145.80 (2C), 145.71, 145.53, 145.35 (2C), 145.32, 145.25 (2C), 145.20, 145.17, 144.62, 144.55, 144.44, 144.41, 143.84 (aryl C), 143.26 (aryl C), 143.13, 143.10, 142.73, 142.67 (2C), 142.62, 142.39, 142.34, 142.23, 142.14, 142.07, 142.03 (2C), 141.83, 141.80, 141.75, 141.64, 141.28, 141.02 (aryl C), 140.60, 140.51, 139.38, 139.25, 138.64 (aryl C), 136.61, 135.31, 134.73 (aryl C), 134.54, 134.19, 130.59 (aryl C), 129.86 (2C, aryl C), 127.69 (2C, aryl C), 127.17 (aryl C), 126.47 (aryl C), 75.69 (sp<sup>3</sup>-C of C<sub>60</sub>), 74.47, 74.25 (sp<sup>3</sup>-C of C<sub>60</sub>), 47.98, 32.20, 21.66, 21.64, 20.63, 13.65; UV-vis (CHCl<sub>3</sub>) λ<sub>max</sub>/nm (log ε) 257 (5.02), 311 (4.56), 431 (4.32), 701 (3.76) (the characteristic absorptions at approximately 430 nm and 700 nm in the UV-vis data are consistent with the

literature<sup>2</sup>); MALDI-TOF MS  $m/z$  calcd for  $C_{79}H_{23}NO_2S$   $[M]^-$  1049.1455, found 1049.1450.

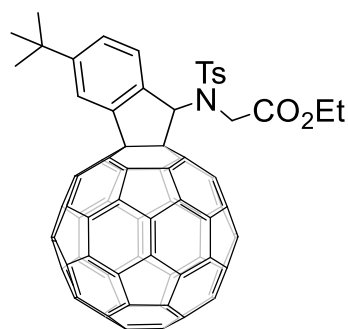

**3bd**

**Synthesis and spectral data of 3bd:** After the electrolysis of **1b** (15.5 mg, 0.015 mmol), the dianion **1b**<sup>2-</sup> was stirred at 70 °C for 3 h under Ar/O<sub>2</sub> bubbling through a latex tube, then NaH (3.6 mg, 0.150 mmol) and ethyl bromoacetate (33.3  $\mu$ L, 0.300 mmol) was added and the reaction was stirred at 25 °C for 2 h, the resulting mixture was directly filtered through a silica gel column (200–300 mesh) plug with CS<sub>2</sub>/ethyl acetate (5:1, v/v) to remove supporting electrolyte and insoluble materials, and then evaporated in vacuum to remove the solvent. Next, the residue was further separated on a silica gel column (300–400 mesh) with CS<sub>2</sub>/CH<sub>2</sub>Cl<sub>2</sub> (2:1, v/v) as the eluent to afford product **3bd** (11.5 mg, 68%) as an amorphous brown solid; <sup>1</sup>H NMR (400 MHz, CDCl<sub>3</sub>)  $\delta$  8.12 (s, 1H), 8.10 (d,  $J$  = 8.0 Hz, 2H), 7.83 (d,  $J$  = 8.2 Hz, 1H), 7.69 (d,  $J$  = 8.2 Hz, 1H), 7.25 (s, 1H), 7.18 (d,  $J$  = 8.0 Hz, 2H), 4.54 (d,  $J$  = 18.0 Hz, 1H), 4.36 (d,  $J$  = 18.0 Hz, 1H), 4.20–4.04 (m, 2H), 2.34 (s, 3H), 1.45 (s, 9H), 1.24 (t,  $J$  = 7.1 Hz, 3H); <sup>13</sup>C NMR (101 MHz, CDCl<sub>3</sub>) (all 1C unless indicated)  $\delta$  168.89 (C=O), 156.45, 154.90 (aryl C), 154.74, 153.93, 152.68, 147.96, 147.48, 147.34, 146.33, 146.31, 146.28, 146.23, 146.13, 146.08 (3C), 146.05, 145.73 (2C), 145.65, 145.54, 145.33 (2C), 145.31 (3C), 145.24, 145.18, 144.96, 144.57, 144.55 (aryl C), 144.53, 144.38, 144.35, 143.11, 143.07, 142.90 (aryl C), 142.75, 142.69, 142.65, 142.60, 142.42, 142.31, 142.21, 142.03 (3C), 141.83 (2C), 141.80, 141.79, 141.54, 141.37, 140.68, 140.59, 139.08 (2C), 136.80 (aryl C), 136.31, 134.90, 134.75, 134.06, 133.57 (aryl C), 129.56 (2C, aryl C), 129.16 (2C, aryl C), 127.64 (aryl C), 127.33 (aryl C), 122.36 (aryl C), 75.00 (sp<sup>3</sup>-C of C<sub>60</sub>), 74.39 (sp<sup>3</sup>-C of C<sub>60</sub>), 73.76, 61.45, 47.67, 35.34, 31.52 (3C), 21.67, 14.25; UV-vis (CHCl<sub>3</sub>)  $\lambda_{max}/nm$  (log  $\epsilon$ ) 257 (4.99), 310 (4.51), 431 (4.17), 701 (3.38) (the characteristic absorptions at approximately 430 nm and 700 nm in the UV-vis data are consistent with the literature<sup>2</sup>); MALDI-TOF MS  $m/z$  calcd for  $C_{82}H_{27}NO_4S$   $[M]^-$  1121.1666, found 1121.1658.

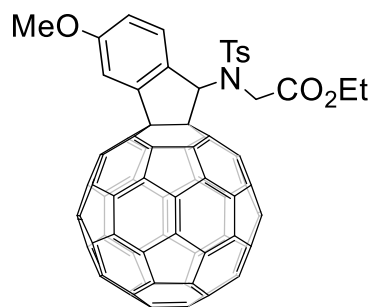

**3cd**

**Synthesis and spectral data of 3cd:** After the electrolysis of **1c** (15.1 mg, 0.015 mmol), the dianion **1c**<sup>2-</sup> was stirred at 100 °C for 3 h under Ar/O<sub>2</sub> bubbling through a latex tube, then NaH (3.6 mg, 0.150 mmol) and ethyl bromoacetate (33.3 μL, 0.300 mmol) was added and the reaction was stirred at 25 °C for 2 h, the resulting mixture was directly filtered through a silica gel column (200–300 mesh) plug with CS<sub>2</sub>/ethyl acetate (5:1, v/v) to remove supporting electrolyte and insoluble materials, and then evaporated in vacuum to remove the solvent. Next, the residue was further separated on a silica gel column (300–400 mesh) with CS<sub>2</sub>/CH<sub>2</sub>Cl<sub>2</sub> (2:1, v/v) as the eluent to afford product **3cd** (7.3 mg, 45%) as an amorphous brown solid; <sup>1</sup>H NMR (500 MHz, CDCl<sub>3</sub>) δ 8.09 (d, *J* = 8.1 Hz, 2H), 7.82 (d, *J* = 8.6 Hz, 1H), 7.61 (d, *J* = 2.4 Hz, 1H), 7.21 (s, 1H), 7.20 (dd, *J* = 8.6, 2.4 Hz, 1H), 7.18 (d, *J* = 8.1 Hz, 2H), 4.52 (d, *J* = 17.9 Hz, 1H), 4.37 (d, *J* = 17.9 Hz, 1H), 4.19–4.06 (m, 2H), 3.95 (s, 3H), 2.34 (s, 3H), 1.25 (t, *J* = 7.2 Hz, 3H); <sup>13</sup>C NMR (126 MHz, CDCl<sub>3</sub>) (all 1C unless indicated) δ 168.90 (C=O), 162.29 (aryl C), 156.14, 154.30, 153.66, 152.55, 147.83, 147.48, 147.36, 146.34, 146.32, 146.30, 146.22, 146.13, 146.08 (2C), 146.04, 145.93, 145.71 (2C), 145.61, 145.54, 145.38, 145.35, 145.33, 145.32, 145.30, 145.25, 145.17, 145.01, 144.82 (aryl C), 144.55, 144.53, 144.51 (2C), 144.35 (aryl C), 143.10, 143.06, 142.75, 142.69, 142.66, 142.60, 142.42, 142.31, 142.15, 142.02 (2C), 141.99, 141.85, 141.78 (2C), 141.76, 141.54, 141.35, 140.64, 140.54, 139.11, 139.08, 136.89 (aryl C), 136.23, 135.01, 134.68, 134.03, 129.57 (2C, aryl C), 129.10 (2C, aryl C), 128.88 (aryl C), 127.83 (aryl C), 117.23 (aryl C), 109.95 (aryl C), 75.22 (sp<sup>3</sup>-C of C<sub>60</sub>), 74.06 (sp<sup>3</sup>-C of C<sub>60</sub>), 73.45, 61.47, 55.86, 47.42, 21.66, 14.23; UV-vis (CHCl<sub>3</sub>) λ<sub>max</sub>/nm (log ε) 256 (5.00), 311 (4.53), 431 (4.13), 701 (2.52) (the characteristic absorptions at approximately 430 nm and 700 nm in the UV-vis data are consistent with the literature<sup>2</sup>); MALDI-TOF MS *m/z* calcd for C<sub>79</sub>H<sub>21</sub>NO<sub>5</sub>S [M]<sup>-</sup> 1095.1146, found 1095.1135.

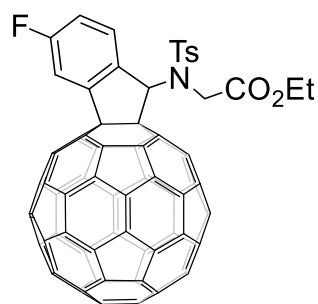

**3dd**

**Synthesis and spectral data of 3dd:** After the electrolysis of **1d** (15.0 mg, 0.015 mmol), the dianion **1d**<sup>2-</sup> was stirred at 100 °C for 3 h under Ar/O<sub>2</sub> bubbling through a latex tube,

then NaH (3.6 mg, 0.150 mmol) and ethyl bromoacetate (33.3  $\mu$ L, 0.300 mmol) was added and the reaction was stirred at 25 °C for 2 h, the resulting mixture was directly filtered through a silica gel column (200–300 mesh) plug with CS<sub>2</sub>/ethyl acetate (5:1, v/v) to remove supporting electrolyte and insoluble materials, and then evaporated in vacuum to remove the solvent. Next, the residue was further separated on a silica gel column (300–400 mesh) with CS<sub>2</sub>/CH<sub>2</sub>Cl<sub>2</sub> (2:1, v/v) as the eluent to afford product **3dd** (9.9 mg, 61%) as an amorphous brown solid; <sup>1</sup>H NMR (500 MHz, CDCl<sub>3</sub>)  $\delta$  8.06 (d,  $J$  = 8.2 Hz, 2H), 7.92 (dd,  $J$  = 8.6, 5.0 Hz, 1H), 7.82 (dd,  $J$  = 8.2, 2.5 Hz, 1H), 7.33 (td,  $J$  = 8.5, 2.5 Hz, 1H), 7.21 (s, 1H), 7.17 (d,  $J$  = 8.2 Hz, 2H), 4.49 (d,  $J$  = 17.9 Hz, 1H), 4.35 (d,  $J$  = 17.9 Hz, 1H), 4.21–4.05 (m, 2H), 2.34 (s, 3H), 1.25 (t,  $J$  = 7.2 Hz, 3H); <sup>13</sup>C NMR (126 MHz, 1:1 CS<sub>2</sub>/CDCl<sub>3</sub>) (all 1C unless indicated)  $\delta$  168.55 (C=O), 164.77 (aryl C, d,  $J_{C-F}$  = 251.2 Hz), 155.66, 153.65, 153.00, 151.99, 147.58, 147.47, 147.34, 146.35, 146.33, 146.31, 146.23, 146.12, 146.08, 146.07, 146.04, 145.70, 145.59 (2C), 145.52 (aryl C, d,  $J_{C-F}$  = 8.1 Hz), 145.51, 145.46, 145.40, 145.31 (2C), 145.26, 145.21, 145.18, 145.15, 145.02, 144.50, 144.48 (3C), 144.30 (aryl C), 143.09, 143.05, 142.76, 142.70, 142.66, 142.60, 142.38, 142.27, 142.03, 141.99, 141.97, 141.89, 141.81 (2C), 141.79, 141.74, 141.52, 141.28, 140.70, 140.61, 139.10, 139.06, 136.80 (aryl C), 136.16, 135.07, 134.72, 133.93, 132.07 (aryl C, d,  $J_{C-F}$  = 2.3 Hz), 129.76 (aryl C, d,  $J_{C-F}$  = 9.0 Hz), 129.55 (2C, aryl C), 129.08 (2C, aryl C), 117.59 (aryl C, d,  $J_{C-F}$  = 23.1 Hz), 112.75 (aryl C, d,  $J_{C-F}$  = 23.2 Hz), 75.05 (sp<sup>3</sup>-C of C<sub>60</sub>), 73.69 (sp<sup>3</sup>-C of C<sub>60</sub>), 73.12, 61.49, 47.49, 21.65, 14.22; UV–vis (CHCl<sub>3</sub>)  $\lambda_{\max}$ /nm (log  $\epsilon$ ) 257 (4.99), 312 (4.51), 431 (4.18), 701 (3.39) (the characteristic absorptions at approximately 430 nm and 700 nm in the UV–vis data are consistent with the literature<sup>2</sup>); MALDI-TOF MS  $m/z$  calcd for C<sub>78</sub>H<sub>18</sub>FNO<sub>4</sub>S [M]<sup>–</sup> 1083.0946, found 1083.0934.

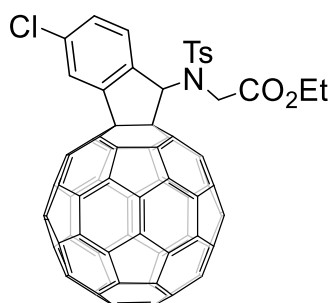

**3ed**

**Synthesis and spectral data of 3ed:** After the electrolysis of **1e** (15.2 mg, 0.015 mmol), the dianion **1e**<sup>2–</sup> was stirred at 110 °C for 3 h under Ar/O<sub>2</sub> bubbling through a latex tube, then NaH (3.6 mg, 0.150 mmol) and ethyl bromoacetate (33.3  $\mu$ L, 0.300 mmol) was added and the reaction was stirred at 25 °C for 2 h, the resulting mixture was directly filtered through a silica gel column (200–300 mesh) plug with CS<sub>2</sub>/ethyl acetate (5:1, v/v) to remove supporting electrolyte and insoluble materials, and then evaporated in vacuum to remove the solvent. Next, the residue was further separated on a silica gel column (300–400 mesh) with CS<sub>2</sub>/CH<sub>2</sub>Cl<sub>2</sub> (2:1, v/v) as the eluent to afford product **3ed** (11.9 mg, 72%) as an amorphous brown solid; <sup>1</sup>H NMR (500 MHz, 1:1 CS<sub>2</sub>/CDCl<sub>3</sub>)  $\delta$  8.12 (d,  $J$  = 2.0 Hz, 1H), 8.05 (d,  $J$  = 8.2 Hz, 2H), 7.87 (d,  $J$  = 8.4 Hz, 1H), 7.58 (dd,  $J$  = 8.4, 2.0 Hz, 1H), 7.19 (s, 1H), 7.17 (d,  $J$  = 8.2 Hz, 2H), 4.47 (d,  $J$  = 17.8 Hz, 1H), 4.33 (d,  $J$  = 17.8 Hz, 1H), 4.17–4.04 (m, 2H), 2.34 (s, 3H), 1.25 (t,  $J$  = 7.1 Hz, 3H); <sup>13</sup>C NMR (126 MHz, 1:1 CS<sub>2</sub>/CDCl<sub>3</sub>) (all 1C unless indicated)  $\delta$  168.44 (C=O), 155.55,

153.59, 152.85, 151.83, 147.51, 147.41, 147.28, 146.30, 146.29, 146.26, 146.19, 146.07, 146.04, 146.02, 146.00, 145.66, 145.56, 145.54, 145.46, 145.42, 145.37, 145.26 (2C), 145.21, 145.15, 145.10 (2C), 144.97 (2C, including one aryl C), 144.46 (2C), 144.44, 144.42, 144.25 (aryl C), 143.04, 143.01, 142.71, 142.65, 142.61, 142.56, 142.33, 142.22, 141.99, 141.95, 141.93, 141.84, 141.78, 141.76, 141.75, 141.70, 141.48, 141.22, 140.65, 140.56, 139.05, 139.00, 137.23 (aryl C), 136.66 (aryl C), 136.10, 135.14 (aryl C), 134.98, 134.68, 133.88, 130.13 (aryl C), 129.53 (2C, aryl C), 129.21 (aryl C), 129.06 (2C, aryl C), 126.17 (aryl C), 74.76 (sp<sup>3</sup>-C of C<sub>60</sub>), 73.57 (sp<sup>3</sup>-C of C<sub>60</sub>), 73.19, 61.49, 47.51, 21.65, 14.21; UV-vis (CHCl<sub>3</sub>) λ<sub>max</sub>/nm (log ε) 257 (4.99), 311 (4.52), 431 (4.13), 701 (2.62) (the characteristic absorptions at approximately 430 nm and 700 nm in the UV-vis data are consistent with the literature<sup>2</sup>); MALDI-TOF MS m/z calcd for C<sub>78</sub>H<sub>18</sub><sup>35</sup>ClNO<sub>4</sub>S [M]<sup>-</sup> 1099.0651, found 1099.0642.

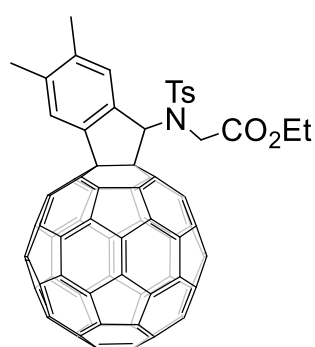

**3fd**

**Synthesis and spectral data of 3fd:** After the electrolysis of **1f** (15.1 mg, 0.015 mmol), the dianion **1f**<sup>2-</sup> was stirred at 70 °C for 3 h under Ar/O<sub>2</sub> bubbling through a latex tube, then NaH (3.6 mg, 0.150 mmol) and ethyl bromoacetate (33.3 μL, 0.300 mmol) was added and the reaction was stirred at 25 °C for 2 h, the resulting mixture was directly filtered through a silica gel column (200–300 mesh) plug with CS<sub>2</sub>/ethyl acetate (5:1, v/v) to remove supporting electrolyte and insoluble materials, and then evaporated in vacuum to remove the solvent. Next, the residue was further separated on a silica gel column (300–400 mesh) with CS<sub>2</sub>/CH<sub>2</sub>Cl<sub>2</sub> (2:1, v/v) as the eluent to afford product **3fd** (10.3 mg, 63%) as an amorphous brown solid; <sup>1</sup>H NMR (400 MHz, CDCl<sub>3</sub>) δ 8.09 (d, *J* = 8.2 Hz, 2H), 7.90 (s, 1H), 7.63 (s, 1H), 7.22 (s, 1H), 7.16 (d, *J* = 8.2 Hz, 2H), 4.53 (d, *J* = 18.0 Hz, 1H), 4.31 (d, *J* = 18.0 Hz, 1H), 4.19–4.04 (m, 2H), 2.48 (s, 3H), 2.46 (s, 3H), 2.32 (s, 3H), 1.24 (t, *J* = 7.1 Hz, 3H); <sup>13</sup>C NMR (101 MHz, CDCl<sub>3</sub>) (all 1C unless indicated) δ 168.84 (C=O), 156.49, 154.75, 153.85, 152.72, 147.90, 147.43, 147.28, 146.28, 146.24, 146.21, 146.17, 146.11, 146.08, 146.02 (2C), 146.00, 145.67 (2C), 145.60, 145.52, 145.27, 145.25 (2C), 145.22, 145.19, 145.13, 145.11, 144.87, 144.57 (aryl C), 144.50, 144.47, 144.35, 144.31, 143.04, 143.01, 142.70, 142.63, 142.59, 142.53, 142.36, 142.24, 142.21, 142.06, 141.95 (2C), 141.77 (2C), 141.75, 141.74, 141.44, 141.33, 140.79 (aryl C), 140.56, 140.47, 140.34 (aryl C), 139.11 (aryl C), 138.99 (2C), 136.66 (aryl C), 136.20, 134.72, 134.65, 134.01, 133.82 (aryl C), 129.56 (2C, aryl C), 129.18 (2C, aryl C), 128.03 (aryl C), 126.72 (aryl C), 74.84 (sp<sup>3</sup>-C of C<sub>60</sub>), 73.95 (sp<sup>3</sup>-C of C<sub>60</sub>), 73.88, 61.44, 47.64, 21.65, 20.36, 20.26, 14.23; UV-vis (CHCl<sub>3</sub>) λ<sub>max</sub>/nm (log ε) 257 (5.00), 311 (4.51), 431 (4.15), 703 (3.39) (the characteristic absorptions at approximately 430 nm and 700 nm in the UV-vis data are consistent with the literature<sup>2</sup>); MALDI-TOF MS m/z calcd for C<sub>80</sub>H<sub>23</sub>NO<sub>4</sub>S [M]<sup>-</sup> 1093.1353, found 1093.1345.

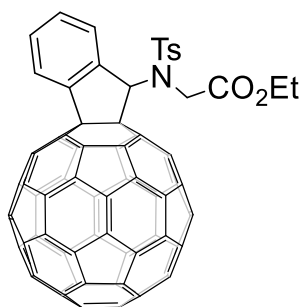

**3gd**

**Synthesis and spectral data of 3gd:** After the electrolysis of **1g** (14.7 mg, 0.015 mmol), the dianion **1g**<sup>2-</sup> was stirred at 70 °C for 3 h under Ar/O<sub>2</sub> bubbling through a latex tube, then NaH (3.6 mg, 0.150 mmol) and ethyl bromoacetate (33.3 μL, 0.300 mmol) was added and the reaction was stirred at 25 °C for 2 h, the resulting mixture was directly filtered through a silica gel column (200–300 mesh) plug with CS<sub>2</sub>/ethyl acetate (5:1, v/v) to remove supporting electrolyte and insoluble materials, and then evaporated in vacuum to remove the solvent. Next, the residue was further separated on a silica gel column (300–400 mesh) with CS<sub>2</sub>/CH<sub>2</sub>Cl<sub>2</sub> (2:1, v/v) as the eluent to afford product **3gd** (10.3 mg, 64%) as an amorphous brown solid; <sup>1</sup>H NMR (500 MHz, 1:1 CS<sub>2</sub>/CDCl<sub>3</sub>) δ 8.14 (d, *J* = 7.5 Hz, 1H), 8.06 (d, *J* = 8.3 Hz, 2H), 7.90 (d, *J* = 7.8 Hz, 1H), 7.69 (t, *J* = 7.4 Hz, 1H), 7.61 (t, *J* = 7.5 Hz, 1H), 7.24 (s, 1H), 7.16 (d, *J* = 8.3 Hz, 2H), 4.47 (d, *J* = 17.9 Hz, 1H), 4.31 (d, *J* = 17.9 Hz, 1H), 4.15–4.02 (m, 2H), 2.35 (s, 3H), 1.23 (t, *J* = 7.1 Hz, 3H); <sup>13</sup>C NMR (126 MHz, 1:1 CS<sub>2</sub>/CDCl<sub>3</sub>) (all 1C unless indicated) δ 168.46 (C=O), 156.11, 154.34, 153.57, 152.36, 147.75, 147.36, 147.23, 146.24 (2C), 146.20, 146.14, 146.04, 145.98 (2C), 145.94, 145.83, 145.64, 145.57, 145.50, 145.37, 145.29, 145.26, 145.24, 145.22, 145.19, 145.15, 145.06, 144.92, 144.45, 144.42, 144.26, 144.24 (2C, including one aryl C), 143.01, 142.98, 142.96 (aryl C), 142.67, 142.61, 142.57, 142.51, 142.33, 142.21, 142.10, 141.94, 141.91, 141.90, 141.76, 141.72, 141.70 (2C), 141.45, 141.24, 140.56, 140.45, 139.00, 138.95, 136.84 (aryl C), 136.71 (aryl C), 136.15, 134.81, 134.56, 133.93, 130.97 (aryl C), 129.65 (aryl C), 129.43 (2C, aryl C), 129.11 (2C, aryl C), 127.94 (aryl C), 126.03 (aryl C), 74.57 (sp<sup>3</sup>-C of C<sub>60</sub>), 74.08 (sp<sup>3</sup>-C of C<sub>60</sub>), 73.84, 61.33, 47.57, 21.62, 14.22; UV-vis (CHCl<sub>3</sub>) λ<sub>max</sub>/nm (log ε) 257 (5.01), 311 (4.54), 431 (4.22), 701 (3.43) (the characteristic absorptions at approximately 430 nm and 700 nm in the UV-vis data are consistent with the literature<sup>2</sup>); MALDI-TOF MS *m/z* calcd for C<sub>78</sub>H<sub>19</sub>NO<sub>4</sub>S [M]<sup>-</sup> 1065.1040, found 1065.1033.

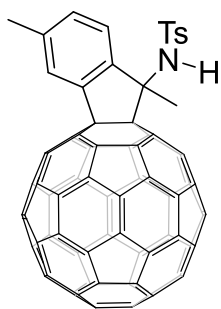

**3ha**

**Synthesis and spectral data of 3ha:** After the electrolysis of **1h** (14.9 mg, 0.015 mmol), the dianion **1h**<sup>2-</sup> was stirred at 25 °C for 2 h under Ar/O<sub>2</sub> bubbling through a latex tube, then TFA (3.4 μL, 0.045 mmol) was added, and the reaction was stirred at 25 °C for 15 min, the resulting mixture was directly filtered through a silica gel column (200–300 mesh) plug with CS<sub>2</sub>/ethyl acetate (5:1, v/v) to remove supporting electrolyte and insoluble materials, and then evaporated in vacuum to remove the solvent. Next, the residue was further separated on a silica gel column (300–400 mesh) with CS<sub>2</sub>/CH<sub>2</sub>Cl<sub>2</sub> (3:1, v/v) as the eluent to afford product **3ha** (9.2 mg, 62%) as an amorphous brown solid; <sup>1</sup>H NMR (400 MHz, CDCl<sub>3</sub>) δ 7.93 (s, 1H), 7.83 (d, *J* = 8.2 Hz, 2H), 7.58 (d, *J* = 8.0 Hz, 1H), 7.38 (dd, *J* = 8.0, 0.9 Hz, 1H), 7.29 (d, *J* = 8.2 Hz, 2H), 5.92 (s, 1H), 2.54 (s, 3H), 2.51 (s, 3H), 2.44 (s, 3H); <sup>13</sup>C NMR (101 MHz, CDCl<sub>3</sub>) δ 155.99, 155.34, 154.83, 154.16, 147.57, 147.40, 146.67, 146.34, 146.31, 146.27, 146.15, 146.11, 146.08 (2C), 146.07, 146.04, 145.97, 145.75, 145.55, 145.53, 145.49, 145.32, 145.30 (2C), 145.26 (3C), 145.21, 144.56 (aryl C), 144.52, 144.48, 143.55 (aryl C), 143.12, 143.11, 142.72 (aryl C), 142.66 (2C), 142.50, 142.40, 142.22, 142.15, 142.08, 142.06, 141.99 (2C), 141.98, 141.92 (2C), 141.86, 141.80, 141.76, 141.72, 141.66, 140.86 (aryl C), 140.60, 140.53, 140.11 (aryl C), 139.35, 139.26, 136.25, 135.53, 135.18, 135.07, 130.91 (aryl C), 129.68 (2C, aryl C), 127.34 (2C, aryl C), 126.19 (aryl C), 125.84 (aryl C), 81.50, 75.95 (sp<sup>3</sup>-C of C<sub>60</sub>), 74.07 (sp<sup>3</sup>-C of C<sub>60</sub>), 29.77, 21.63, 21.60; UV-vis (CHCl<sub>3</sub>) λ<sub>max</sub>/nm (log ε) 257 (4.98), 309 (4.49), 431 (4.18), 700 (3.36) (the characteristic absorptions at approximately 430 nm and 700 nm in the UV-vis data are consistent with the literature<sup>2</sup>); MALDI-TOF MS *m/z* calcd for C<sub>76</sub>H<sub>17</sub>NO<sub>2</sub>S [M]<sup>-</sup> 1007.0985, found 1007.0988.

**Scale-up synthesis of 3ah:** Compound **1a** (149.2 mg, 0.150 mmol) was dissolved in 30 mL of anhydrous 1,2-C<sub>6</sub>H<sub>4</sub>Cl<sub>2</sub> solvent containing 0.1 M TBAP. Then the solution was electroreduced by CPE at -1.34 V under argon bubbling at 25 °C. When the theoretical number of coulombs (29.0 C) was reached, the electrolysis was terminated after ca. 17 h, and the solution of **1a**<sup>2-</sup> was obtained. The dianion **1a**<sup>2-</sup> was stirred at 70 °C for 3 h under Ar/O<sub>2</sub> bubbling, then *n*-butyl iodide (854.0 μL, 7.50 mmol) was added, and the reaction was stirred at 25 °C for 2 h, the resulting mixture was directly filtered through a silica gel column (200–300 mesh) plug with CS<sub>2</sub>/ethyl acetate (5:1, v/v) to remove supporting electrolyte and insoluble materials, and then evaporated in vacuum to remove the solvent. Next, the residue was further separated on a silica gel column (300–400 mesh) with CS<sub>2</sub>/CH<sub>2</sub>Cl<sub>2</sub> (4:1, v/v) as the eluent to afford product **3ah** (35.5 mg, 23%) as an amorphous brown solid.

#### 4. X-ray crystallography of compound **3aa**

Black block crystals of **3aa** were obtained by slow evaporation of a saturated solution in CS<sub>2</sub>/CH<sub>3</sub>OH at 25 °C. Single-crystal X-ray diffraction data were collected on a diffractometer (XtaLAB PRO 007HF (Cu), Rigaku) equipped with a CCD area detector using graphite-monochromated CuK $\alpha$  radiation ( $\lambda = 1.54184 \text{ \AA}$ ) in the scan range  $9.15^\circ < 2\theta < 158.68^\circ$ . The structure was solved with intrinsic phasing using SHELXT and refined with full-matrix least-squares refinement using the SHELXL program within OLEX2. Crystallographic data have been deposited in the Cambridge Crystallographic Data Centre as deposition number CCDC 2527512.

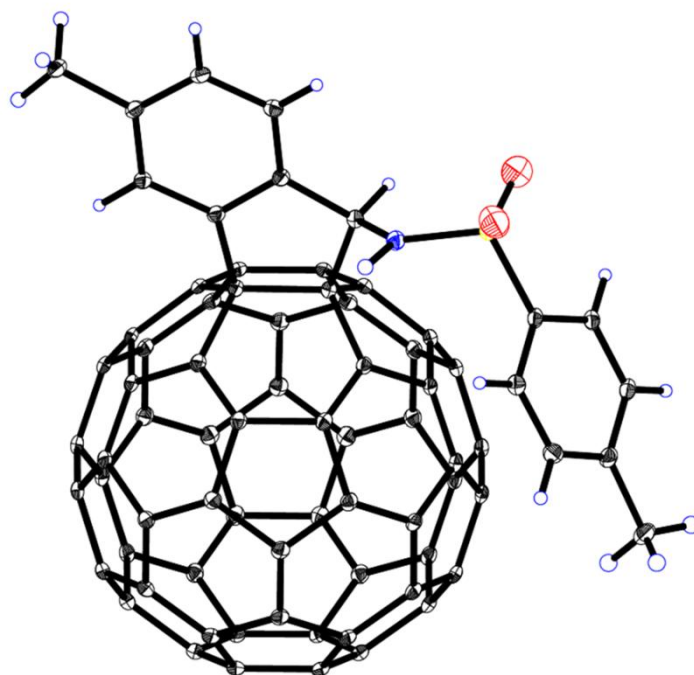

**Fig. S9** ORTEP diagram of **3aa** with thermal ellipsoids shown at 20% probability. The CS<sub>2</sub> molecule is omitted for clarity.

**Table S1 Crystal data of 3aa.**

|                                             |                                                                |
|---------------------------------------------|----------------------------------------------------------------|
| Identification code                         | 2527512                                                        |
| Empirical formula                           | C <sub>76</sub> H <sub>15</sub> NO <sub>2</sub> S <sub>3</sub> |
| Formula weight                              | 1070.07                                                        |
| Temperature/K                               | 111(2)                                                         |
| Crystal system                              | triclinic                                                      |
| Space group                                 | P-1                                                            |
| a/Å                                         | 9.89343(15)                                                    |
| b/Å                                         | 13.8418(2)                                                     |
| c/Å                                         | 16.4878(3)                                                     |
| α/°                                         | 104.5485(16)                                                   |
| β/°                                         | 98.8265(15)                                                    |
| γ/°                                         | 96.0111(14)                                                    |
| Volume/Å <sup>3</sup>                       | 2135.24(7)                                                     |
| Z                                           | 2                                                              |
| ρ <sub>calc</sub> /cm <sup>3</sup>          | 1.664                                                          |
| μ/mm <sup>-1</sup>                          | 2.111                                                          |
| F(000)                                      | 1084.0                                                         |
| Crystal size/mm <sup>3</sup>                | 0.15 × 0.12 × 0.08                                             |
| Radiation                                   | Cu Kα (λ = 1.54184)                                            |
| 2θ range for data collection/°              | 9.15 to 158.68                                                 |
| Index ranges                                | -12 ≤ h ≤ 12, -13 ≤ k ≤ 17, -20 ≤ l ≤ 21                       |
| Reflections collected                       | 27839                                                          |
| Independent reflections                     | 8997 [R <sub>int</sub> = 0.0382, R <sub>sigma</sub> = 0.0424]  |
| Data/restraints/parameters                  | 8997/0/744                                                     |
| Goodness-of-fit on F <sup>2</sup>           | 1.086                                                          |
| Final R indexes [I ≥ 2σ (I)]                | R <sub>1</sub> = 0.0509, wR <sub>2</sub> = 0.1374              |
| Final R indexes [all data]                  | R <sub>1</sub> = 0.0613, wR <sub>2</sub> = 0.1442              |
| Largest diff. peak/hole / e Å <sup>-3</sup> | 0.60/-0.70                                                     |

## 5. Control experiments

When the 1.0 ppm Ar/O<sub>2</sub> bubbling flow rate was measured to be approximately 2.4 mL s<sup>-1</sup> via the water displacement method, the reaction yield of **3aa** was 66%. Increasing the Ar/O<sub>2</sub> bubbling flow rate to 4.6 mL s<sup>-1</sup> or reducing it to 0.5 mL s<sup>-1</sup> gave yields of 65% and 62%, respectively (Scheme S1a).

Then, the electrolyzed reaction mixture was transferred into a Schlenk tube under an Ar atmosphere without bubbling and stirred at 70 °C for 3 h, and product **3aa** was isolated in 53% yield. When the reaction time was further extended to 6 h under the same conditions, the yield decreased slightly to 52%. For comparison, the electrolyzed reaction mixture was transferred into a Schlenk tube and subjected to three consecutive freeze-pump-thaw cycles. The mixture was then stirred under an Ar atmosphere without bubbling at 70 °C for 3 h, and only a 15% yield was obtained (Scheme S1b). These results indicated that O<sub>2</sub> was essential for this transformation, and the O<sub>2</sub> required for the reaction mainly originates from dissolved O<sub>2</sub> in the solution, which could not be fully removed by argon bubbling.

Subsequently, the latex tube used for Ar bubbling was replaced with a fluorinated ethylene propylene (FEP) tube to better avoid atmospheric O<sub>2</sub> permeation through the tube. The electrolyzed reaction mixture was stirred at 70 °C for 3 h, and **3aa** was isolated in 54% yield. Prolongation of the bubbling time to 6 h gave a yield of 57% (Scheme S1c). These results indicated that partial O<sub>2</sub> for full conversion arose from O<sub>2</sub> permeation through the latex tube into the reaction system during the Ar/O<sub>2</sub> bubbling process.

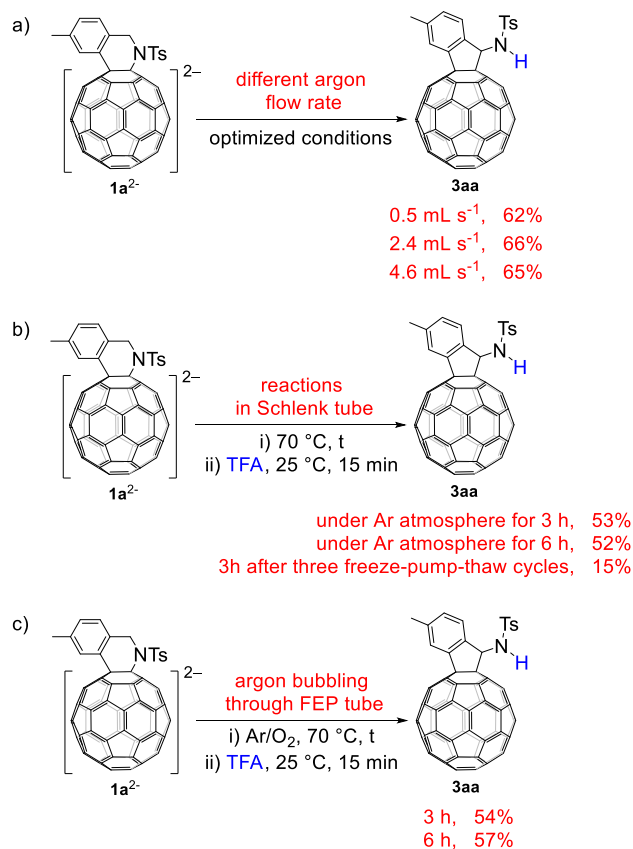

Scheme S1 Control experiments.

The calculation of O<sub>2</sub> permeation through the latex tubing is based on the widely accepted solution-diffusion model for gas transport in polymers,<sup>3</sup> described by the following equation:

$$J = \frac{P^G(p_o - p_e)}{l}$$

where  $J$  is the O<sub>2</sub> flux through the tube wall per unit wall area per time O<sub>2</sub> (cm<sup>3</sup> cm<sup>-2</sup> s<sup>-1</sup>),  $P^G$  is the O<sub>2</sub> permeability coefficient of latex (cm<sup>2</sup>·s<sup>-1</sup>·cmHg<sup>-1</sup>, 1 Barrer = 10<sup>-10</sup> cm<sup>2</sup>·s<sup>-1</sup>·cmHg<sup>-1</sup>),  $p_o$  is the O<sub>2</sub> partial pressure outside the tube (cmHg),  $p_e$  is the O<sub>2</sub> partial pressure inside the tube (cmHg), and  $l$  is the wall thickness (cm).

The O<sub>2</sub> permeability coefficient  $P^G$  of the latex tube is taken as 24 Barrer, based on the value reported in the literature.<sup>4</sup> The latex tube used in our setup had an inner diameter of 6 mm, an outer diameter of 9 mm, and a total length of 2 m. The O<sub>2</sub> partial pressure in ambient air is 0.21 atm, which corresponds to 15.96 cmHg. The carrier gas inside the tube is high-purity argon containing 1.0 ppm O<sub>2</sub>, so the internal O<sub>2</sub> partial pressure is taken as 0 cmHg. Thus, by substituting the numerical values into the formula, the value of  $J$  in the latex tube is calculated as follows:

$$J = \frac{24 \times 10^{-10} \text{ cm}^2 \text{ s}^{-1} \text{ cmHg}^{-1} \times 15.96 \text{ cmHg}^{-1}}{(0.9 - 0.6) / 2 \text{ cm}} = 2.55 \times 10^{-7} \text{ cm}^3 \text{ cm}^{-2} \text{ s}^{-1}$$

To facilitate understanding of the calculation process, we defined the O<sub>2</sub> permeation quantity as  $Q$ , the inner surface area of the latex tube as  $A$ , and the bubbling time as  $t$ . Then we obtained the following formula:

$$J = \frac{Q}{A \times t}$$

Therefore, under our experimental conditions, the O<sub>2</sub> permeation quantity per hour in the latex tube is calculated as follows:

$$\begin{aligned} Q &= J \times A \times t = 2.55 \times 10^{-7} \text{ cm}^3 \text{ cm}^{-2} \text{ s}^{-1} \times (\pi \times 0.6 \times 200) \text{ cm}^2 \times 3600 \text{ s} \\ &= 0.35 \text{ cm}^3 \end{aligned}$$

This corresponds to 0.014 mmol h<sup>-1</sup> of O<sub>2</sub> permeating through the latex tube into the reaction system. The calculated amount of permeated O<sub>2</sub> is sufficient to complete the remaining conversion.

## 6. NMR spectra of compounds 3aa–ha

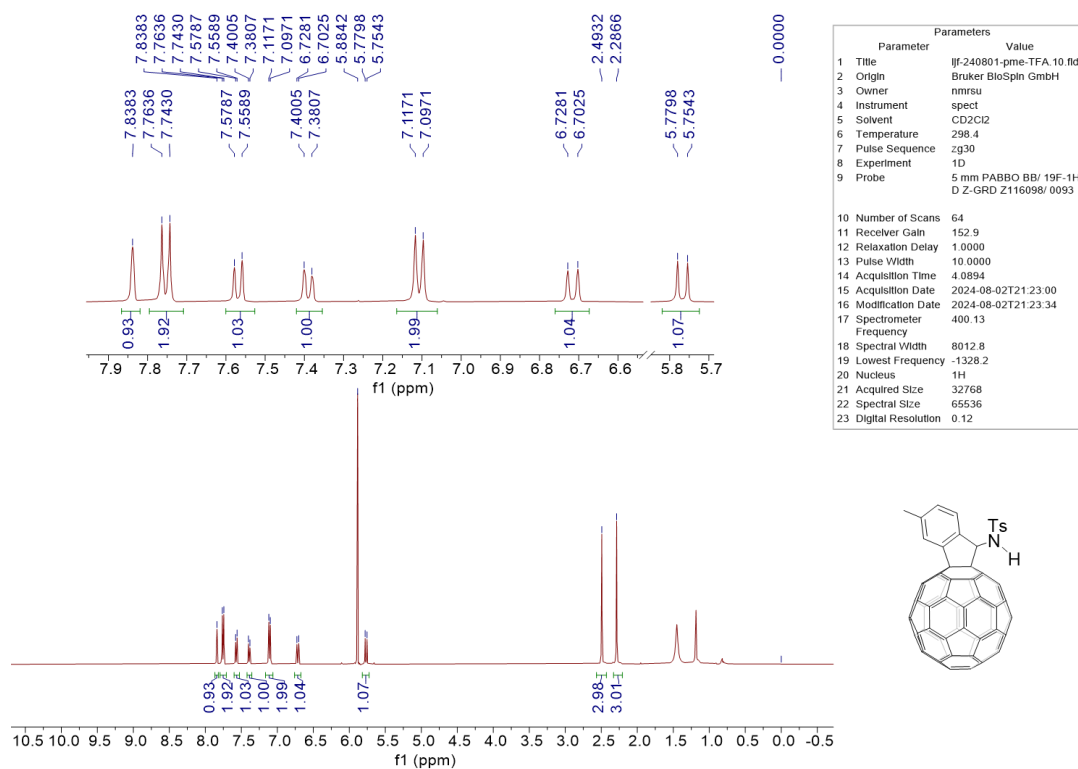

**Fig. S10** <sup>1</sup>H NMR (400 MHz, 1:1 CS<sub>2</sub>/CDCl<sub>2</sub>CDCl<sub>2</sub>) of compound **3aa**.

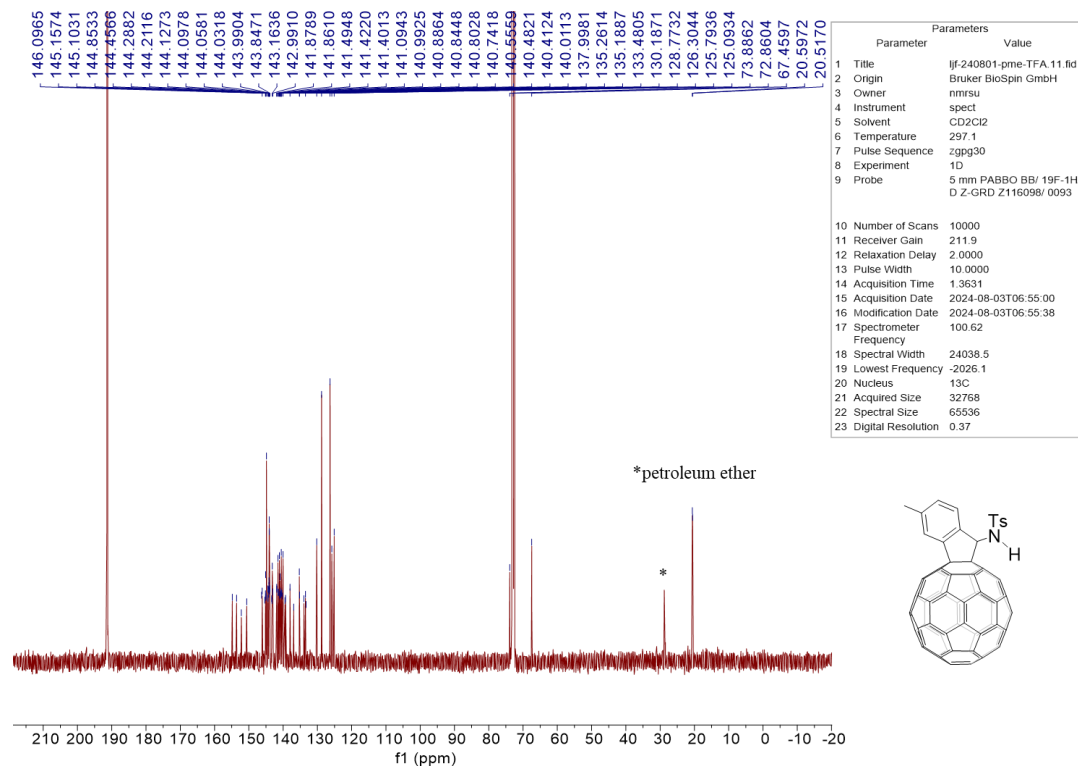

**Fig. S11** <sup>13</sup>C NMR (101 MHz, 1:1 CS<sub>2</sub>/CDCl<sub>2</sub>CDCl<sub>2</sub>) of compound **3aa**.

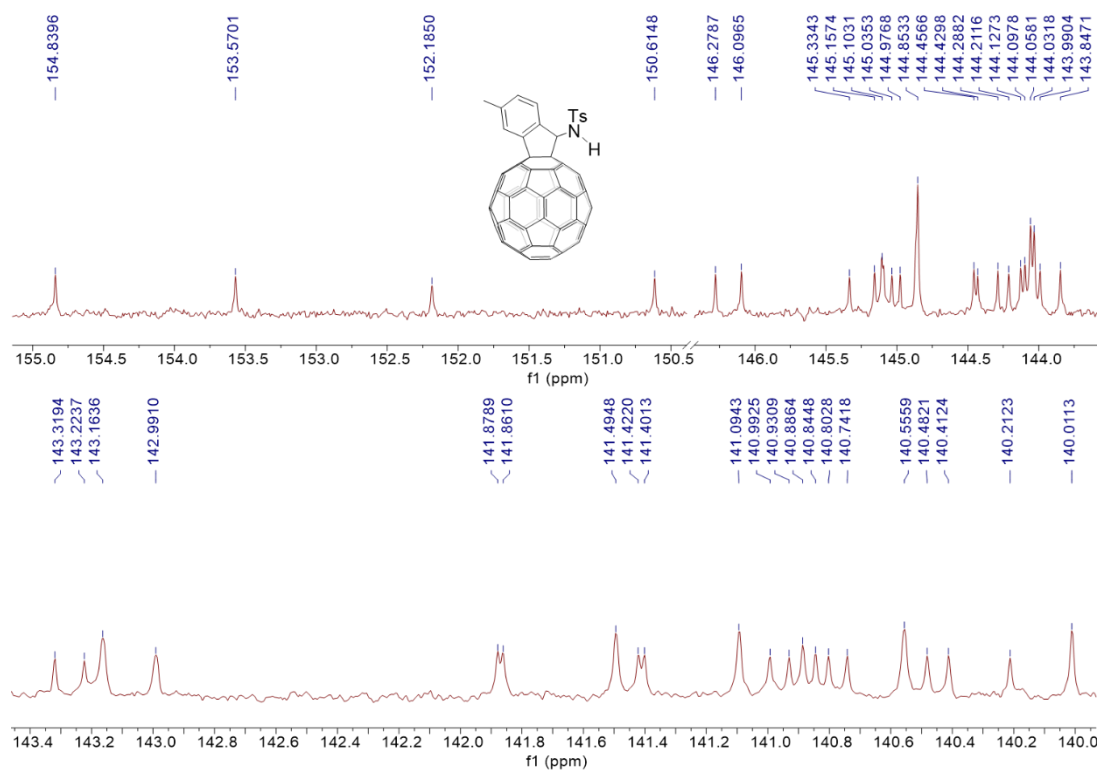

**Fig. S12** Expanded  $^{13}\text{C}$  NMR (101 MHz, 1:1  $\text{CS}_2/\text{CDCl}_2\text{CDCl}_2$ ) of compound **3aa**.

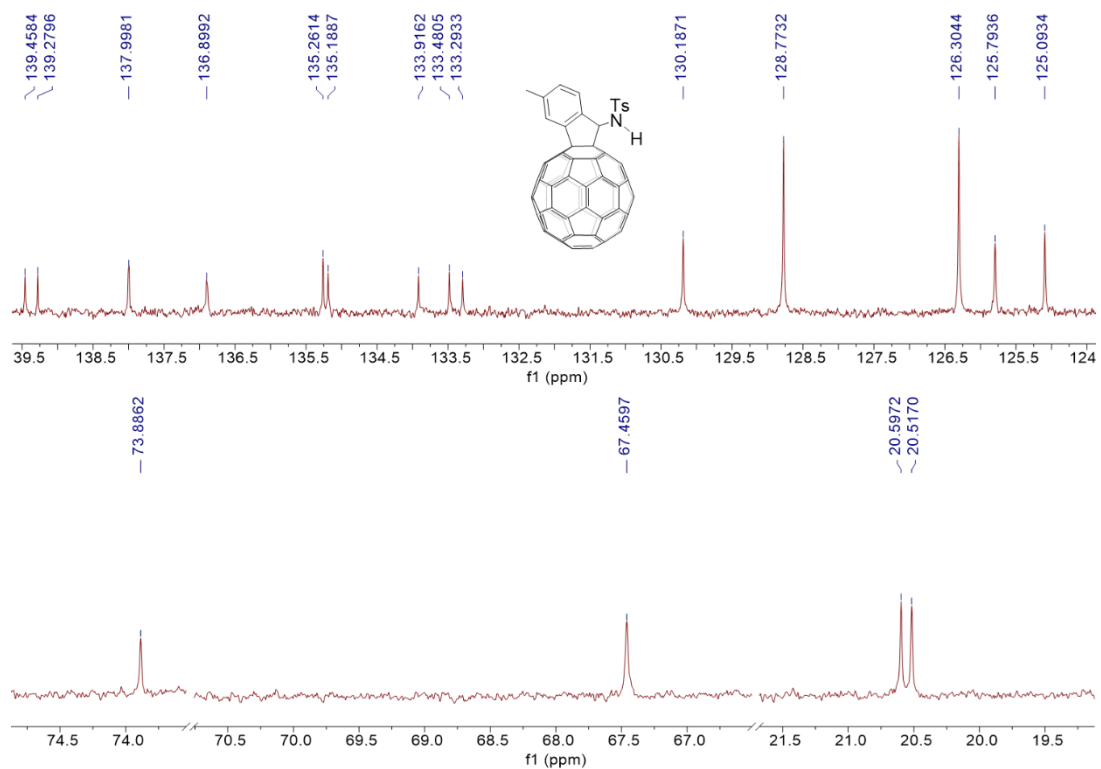

**Fig. S13** Expanded  $^{13}\text{C}$  NMR (101 MHz, 1:1  $\text{CS}_2/\text{CDCl}_2\text{CDCl}_2$ ) of compound **3aa**.



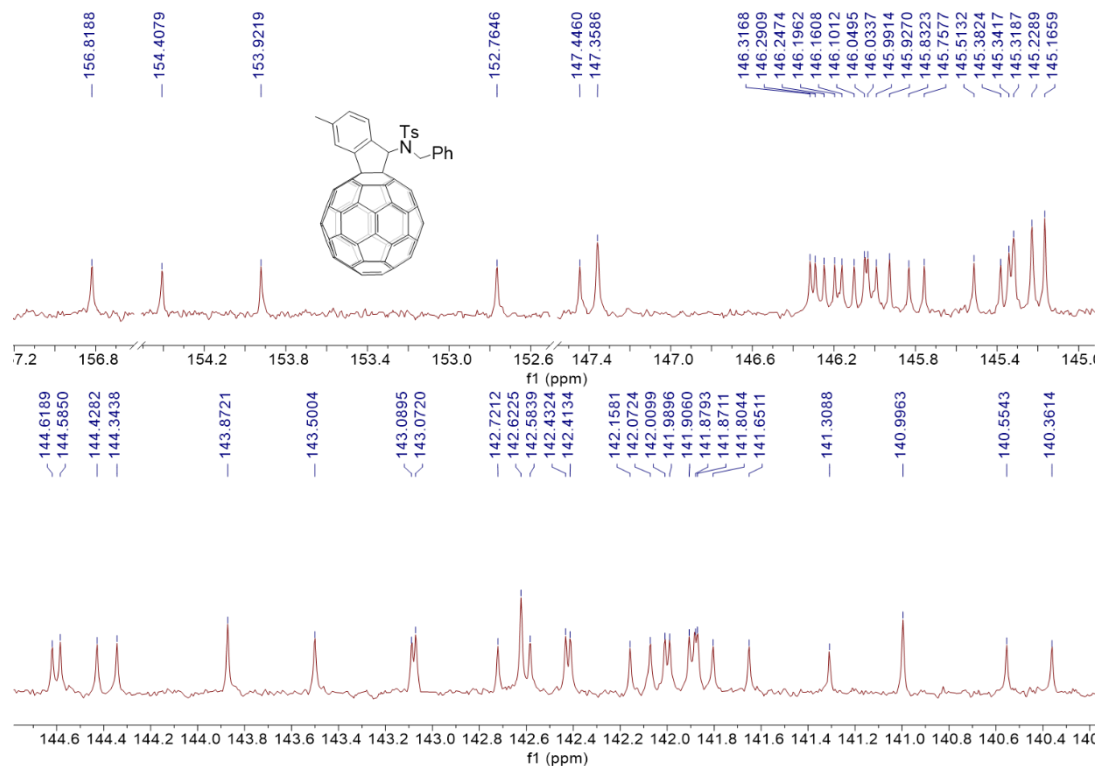

**Fig. S16** Expanded  $^{13}\text{C}$  NMR (126 MHz,  $\text{CDCl}_3$ ) of compound **3ab**.

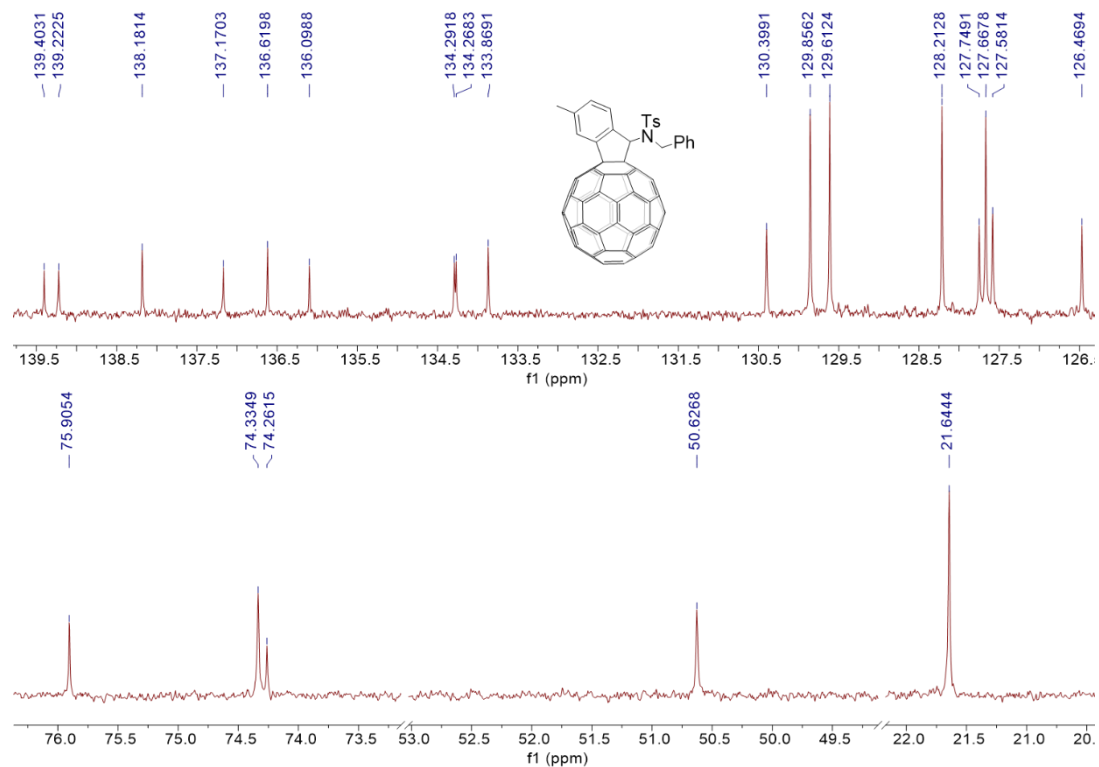

**Fig. S17** Expanded  $^{13}\text{C}$  NMR (126 MHz,  $\text{CDCl}_3$ ) of compound **3ab**.

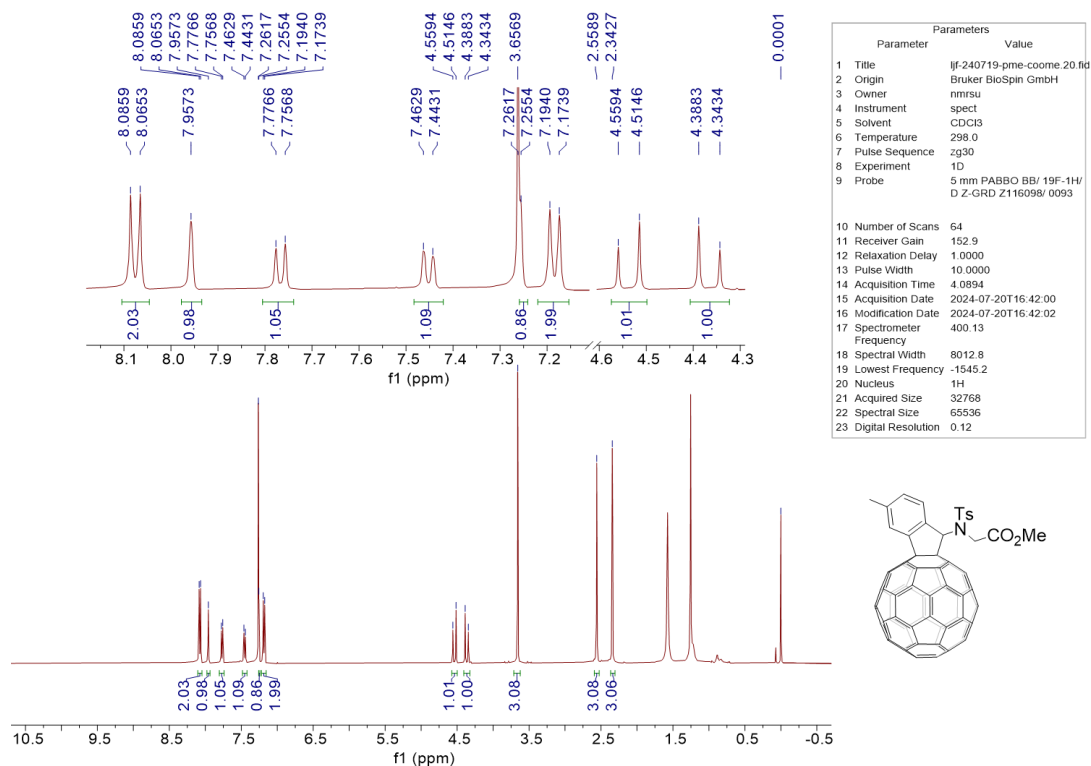

Fig. S18  $^1\text{H}$  NMR (400 MHz,  $\text{CDCl}_3$ ) of compound **3ac**.

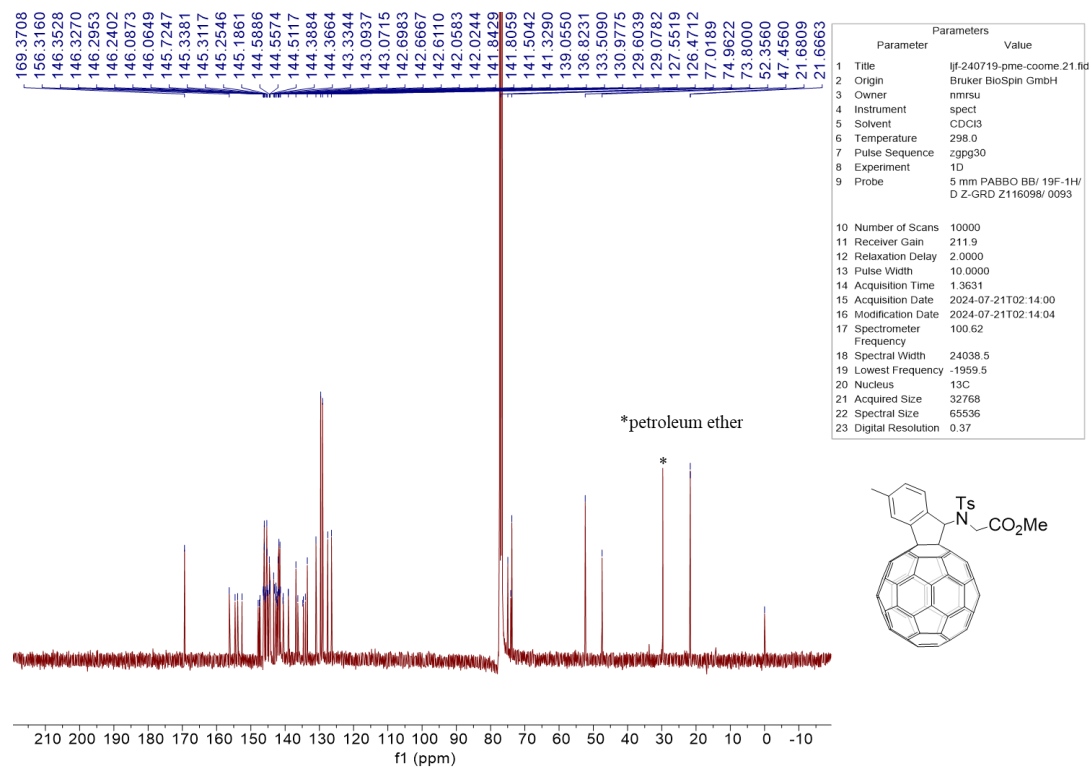

Fig. S19  $^{13}\text{C}$  NMR (101 MHz,  $\text{CDCl}_3$ ) of compound **3ac**.

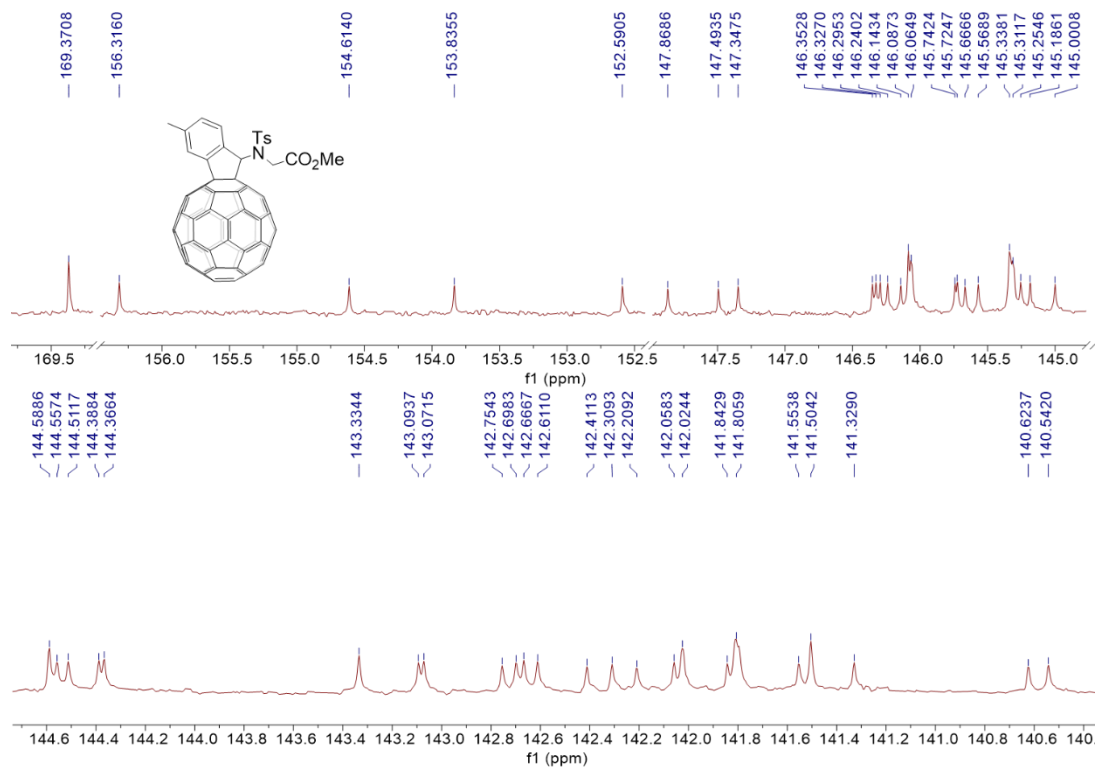

**Fig. S20** Expanded <sup>13</sup>C NMR (101 MHz, CDCl<sub>3</sub>) of compound **3ac**.

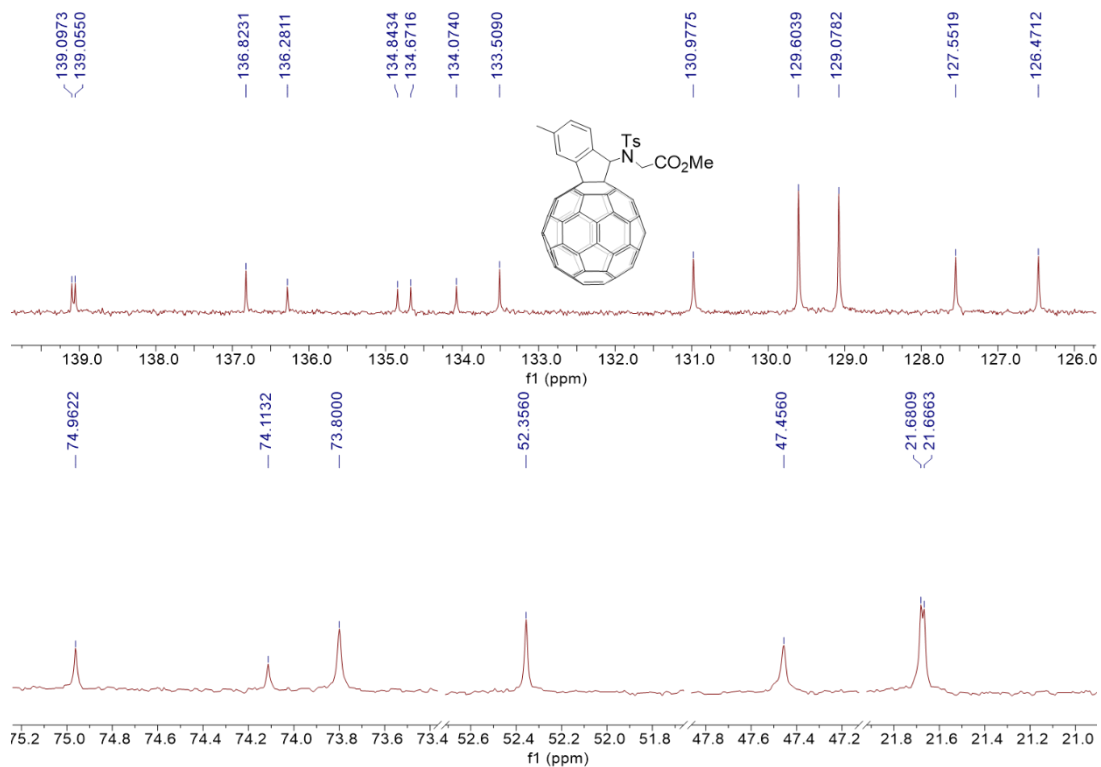

**Fig. S21** Expanded <sup>13</sup>C NMR (101 MHz, CDCl<sub>3</sub>) of compound **3ac**.

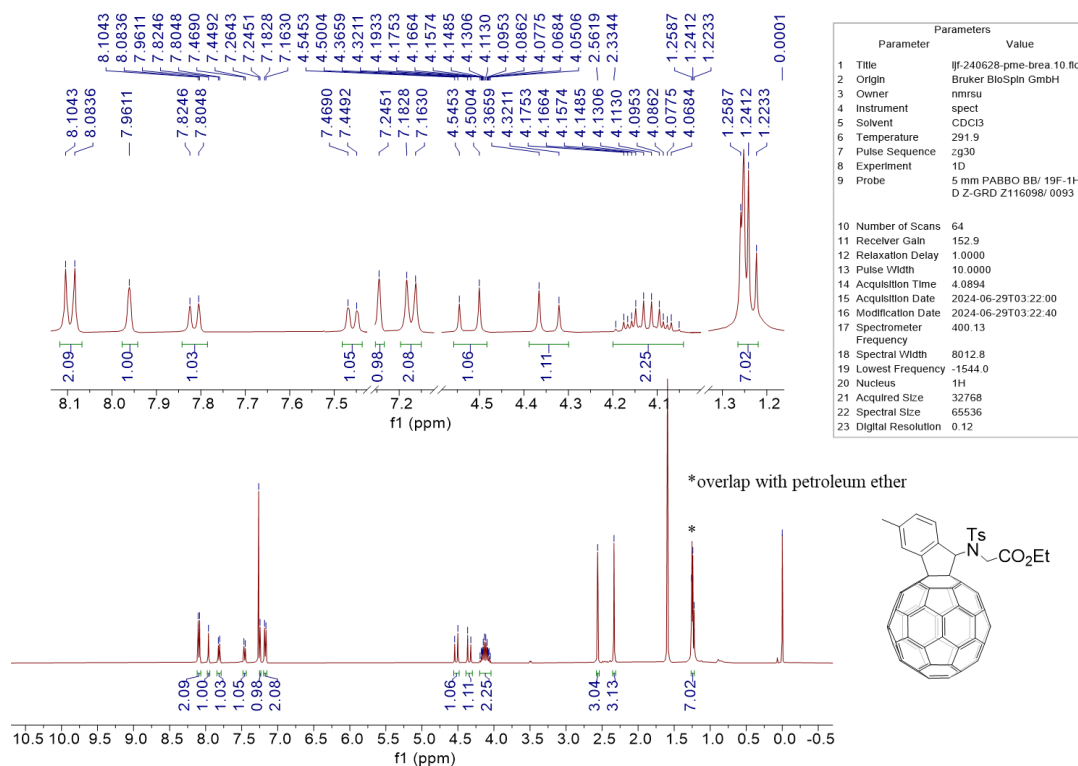

**Fig. S22**  $^1\text{H}$  NMR (400 MHz,  $\text{CDCl}_3$ ) of compound **3ad**.

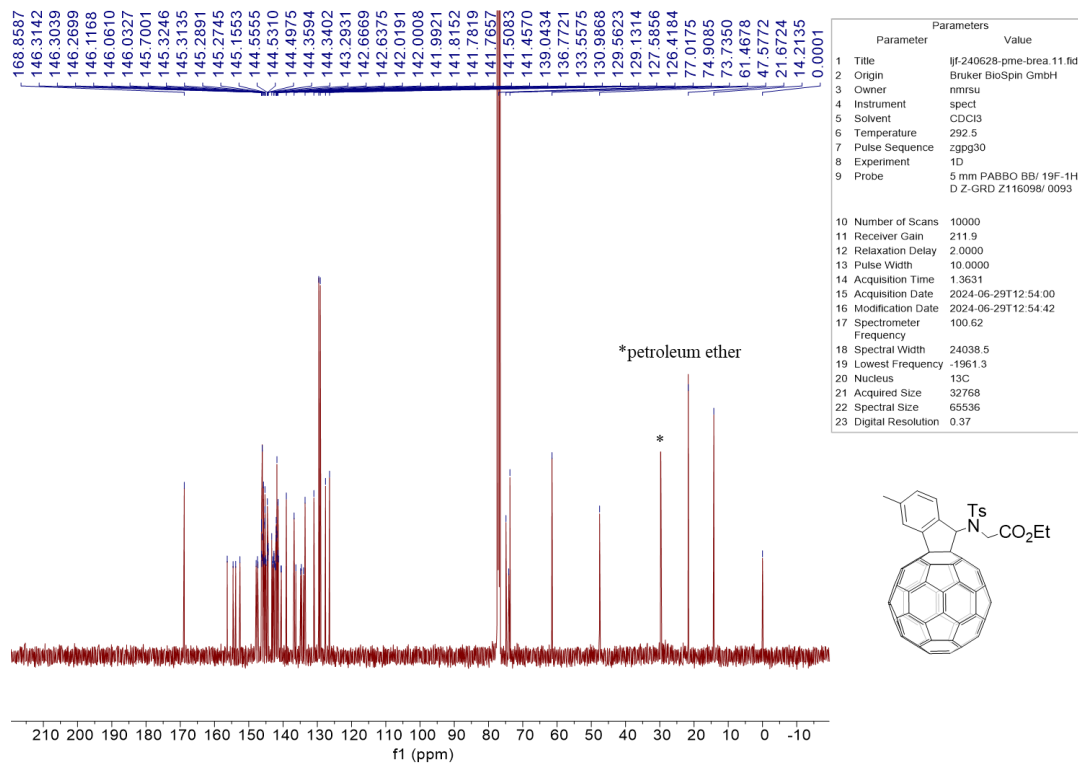

**Fig. S23**  $^{13}\text{C}$  NMR (101 MHz,  $\text{CDCl}_3$ ) of compound **3ad**.

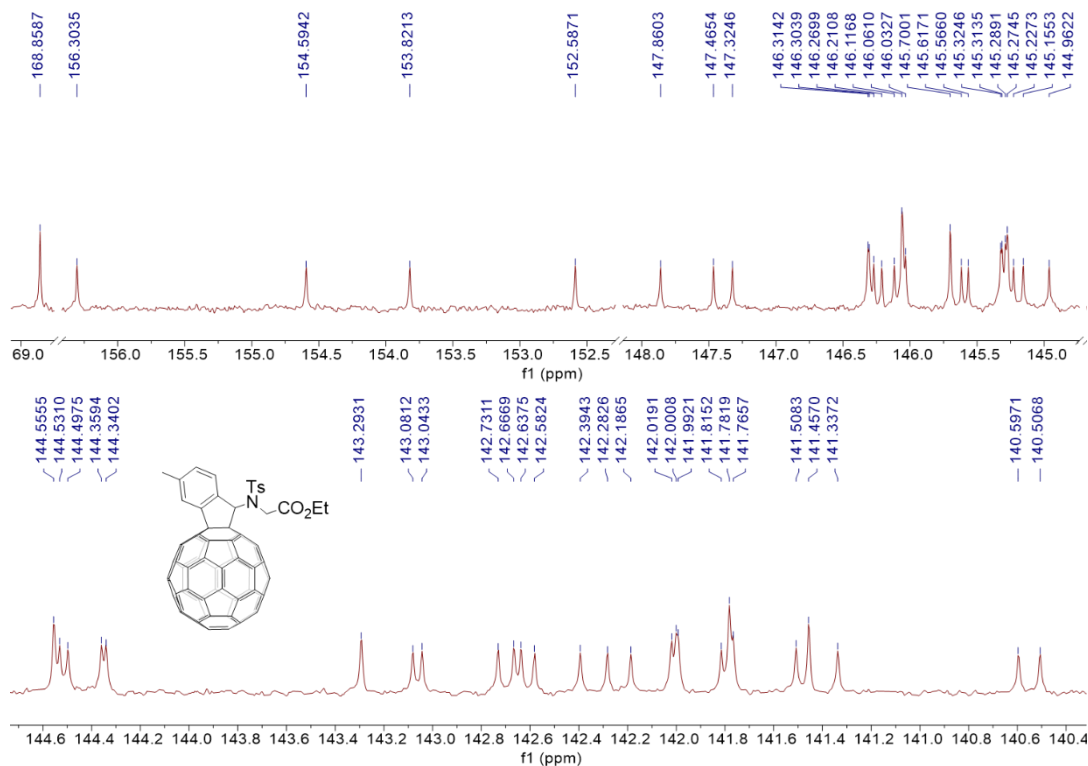

**Fig. S24** Expanded  $^{13}\text{C}$  NMR (101 MHz,  $\text{CDCl}_3$ ) of compound **3ad**.

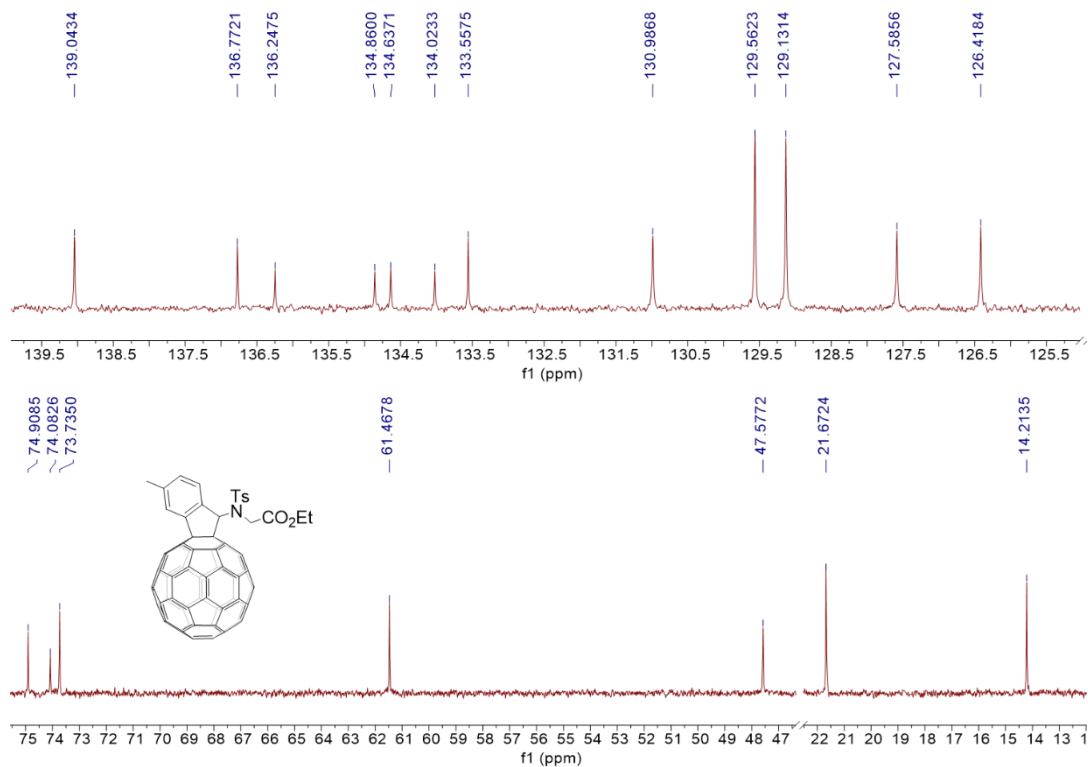

**Fig. S25** Expanded  $^{13}\text{C}$  NMR (101 MHz,  $\text{CDCl}_3$ ) of compound **3ad**.

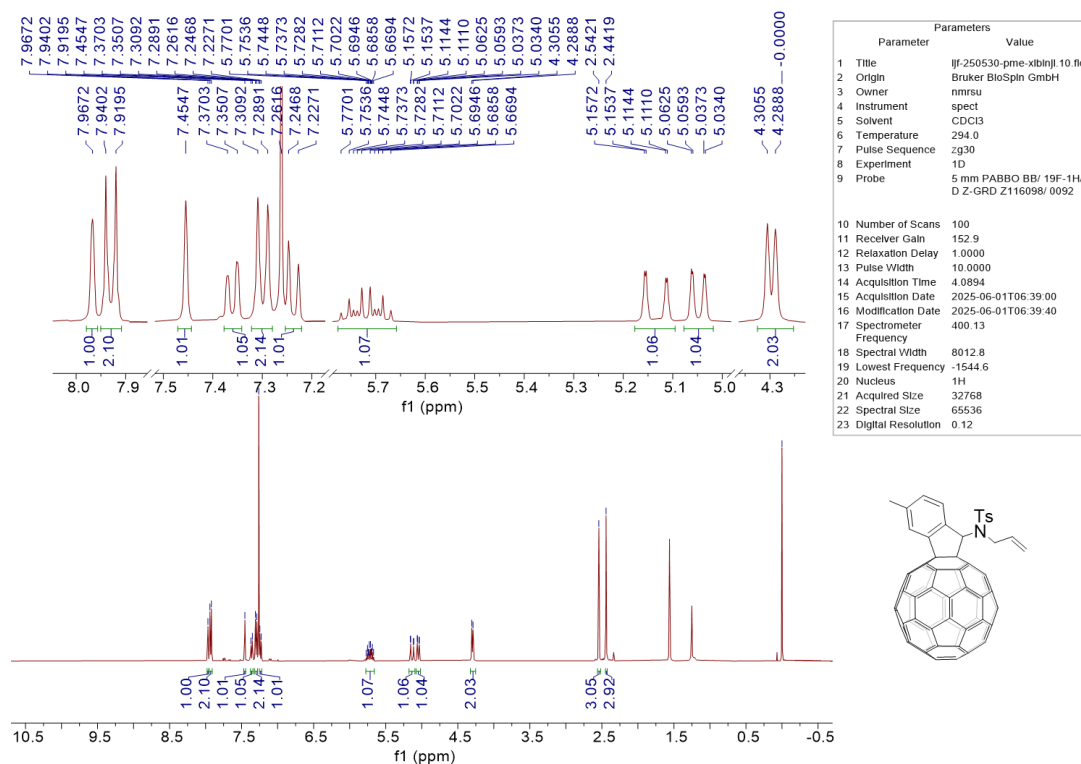

Fig. S26  $^1\text{H}$  NMR (400 MHz,  $\text{CDCl}_3$ ) of compound 3ae.

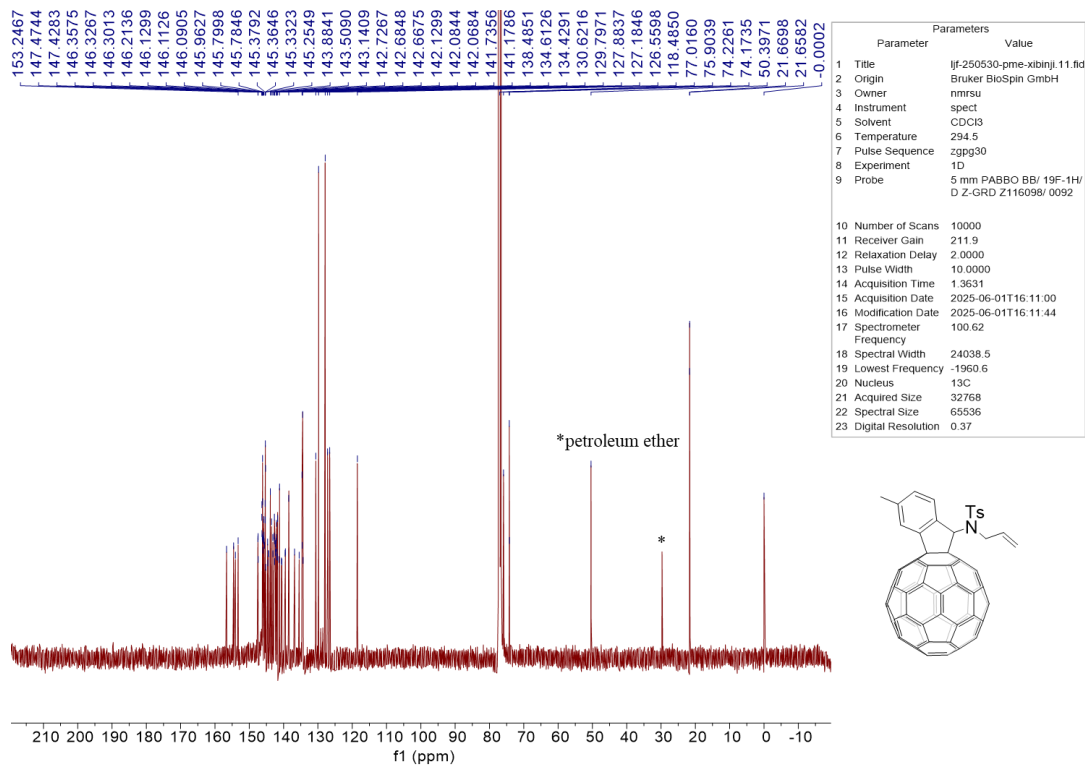

Fig. S27  $^{13}\text{C}$  NMR (101 MHz,  $\text{CDCl}_3$ ) of compound 3ae.

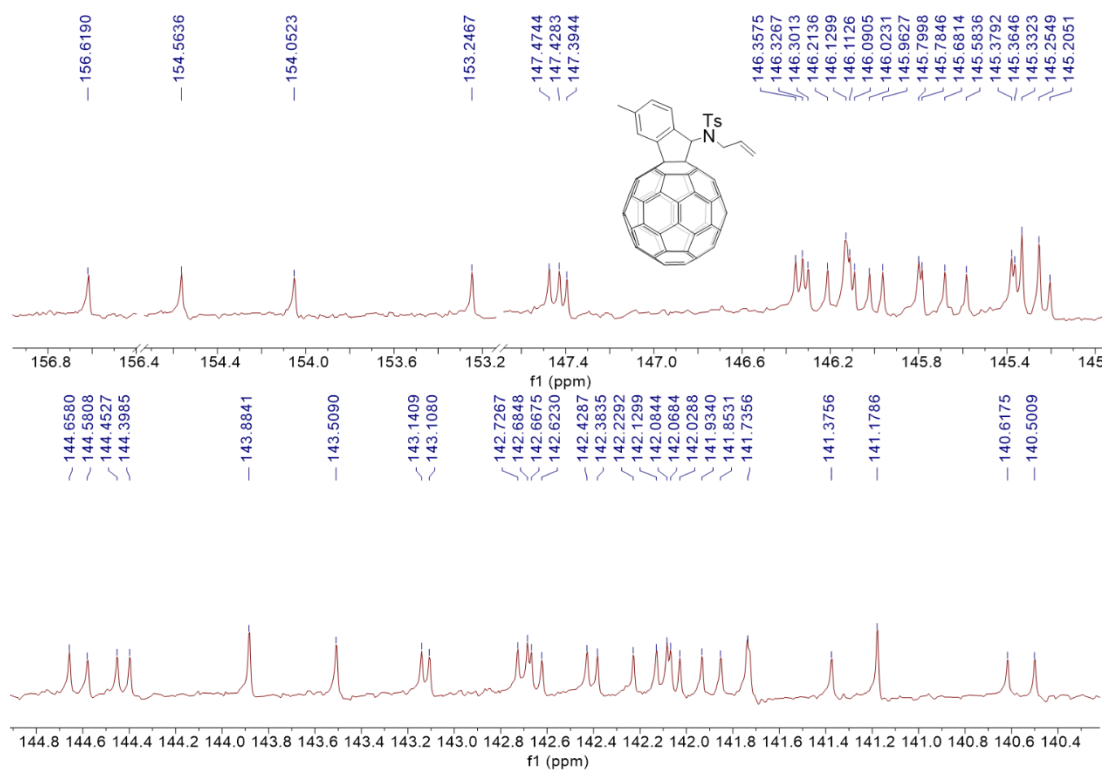

Fig. S28 Expanded  $^{13}\text{C}$  NMR (101 MHz,  $\text{CDCl}_3$ ) of compound **3ae**.

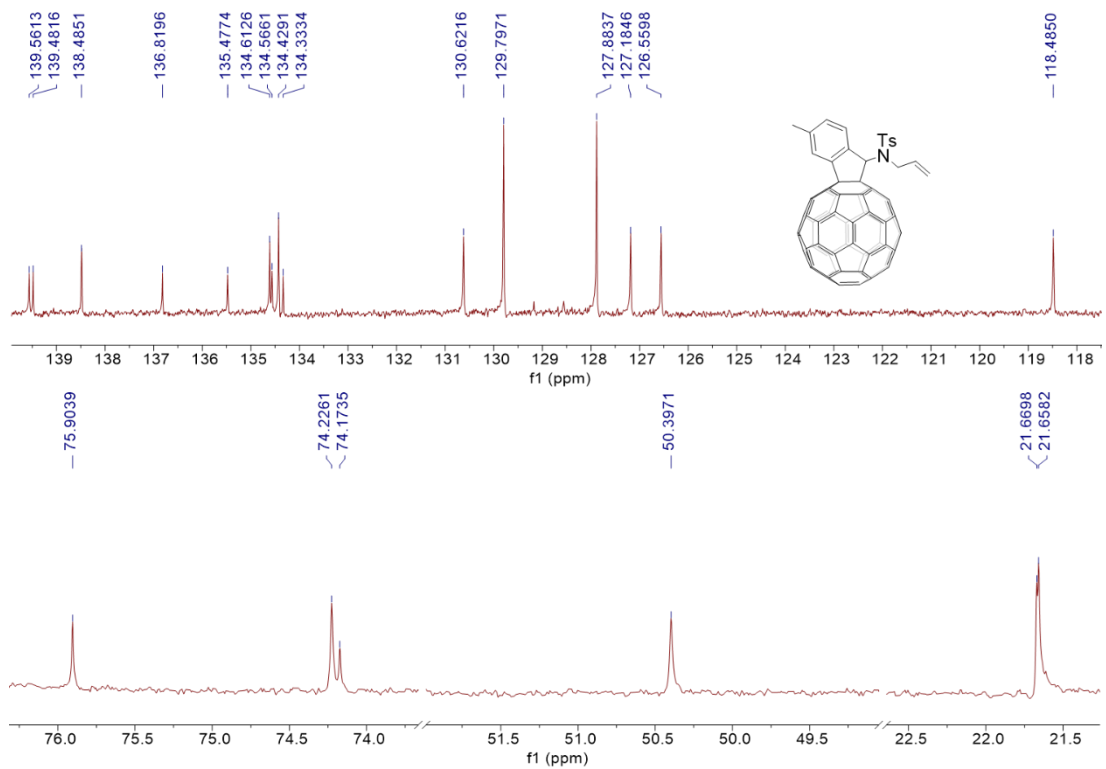

Fig. S29 Expanded  $^{13}\text{C}$  NMR (101 MHz,  $\text{CDCl}_3$ ) of compound **3ae**.

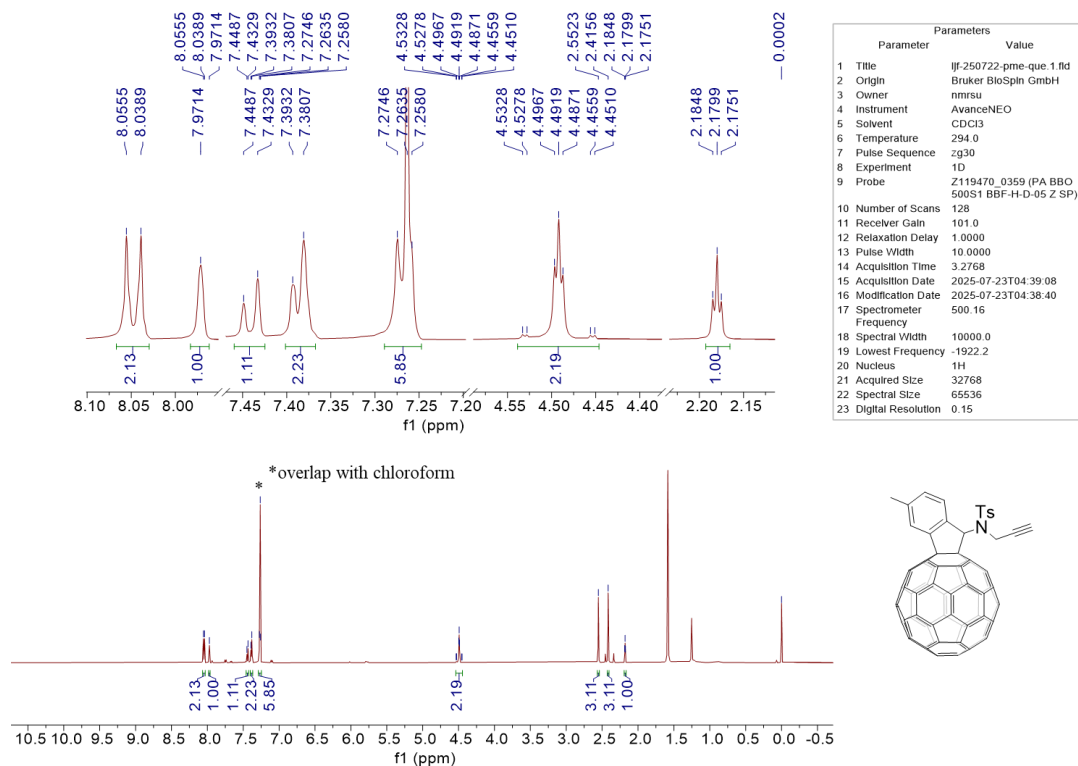

Fig. S30  $^1\text{H}$  NMR (500 MHz,  $\text{CDCl}_3$ ) of compound 3af.

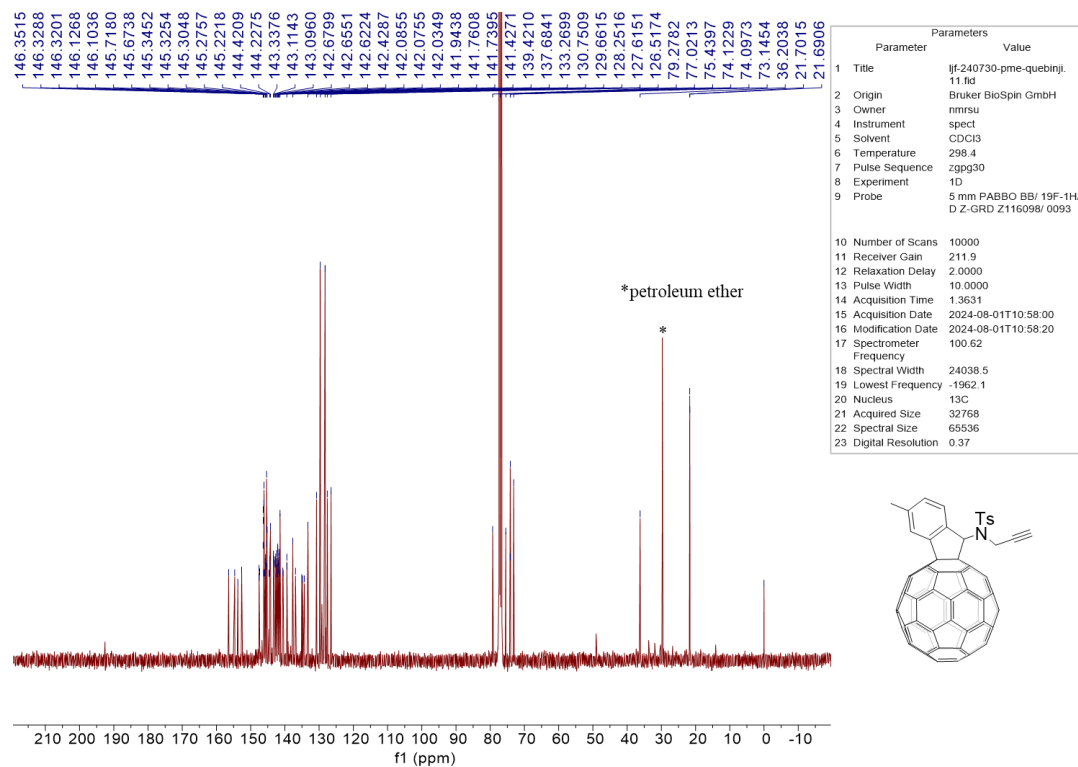

Fig. S31  $^{13}\text{C}$  NMR (101 MHz,  $\text{CDCl}_3$ ) of compound 3af.

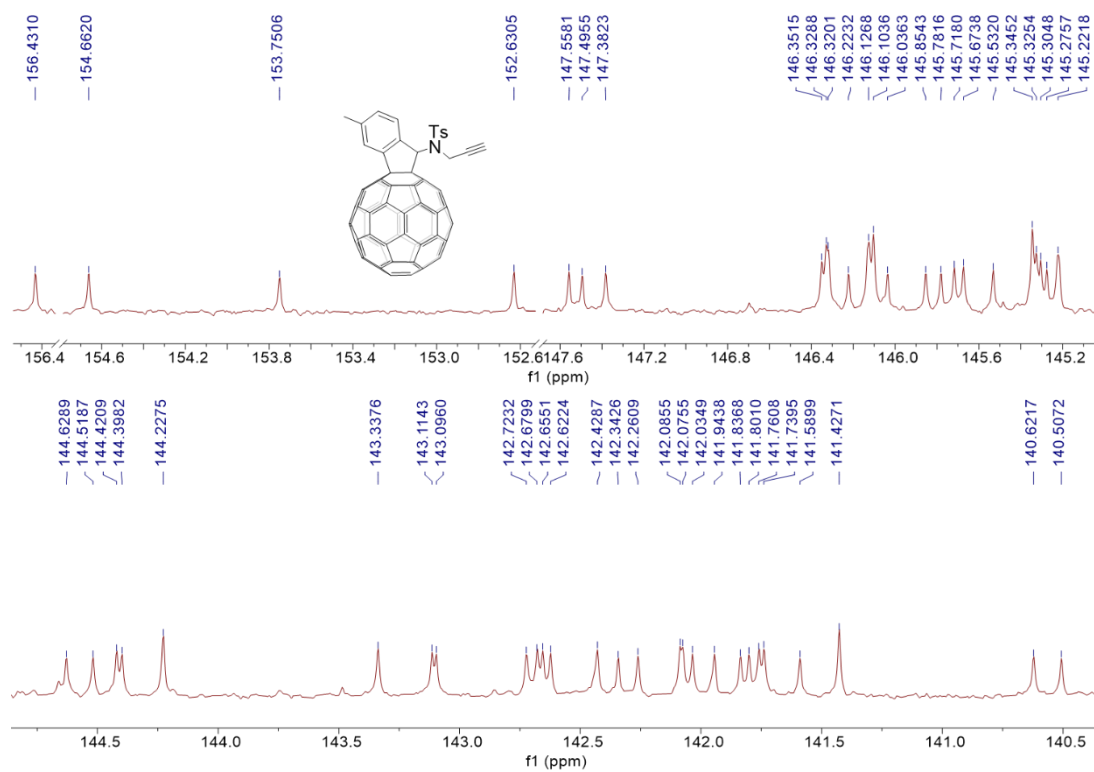

**Fig. S32** Expanded  $^{13}\text{C}$  NMR (101 MHz,  $\text{CDCl}_3$ ) of compound **3af**.

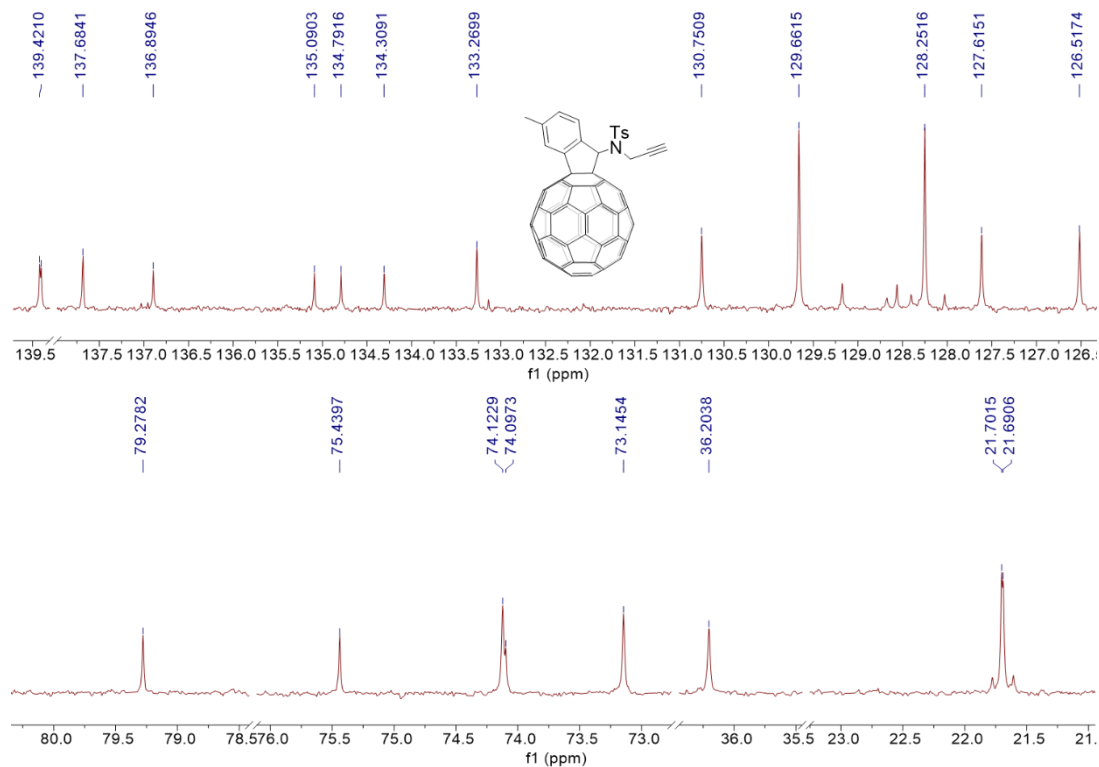

**Fig. S33** Expanded  $^{13}\text{C}$  NMR (101 MHz,  $\text{CDCl}_3$ ) of compound **3af**.

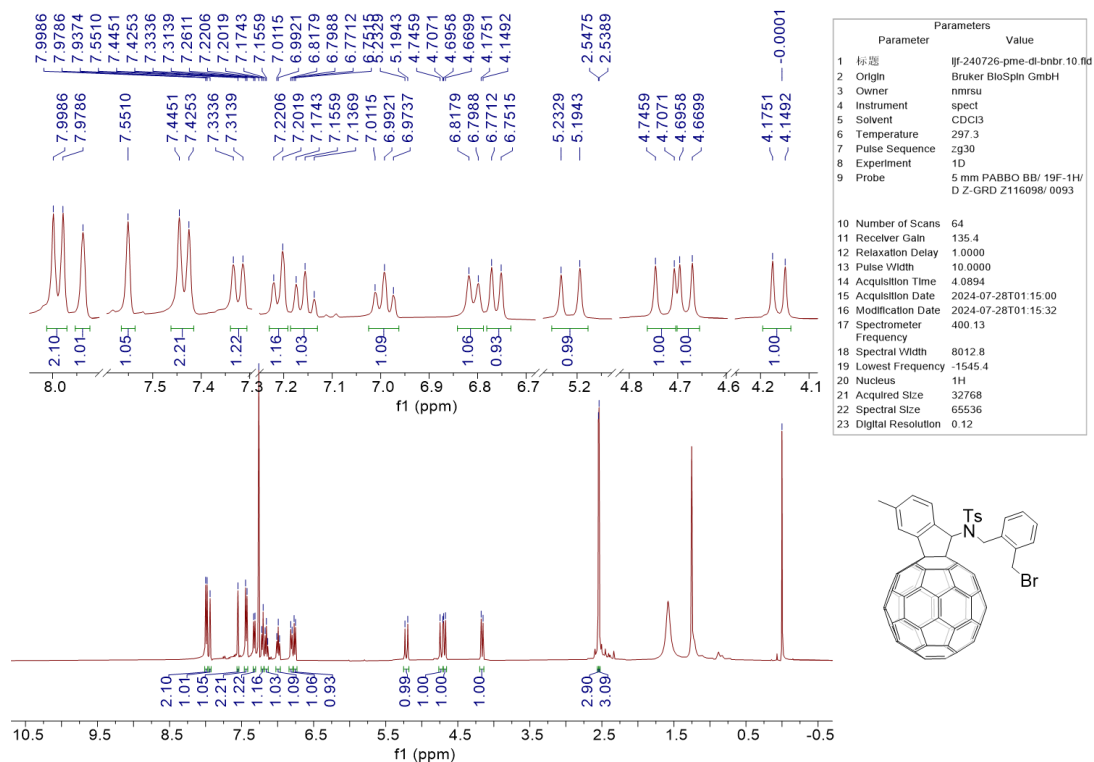

Fig. S34  $^1\text{H}$  NMR (400 MHz,  $\text{CDCl}_3$ ) of compound **3ag**.

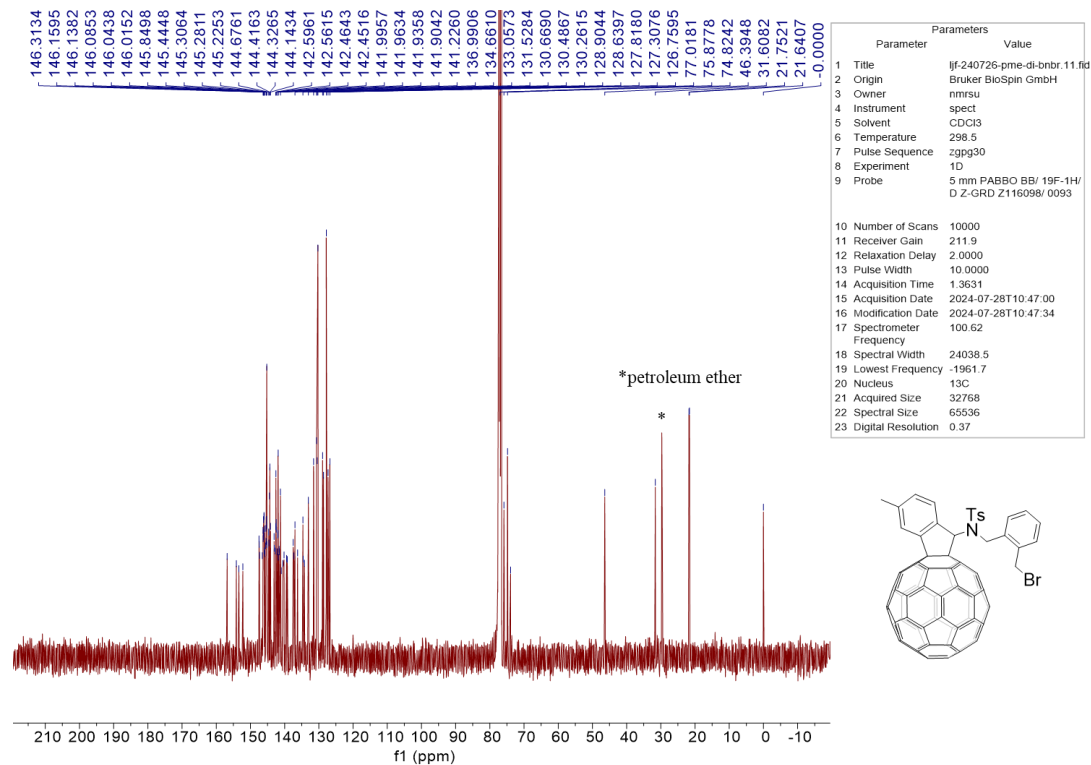

Fig. S35  $^{13}\text{C}$  NMR (101 MHz,  $\text{CDCl}_3$ ) of compound **3ag**.

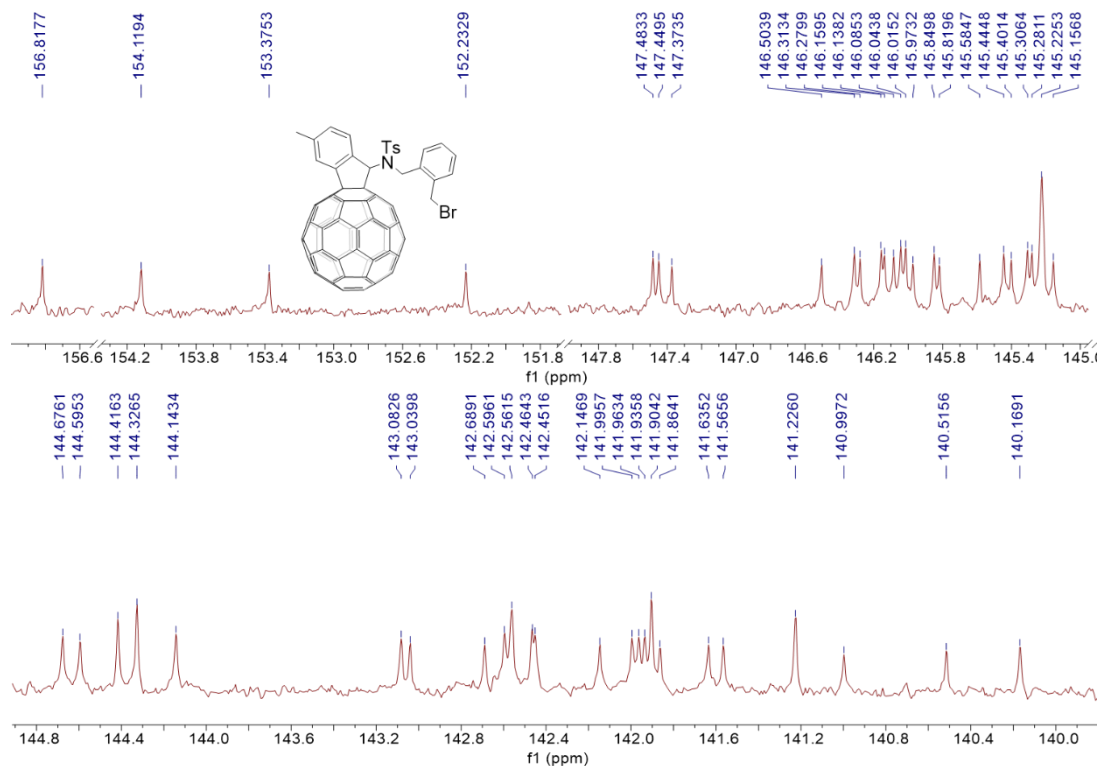

**Fig. S36** Expanded  $^{13}\text{C}$  NMR (101 MHz,  $\text{CDCl}_3$ ) of compound **3ag**.

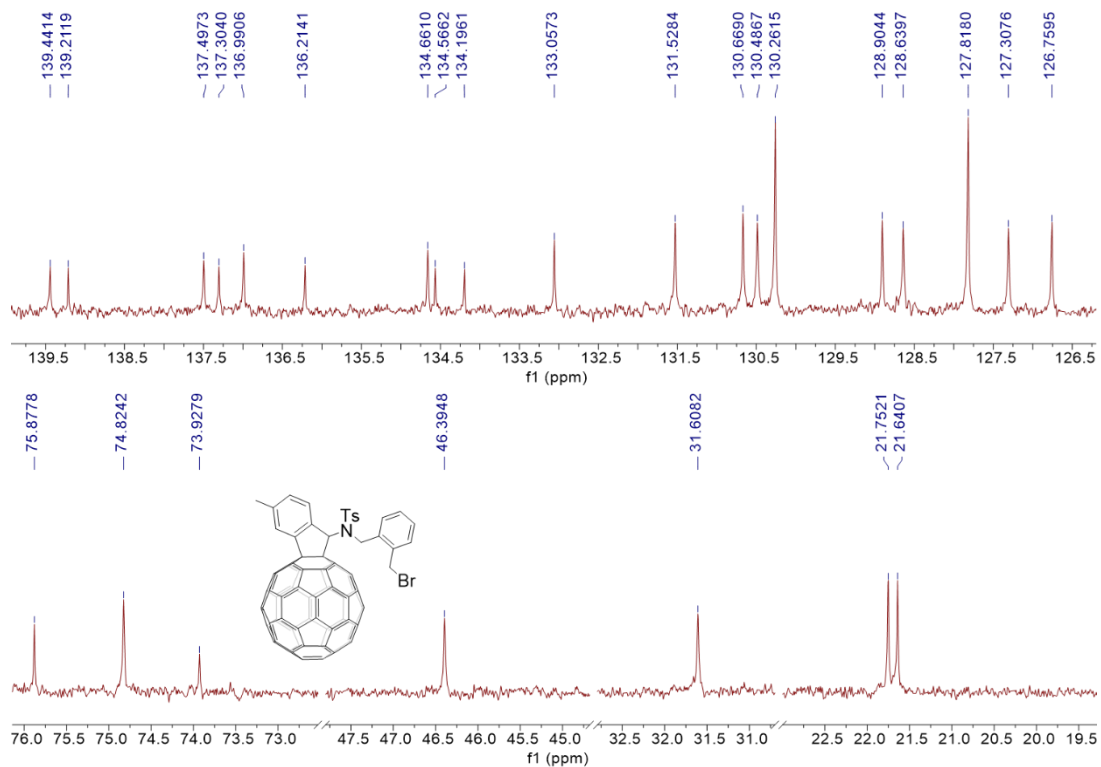

**Fig. S37** Expanded  $^{13}\text{C}$  NMR (101 MHz,  $\text{CDCl}_3$ ) of compound **3ag**.

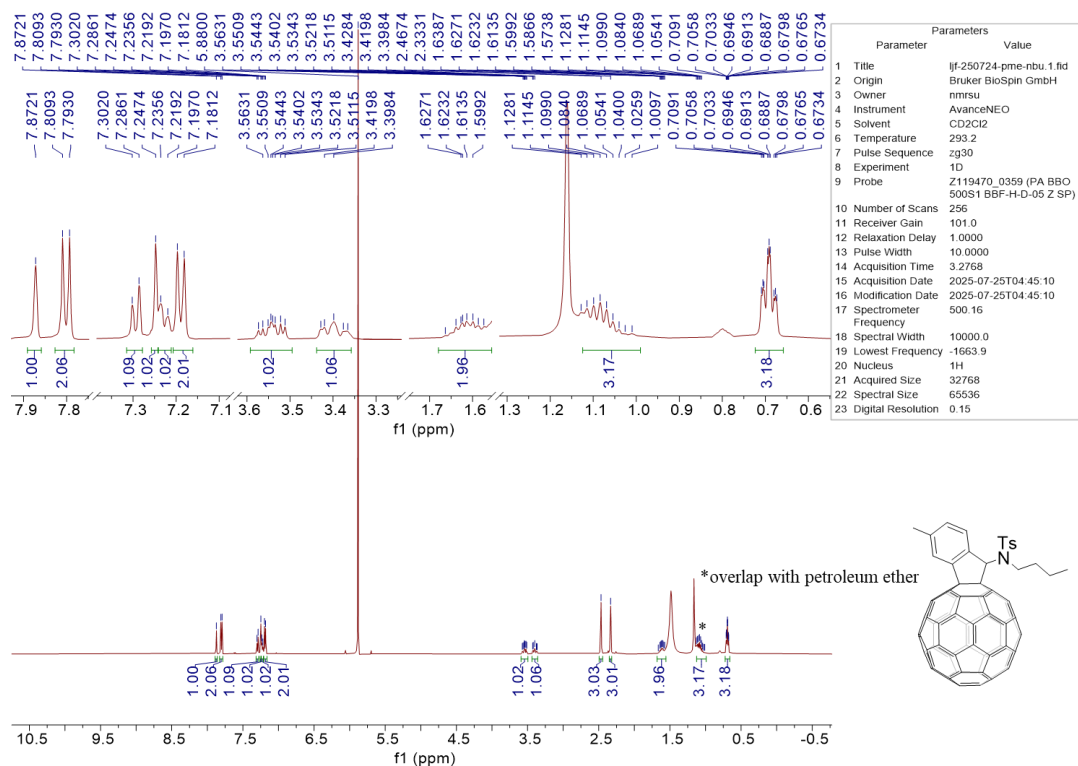

**Fig. S38**  $^1\text{H}$  NMR (500 MHz, 1:1  $\text{CS}_2/\text{CDCl}_2\text{CDCl}_2$ ) of compound **3ah**.

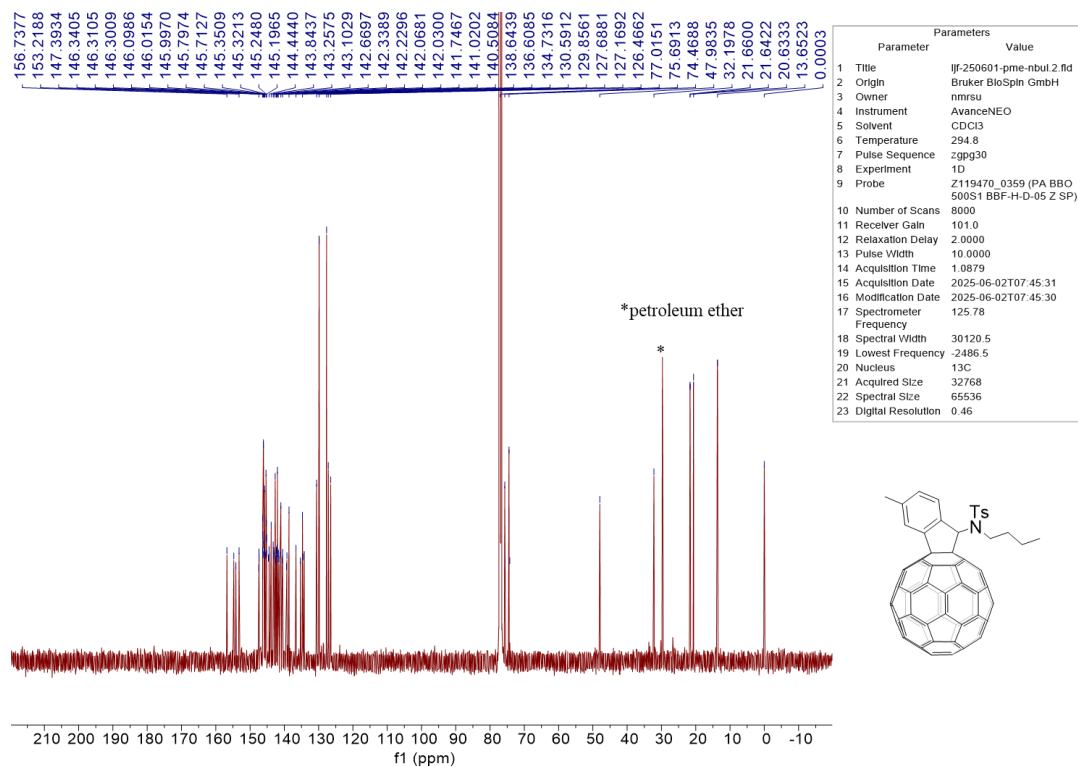

**Fig. S39**  $^{13}\text{C}$  NMR (126 MHz,  $\text{CDCl}_3$ ) of compound **3ah**.

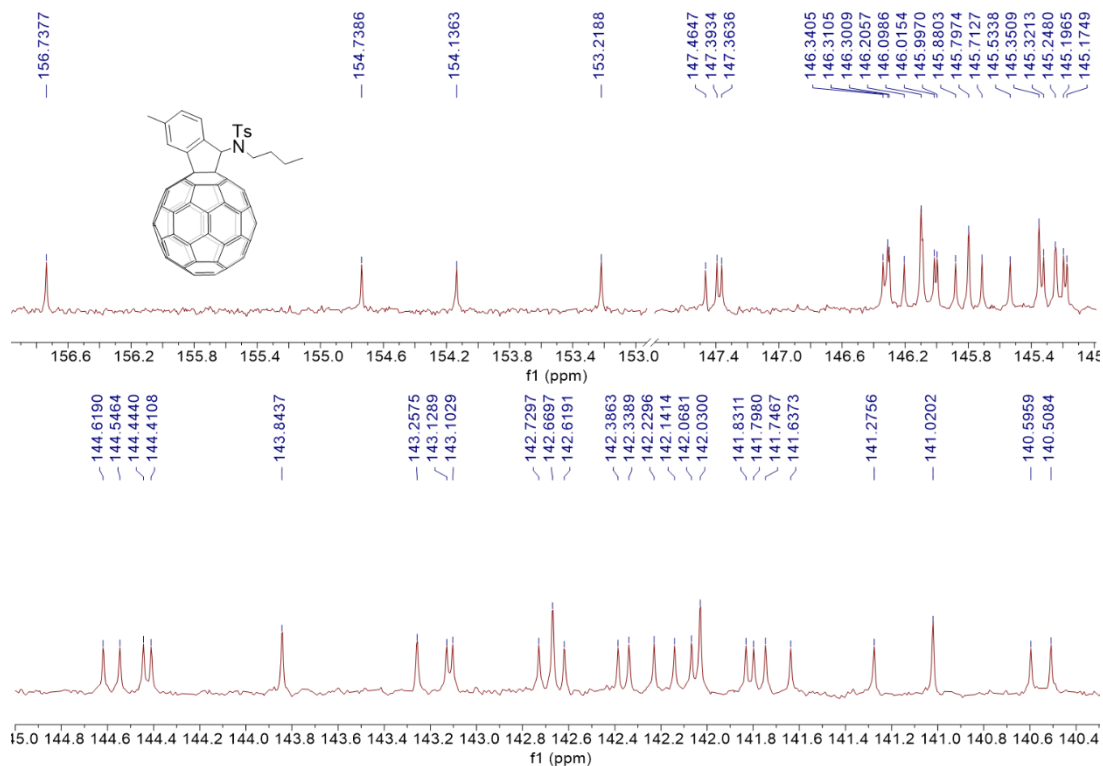

**Fig. S40** Expanded  $^{13}\text{C}$  NMR (126 MHz,  $\text{CDCl}_3$ ) of compound **3ah**.

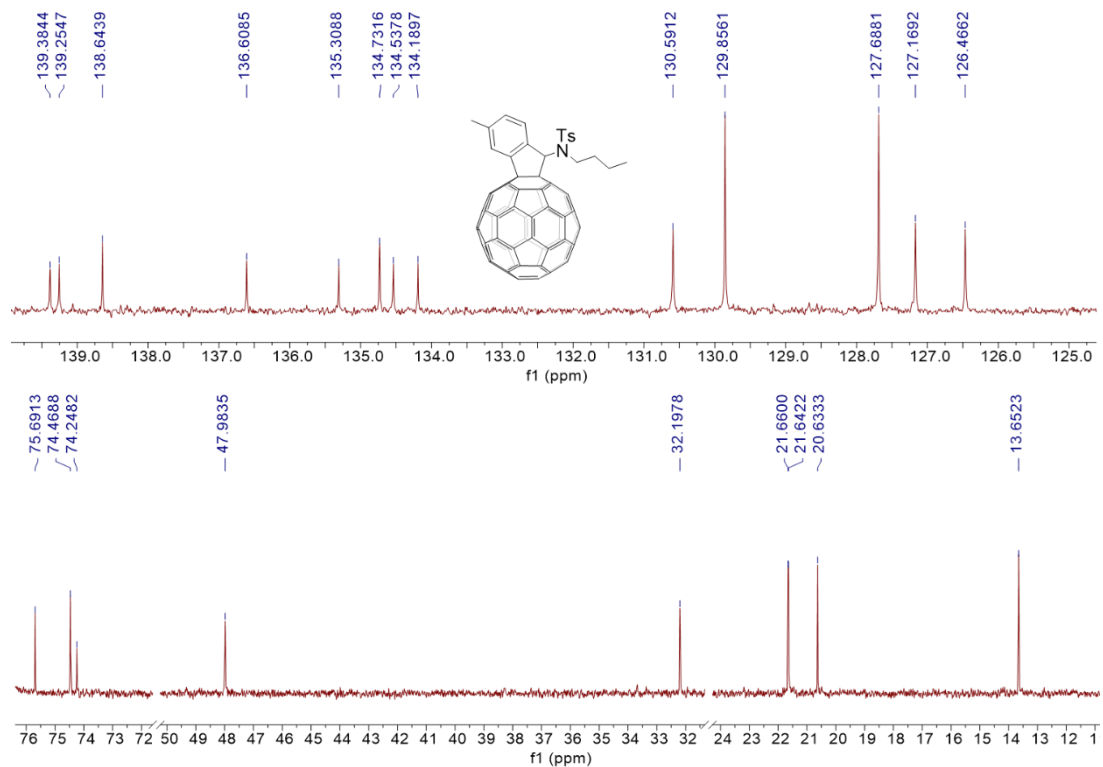

**Fig. S41** Expanded  $^{13}\text{C}$  NMR (126 MHz,  $\text{CDCl}_3$ ) of compound **3ah**.

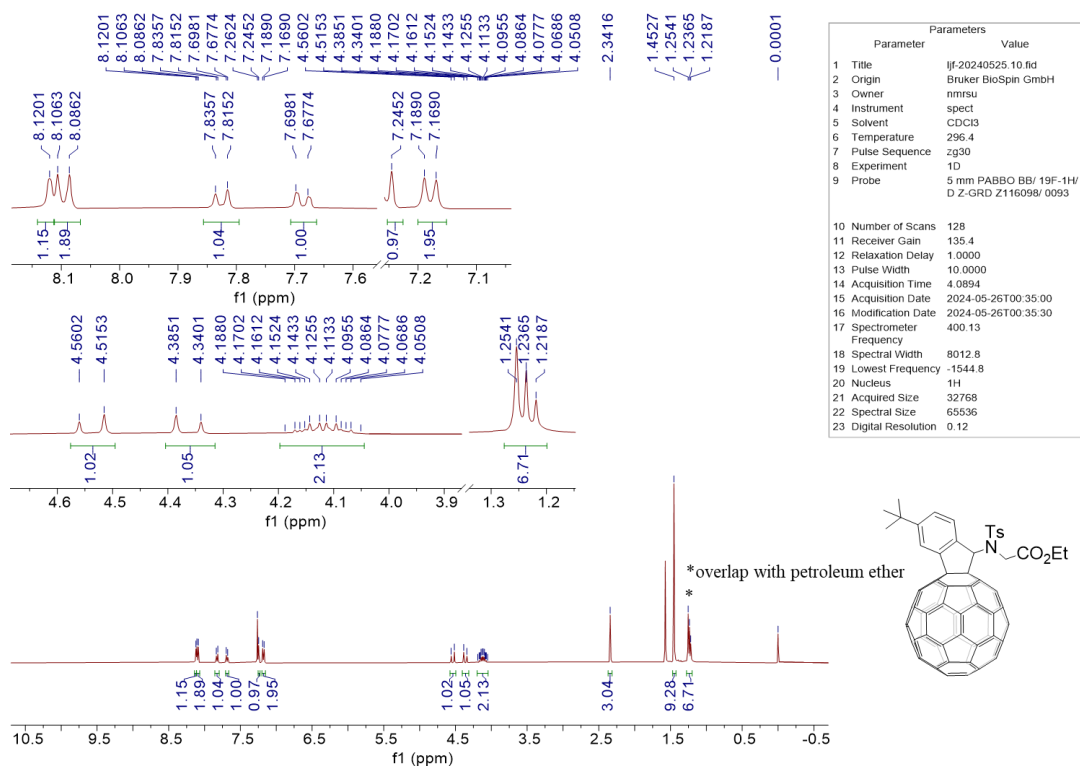

Fig. S42  $^1\text{H}$  NMR (400 MHz,  $\text{CDCl}_3$ ) of compound **3bd**.

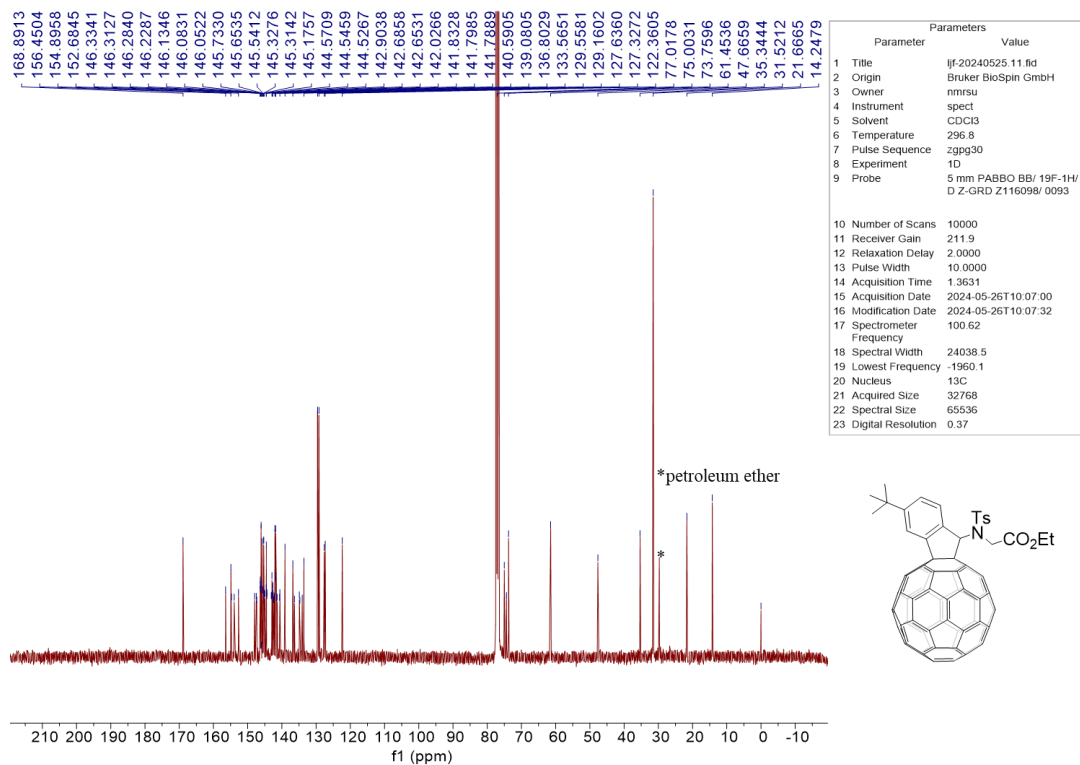

Fig. S43  $^{13}\text{C}$  NMR (101 MHz,  $\text{CDCl}_3$ ) of compound **3bd**.

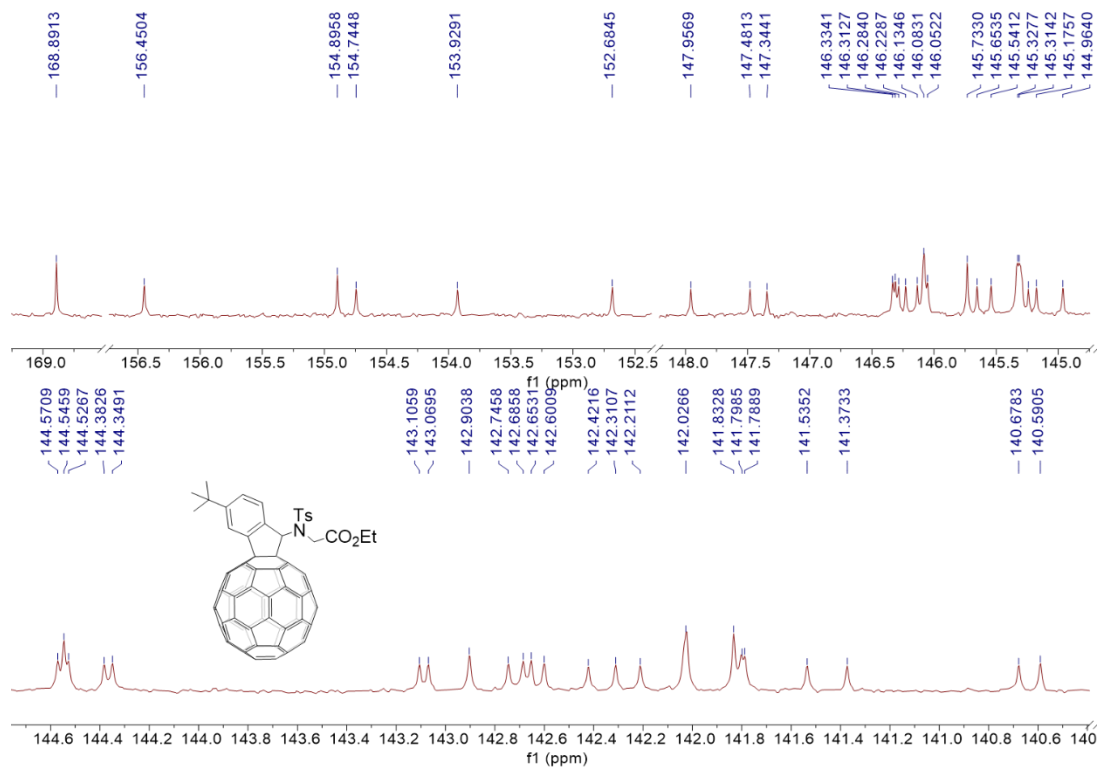

**Fig. S44** Expanded  $^{13}\text{C}$  NMR (101 MHz,  $\text{CDCl}_3$ ) of compound **3bd**.

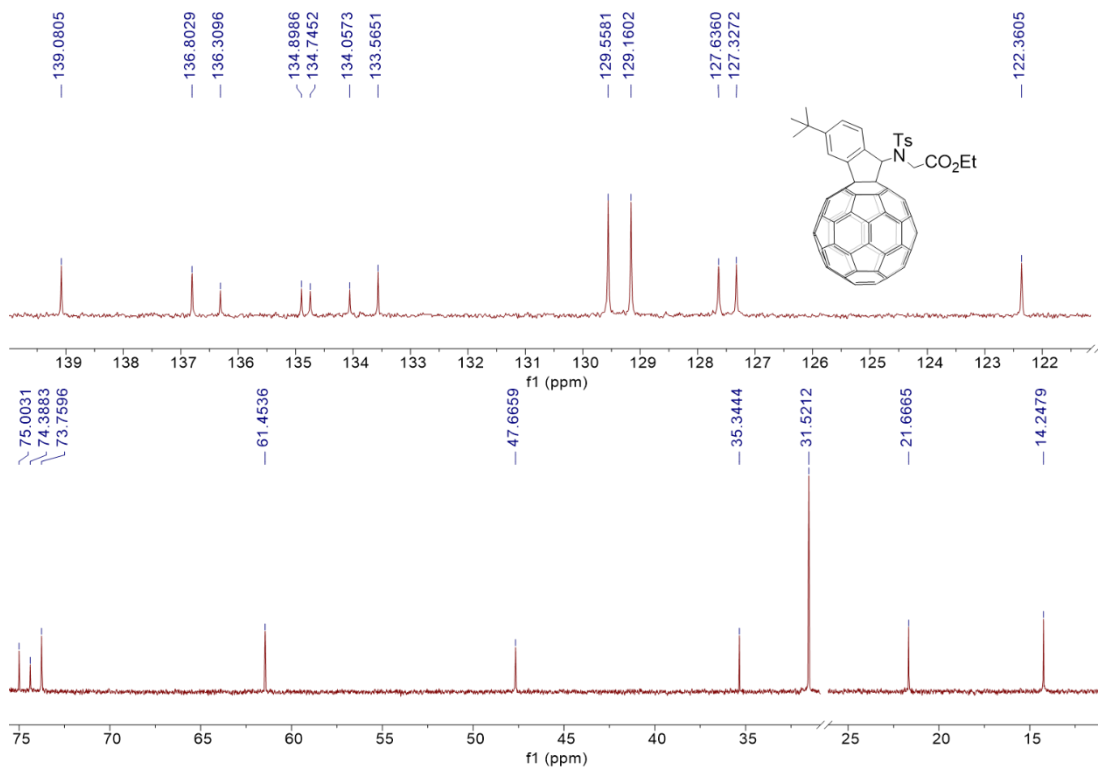

**Fig. S45** Expanded  $^{13}\text{C}$  NMR (101 MHz,  $\text{CDCl}_3$ ) of compound **3bd**.

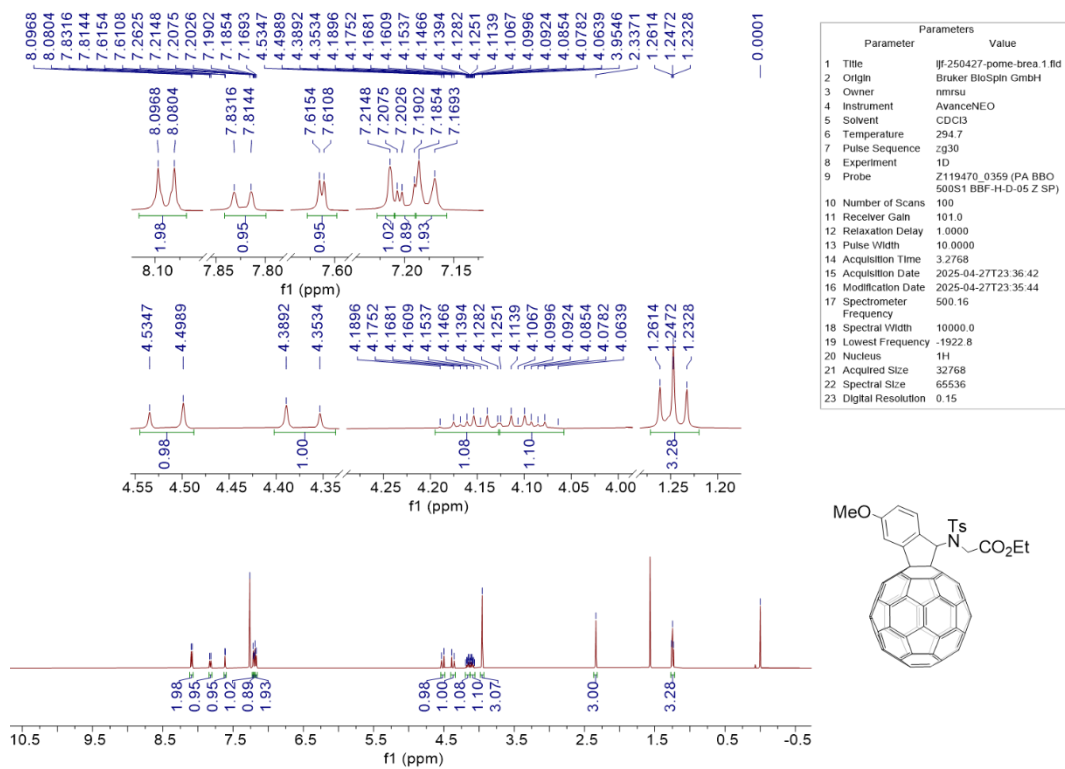

Fig. S46  $^1\text{H}$  NMR (500 MHz,  $\text{CDCl}_3$ ) of compound **3cd**.

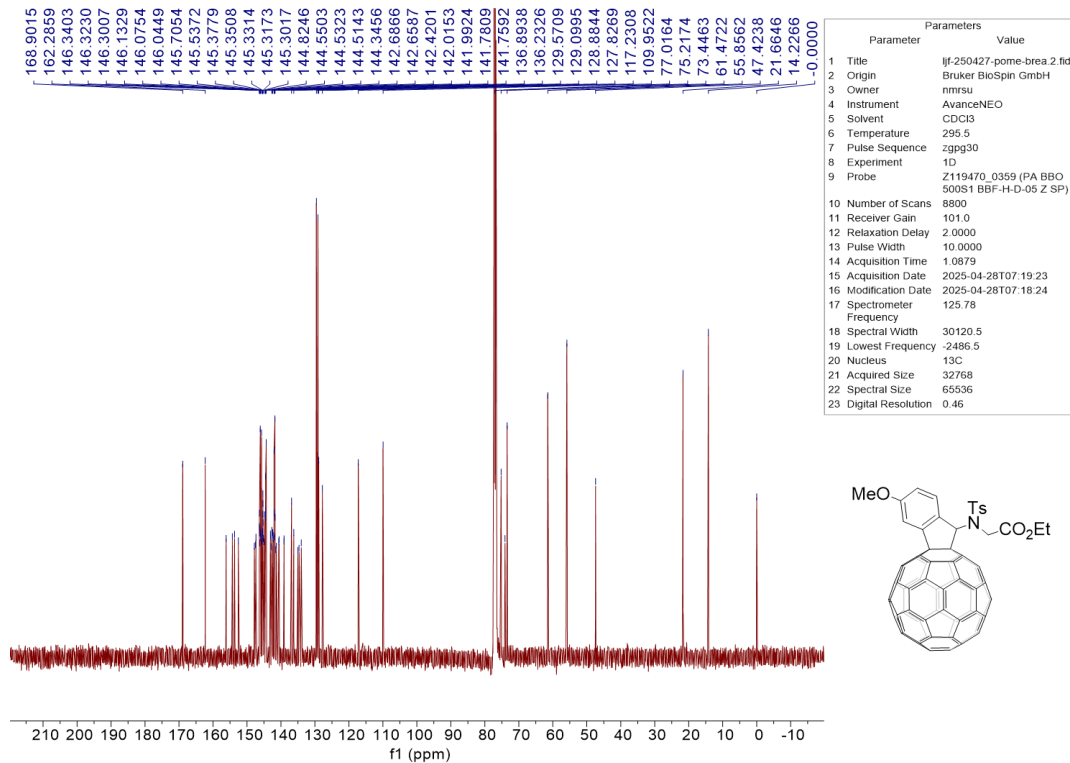

Fig. S47  $^{13}\text{C}$  NMR (126 MHz,  $\text{CDCl}_3$ ) of compound **3cd**.

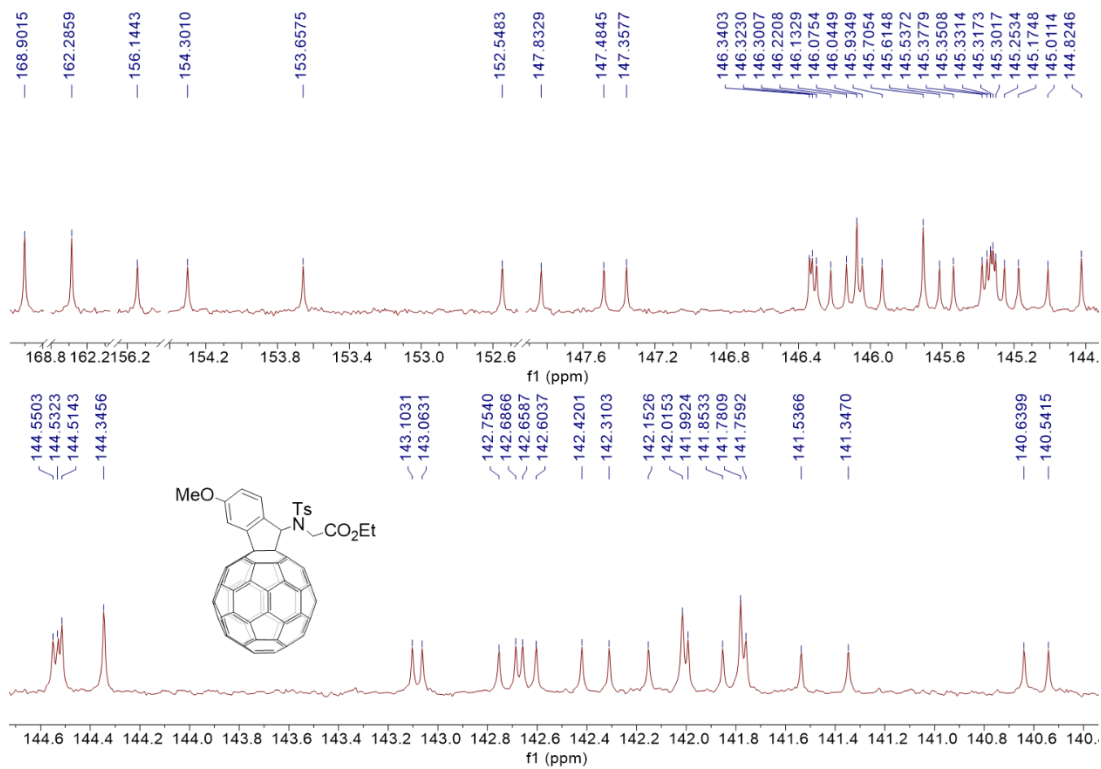

Fig. S48 Expanded  $^{13}\text{C}$  NMR (126 MHz,  $\text{CDCl}_3$ ) of compound 3cd.

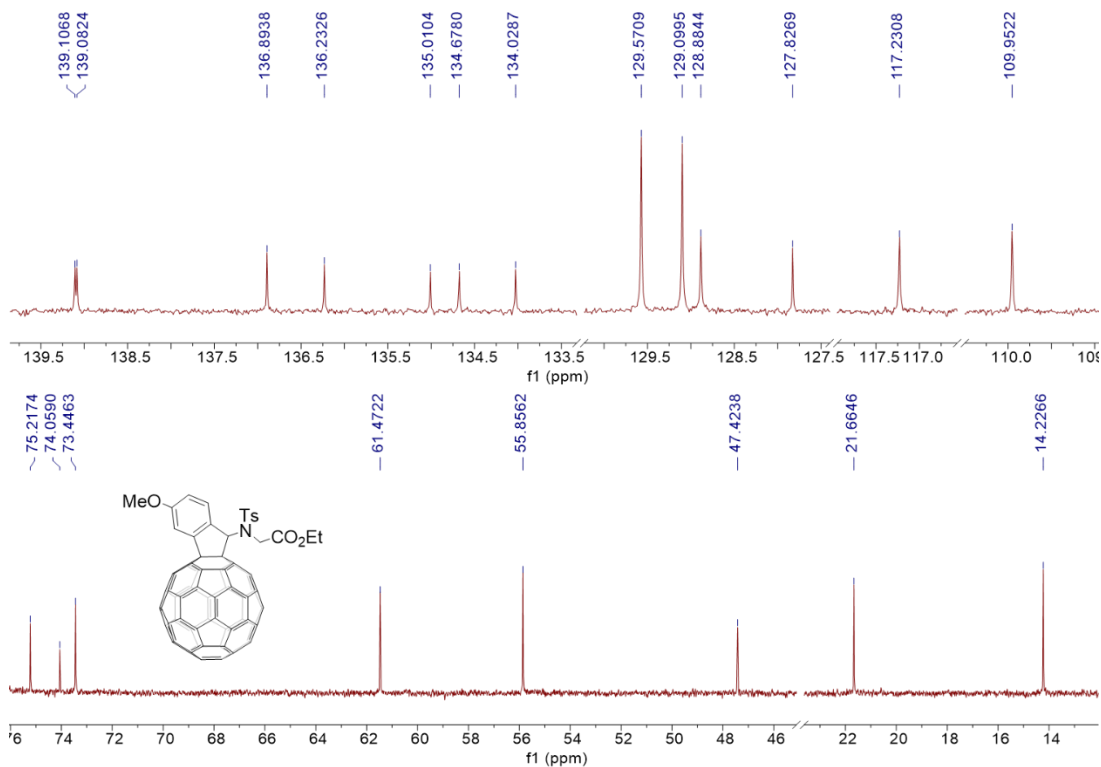

Fig. S49 Expanded  $^{13}\text{C}$  NMR (126 MHz,  $\text{CDCl}_3$ ) of compound 3cd.



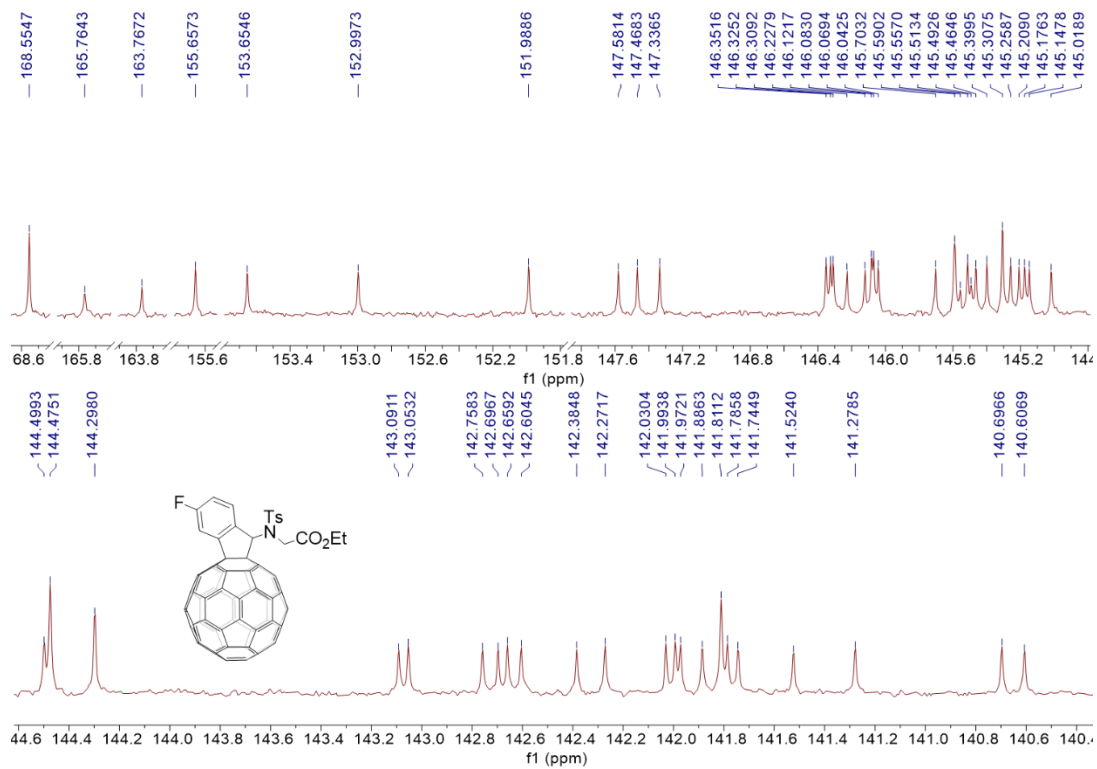

**Fig. S52** Expanded  $^{13}\text{C}$  NMR (126 MHz, 1:1  $\text{CS}_2/\text{CDCl}_3$ ) of compound **3dd**.

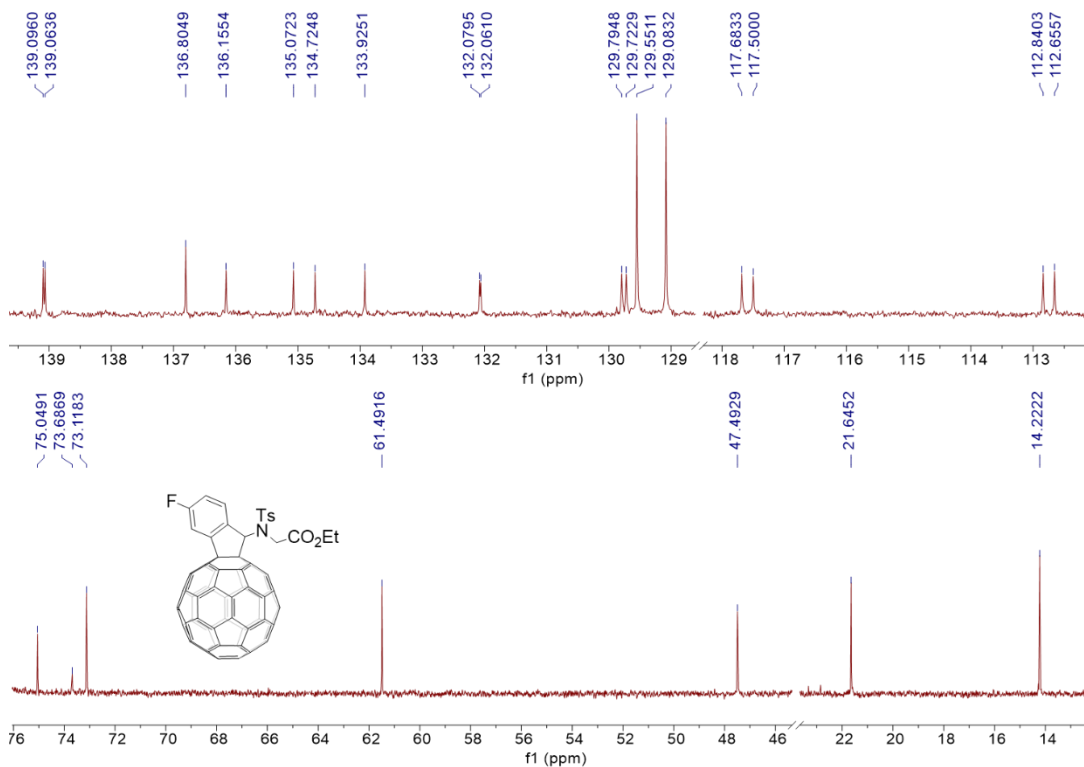

**Fig. S53** Expanded  $^{13}\text{C}$  NMR (126 MHz, 1:1  $\text{CS}_2/\text{CDCl}_3$ ) of compound **3dd**.

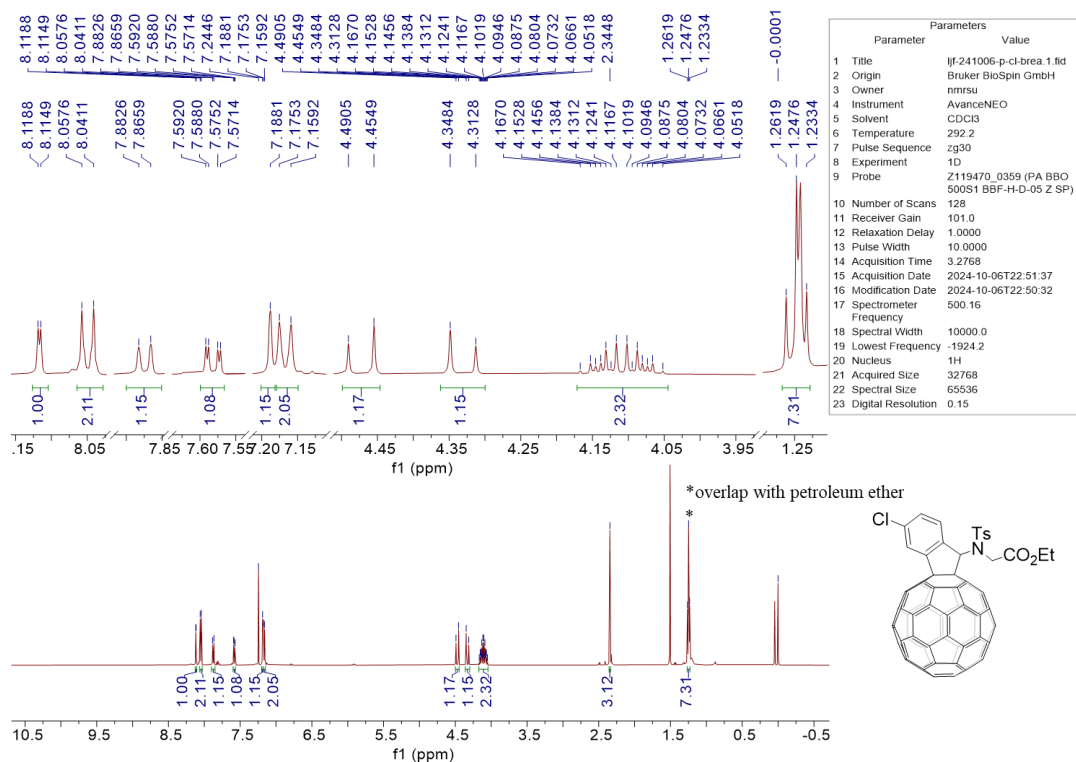

**Fig. S54**  $^1\text{H}$  NMR (500 MHz, 1:1  $\text{CS}_2/\text{CDCl}_3$ ) of compound **3ed**.

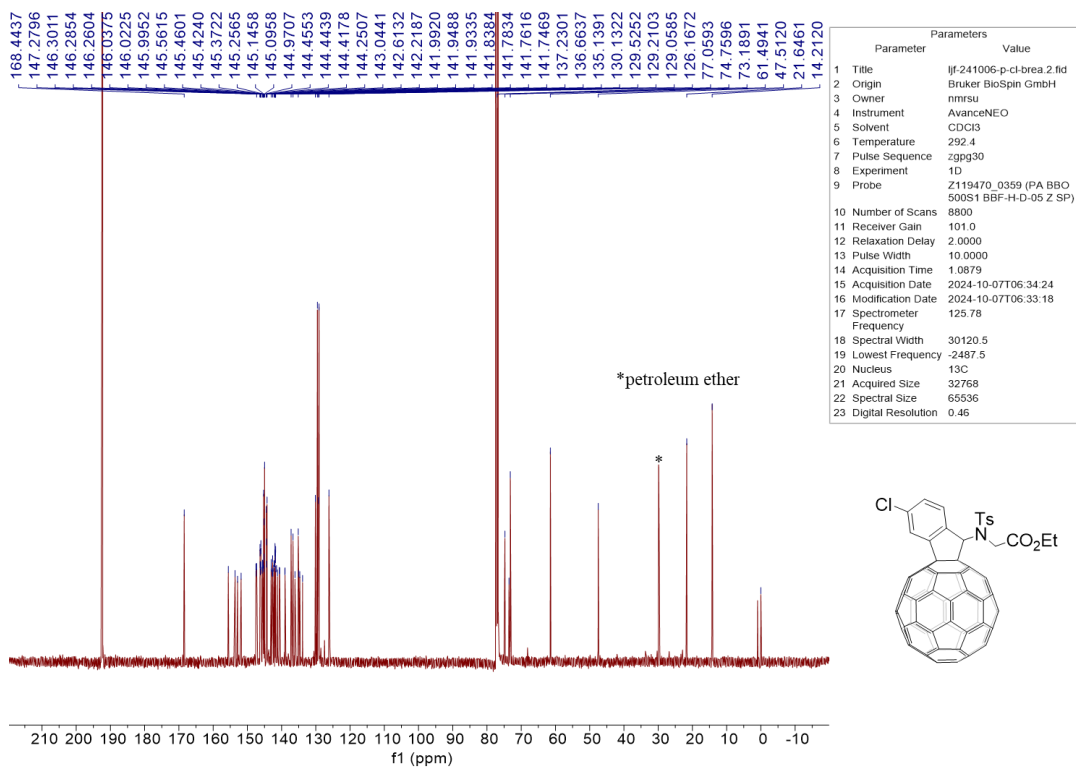

**Fig. S55**  $^{13}\text{C}$  NMR (126 MHz, 1:1  $\text{CS}_2/\text{CDCl}_3$ ) of compound **3ed**.

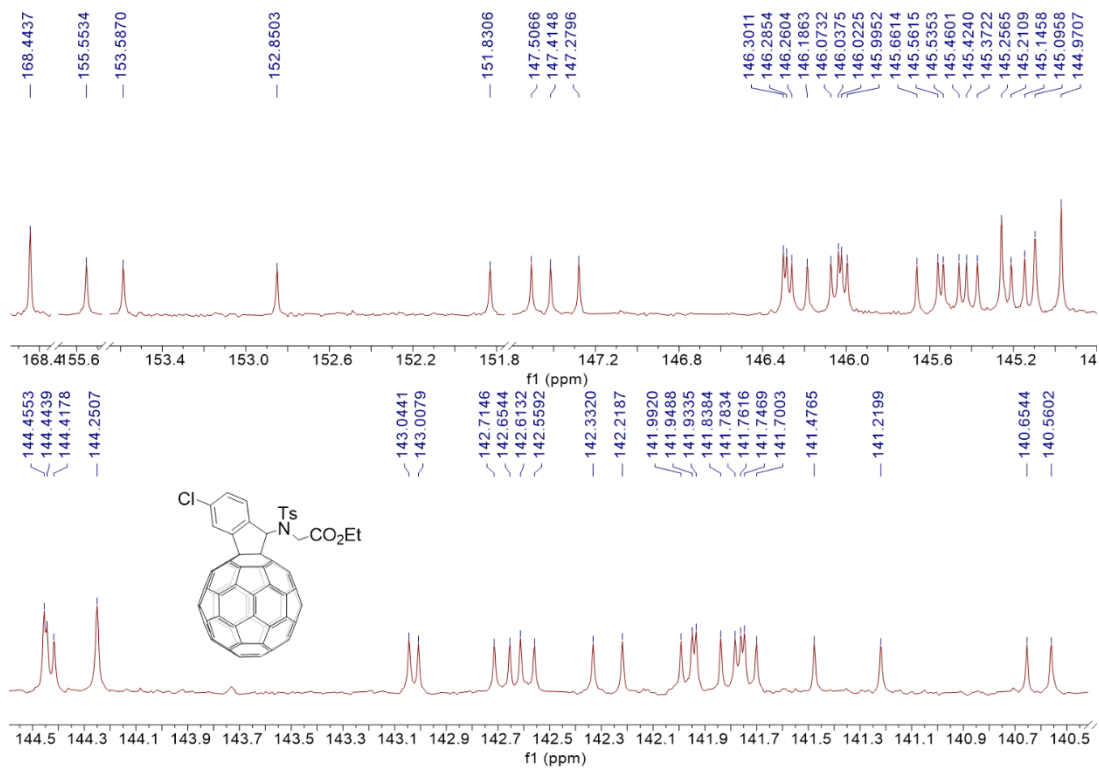

**Fig. S56** Expanded <sup>13</sup>C NMR (126 MHz, 1:1 CS<sub>2</sub>/CDCl<sub>3</sub>) of compound **3ed**.

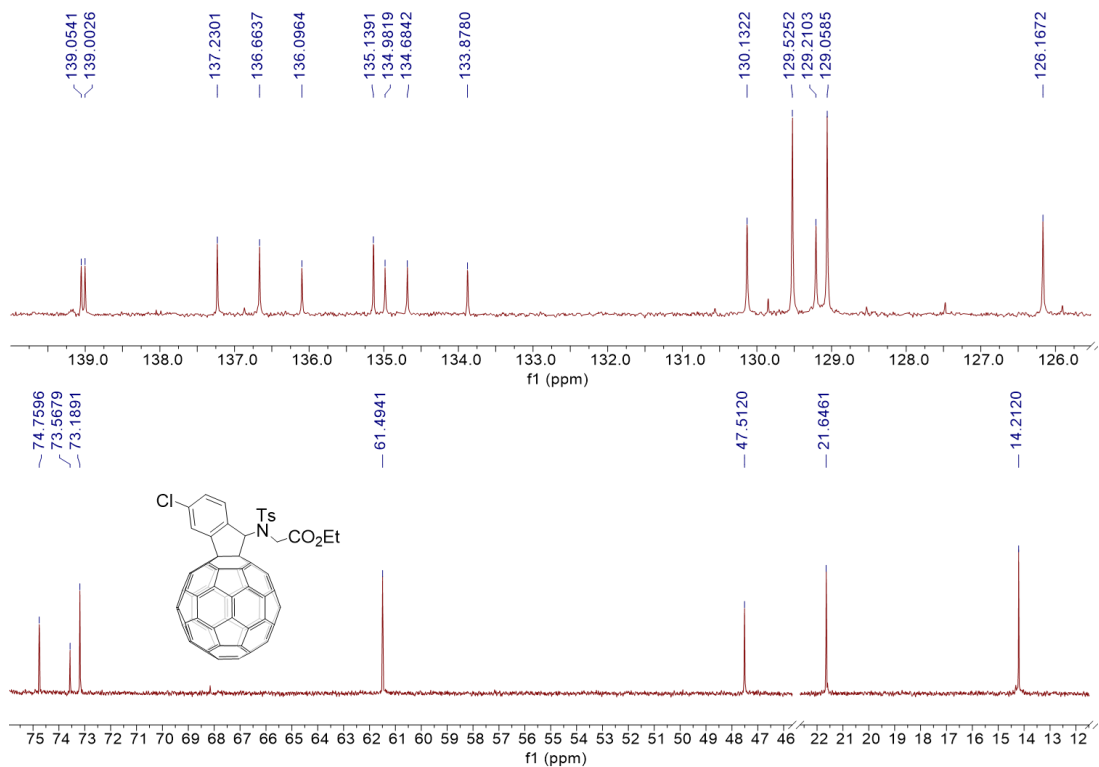

**Fig. S57** Expanded <sup>13</sup>C NMR (126 MHz, 1:1 CS<sub>2</sub>/CDCl<sub>3</sub>) of compound **3ed**.

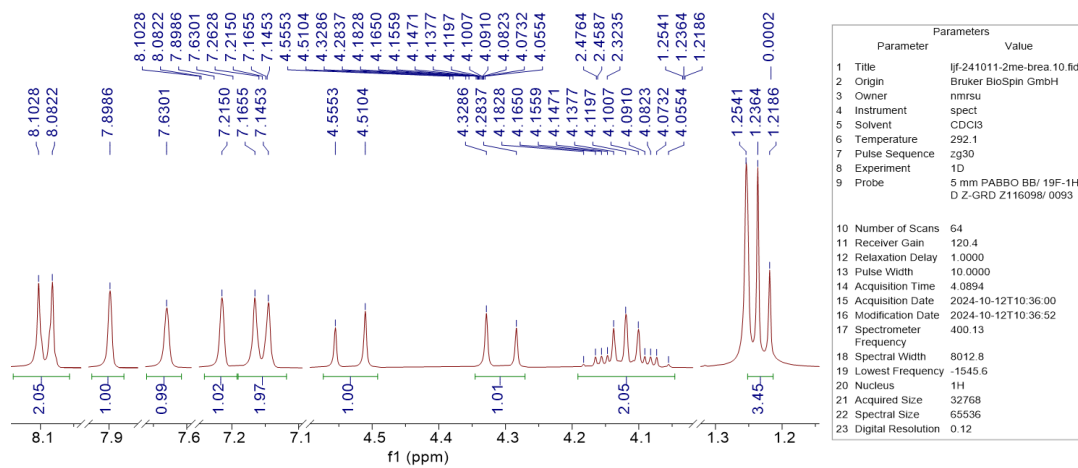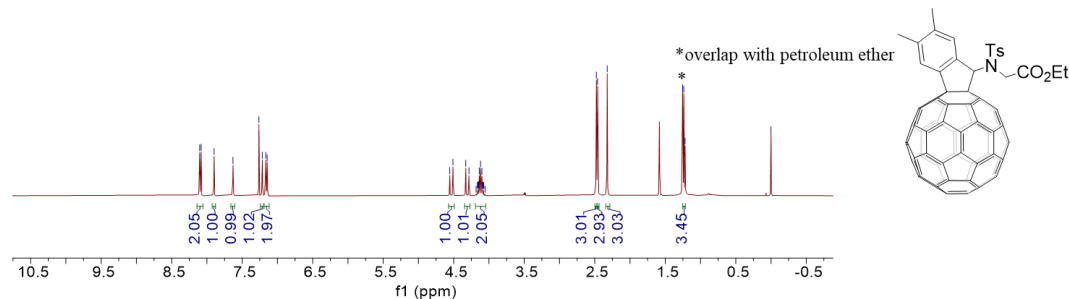

Fig. S58  $^1\text{H}$  NMR (400 MHz,  $\text{CDCl}_3$ ) of compound 3fd.

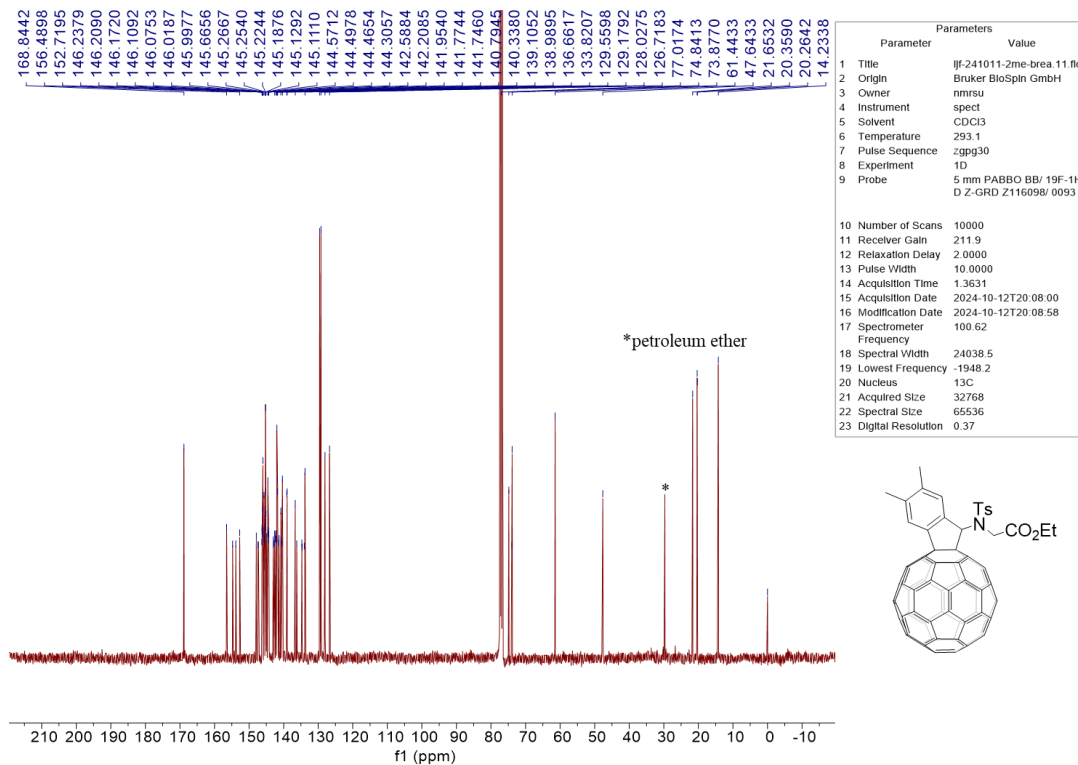

Fig. S59  $^{13}\text{C}$  NMR (101 MHz,  $\text{CDCl}_3$ ) of compound 3fd.

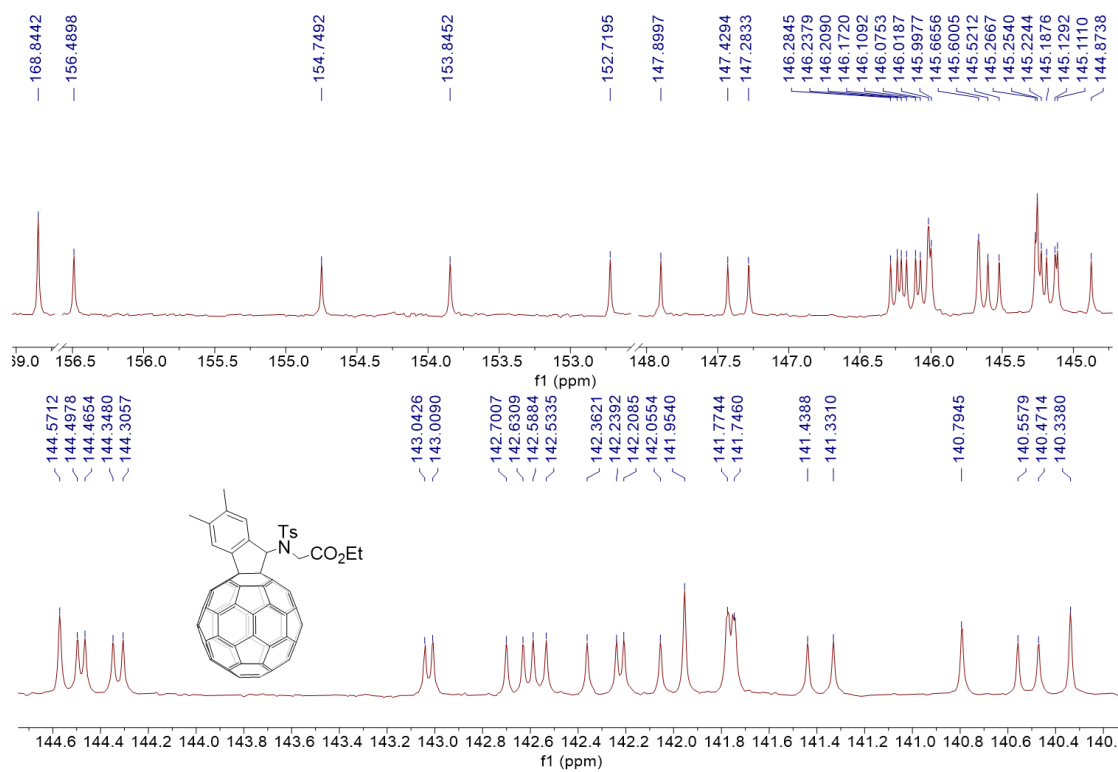

**Fig. S60** Expanded  $^{13}\text{C}$  NMR (101 MHz,  $\text{CDCl}_3$ ) of compound **3fd**.

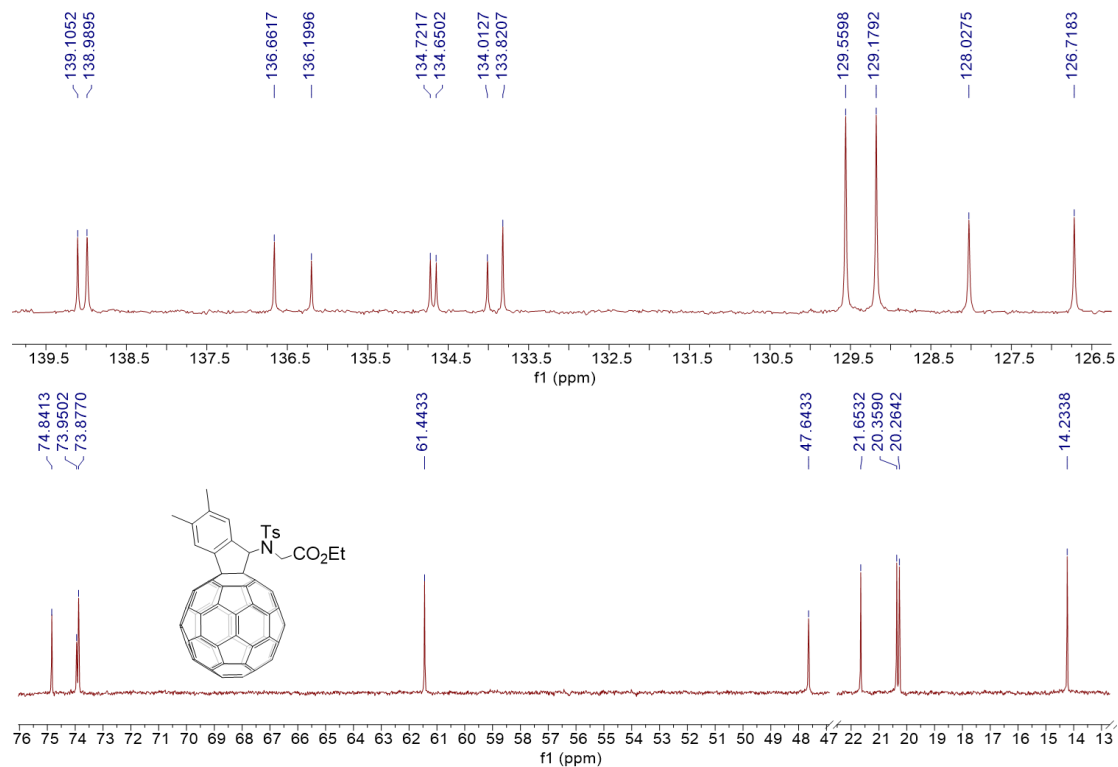

**Fig. S61** Expanded  $^{13}\text{C}$  NMR (101 MHz,  $\text{CDCl}_3$ ) of compound **3fd**.

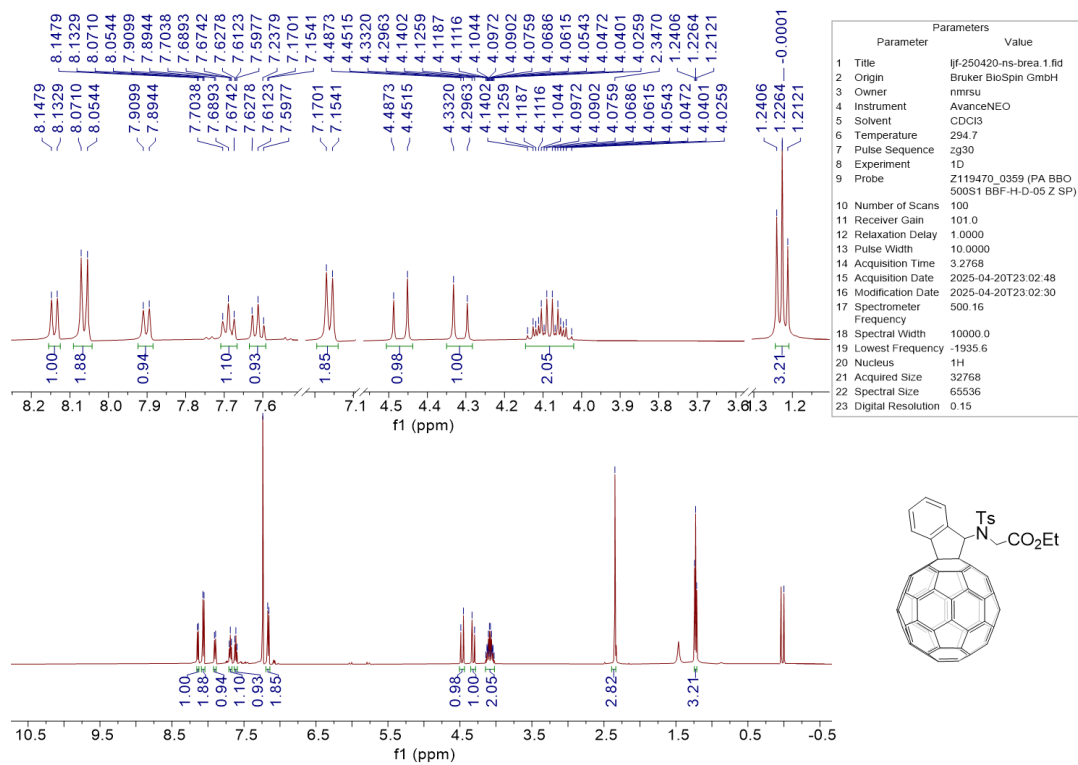

Fig. S62 <sup>1</sup>H NMR (500 MHz, 1:1 CS<sub>2</sub>/CDCl<sub>3</sub>) of compound 3gd.

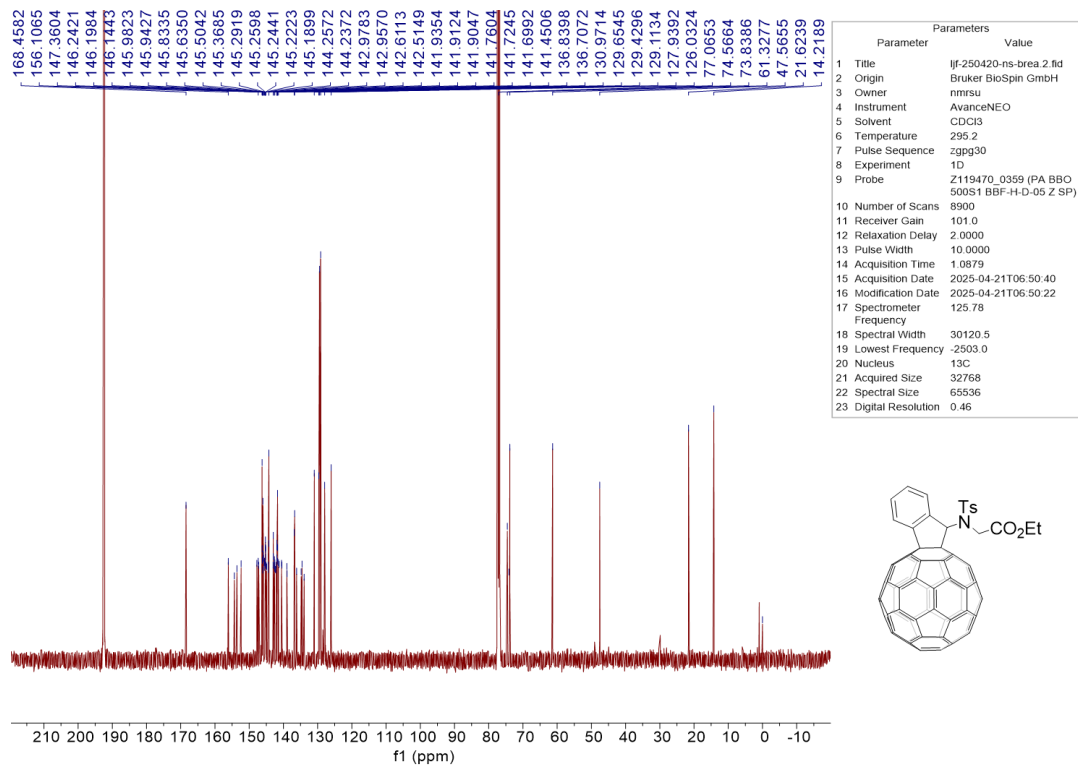

Fig. S63 <sup>13</sup>C NMR (126 MHz, 1:1 CS<sub>2</sub>/CDCl<sub>3</sub>) of compound 3gd.

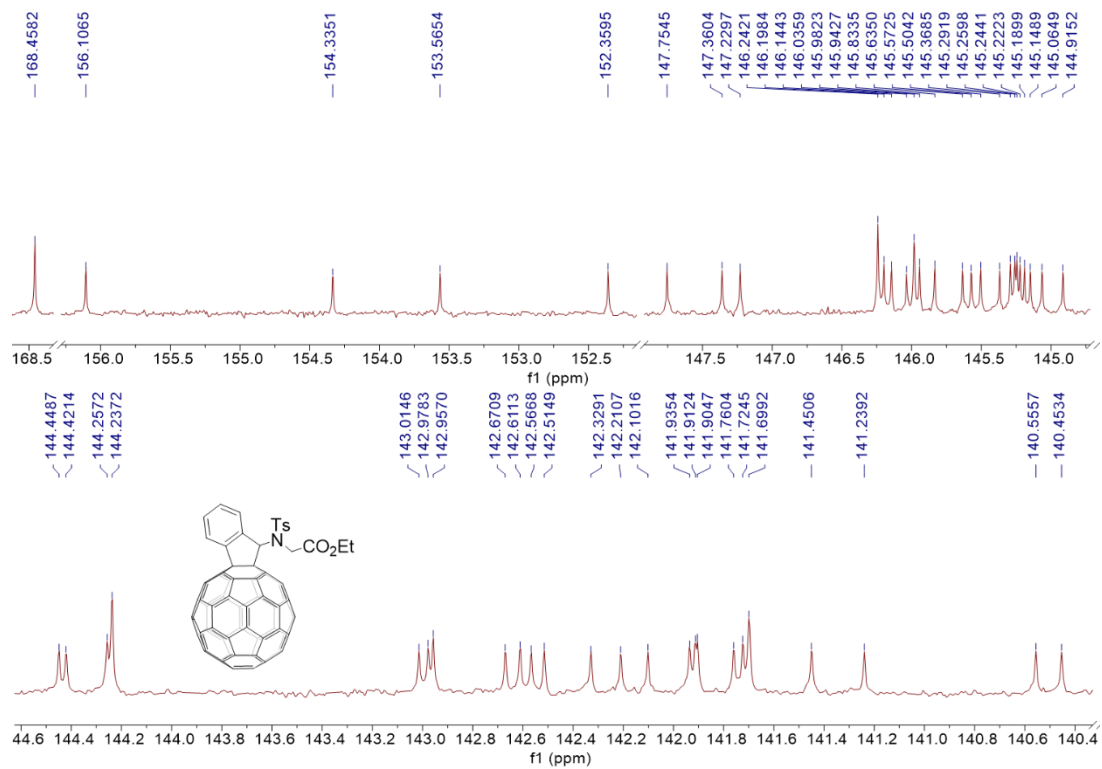

**Fig. S64** Expanded  $^{13}\text{C}$  NMR (126 MHz, 1:1  $\text{CS}_2/\text{CDCl}_3$ ) of compound **3gd**.

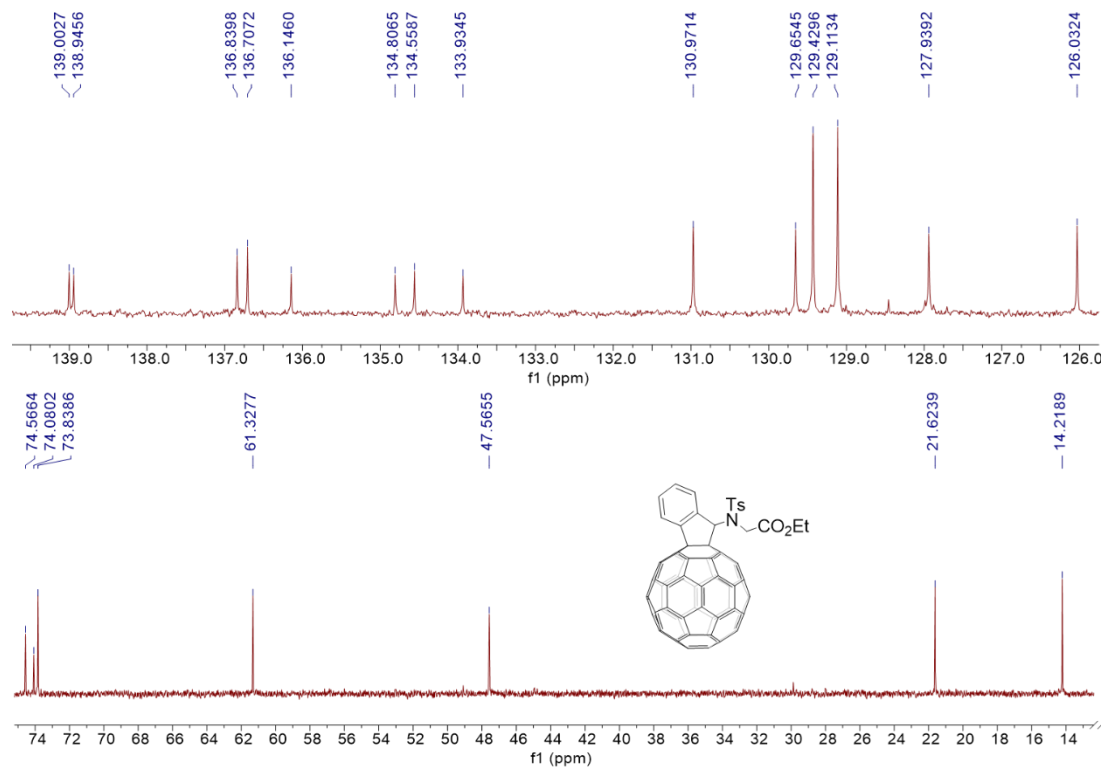

**Fig. S65** Expanded  $^{13}\text{C}$  NMR (126 MHz, 1:1  $\text{CS}_2/\text{CDCl}_3$ ) of compound **3gd**.

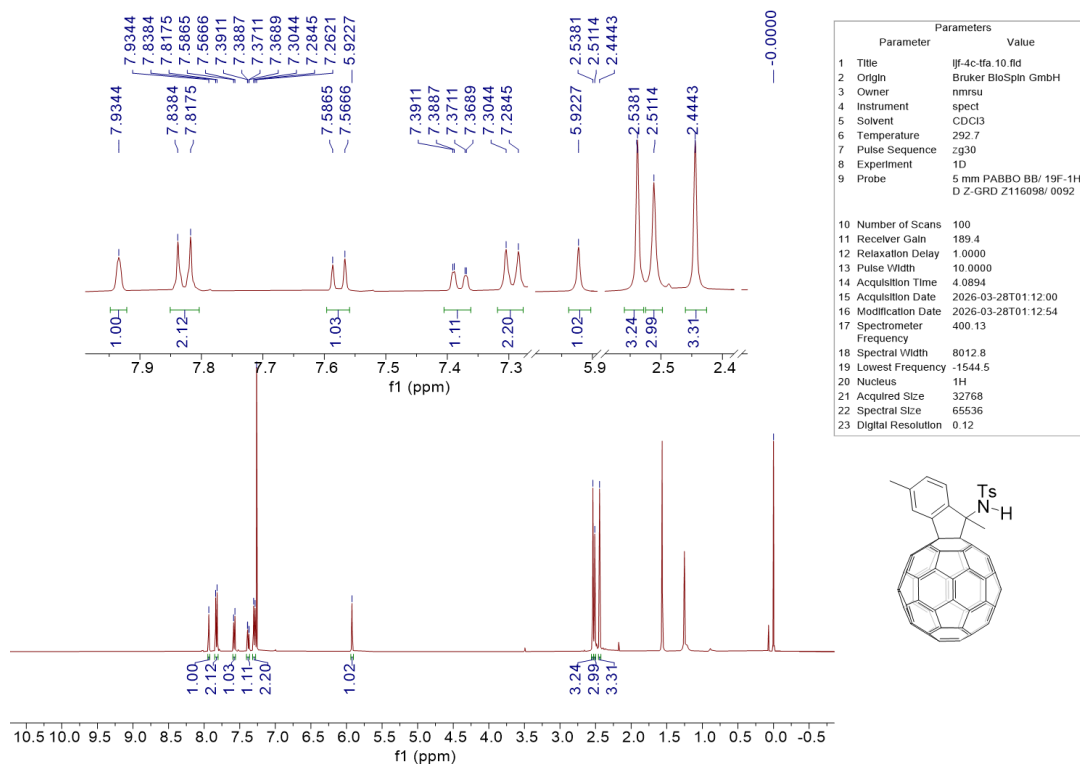

Fig. S66  $^1\text{H}$  NMR (400 MHz,  $\text{CDCl}_3$ ) of compound **3ha**.

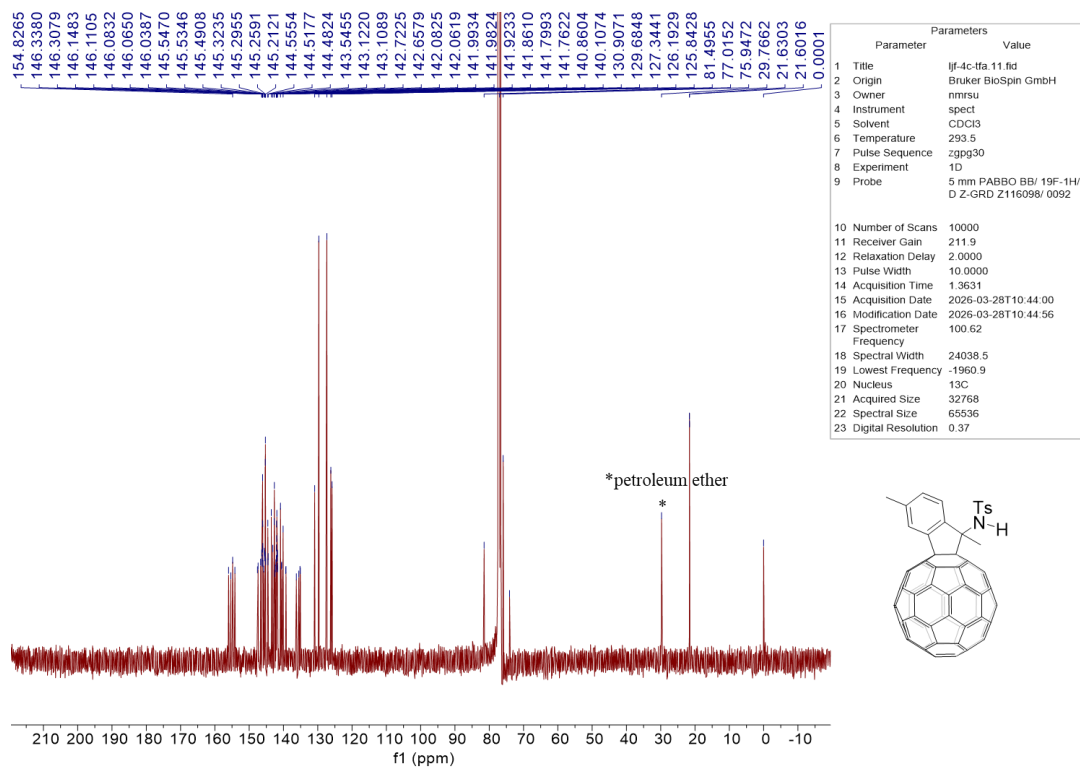

Fig. S67  $^{13}\text{C}$  NMR (101 MHz,  $\text{CDCl}_3$ ) of compound **3ha**.

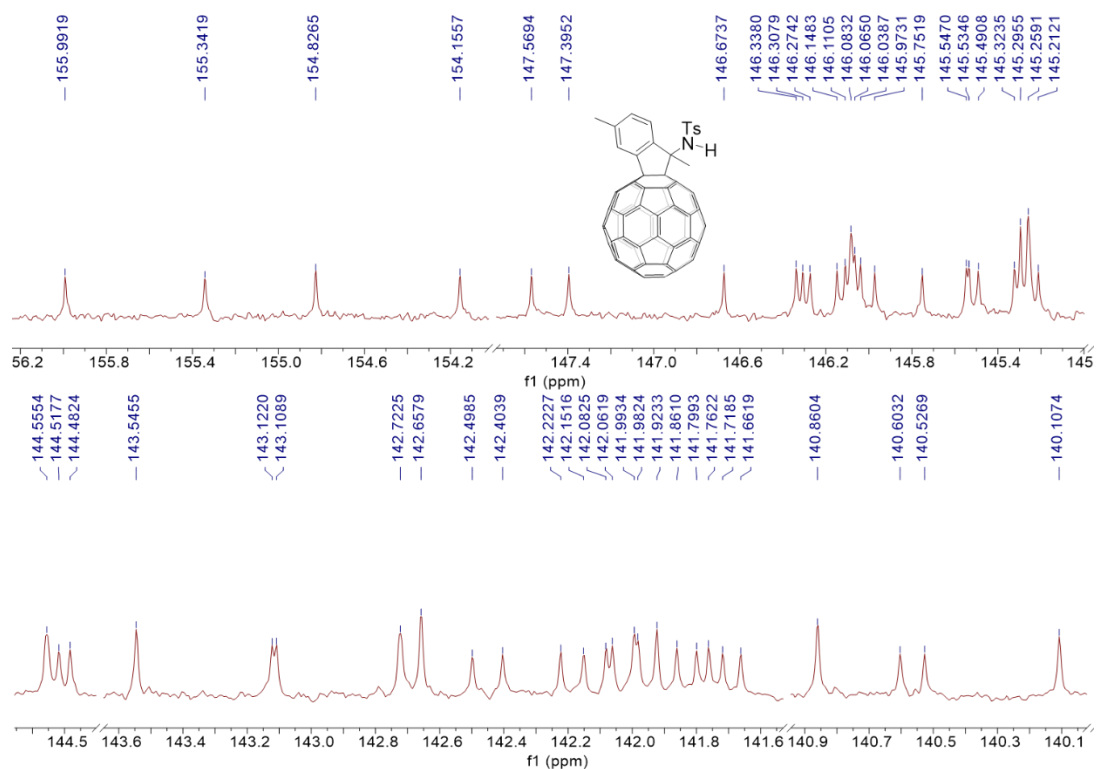

**Fig. S68** Expanded  $^{13}\text{C}$  NMR (101 MHz,  $\text{CDCl}_3$ ) of compound **3ha**.

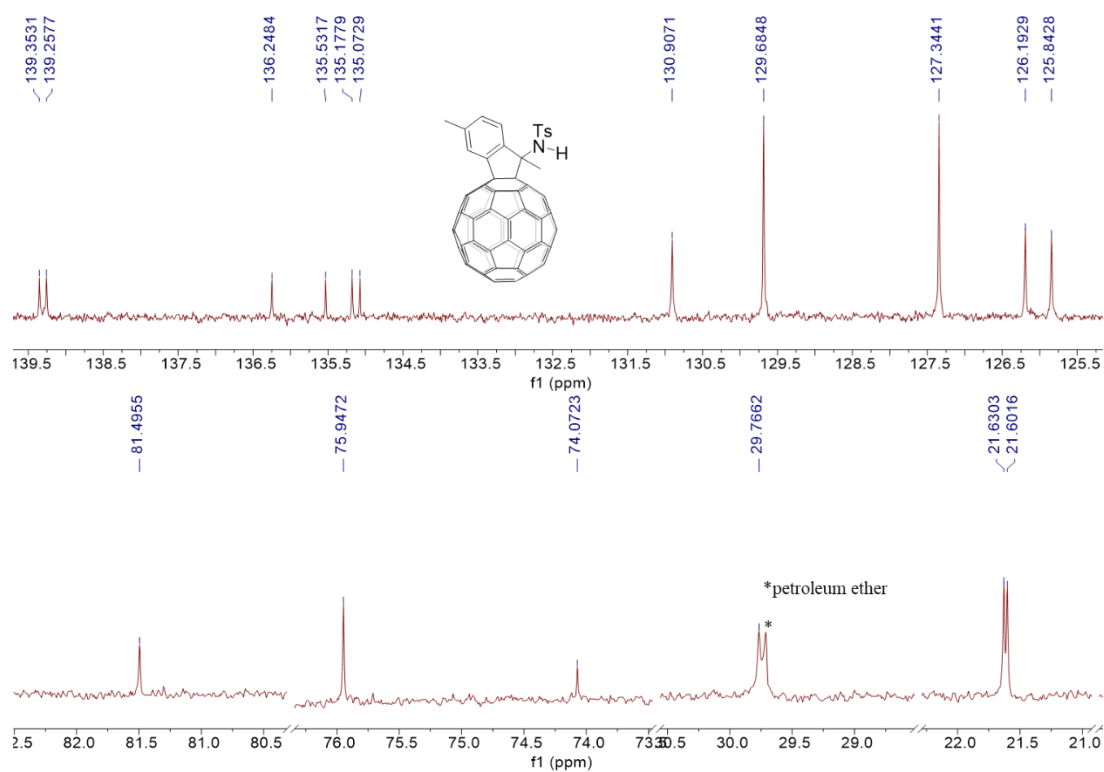

**Fig. S69** Expanded  $^{13}\text{C}$  NMR (101 MHz,  $\text{CDCl}_3$ ) of compound **3ha**.

## 7. UV-vis spectra of compounds 3aa–ha

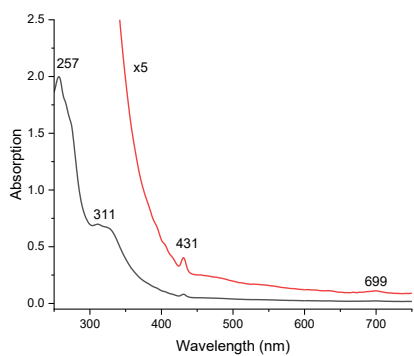

**Fig. S70** UV-vis absorption of 3aa

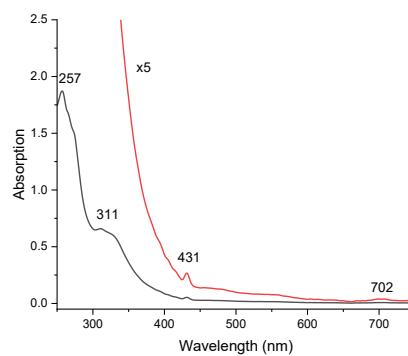

**Fig. S71** UV-vis absorption of 3ab

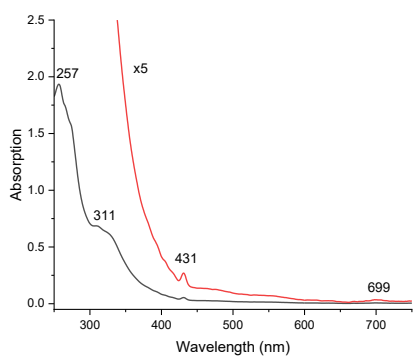

**Fig. S72** UV-vis absorption of 3ac

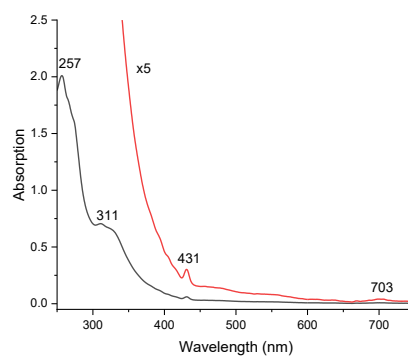

**Fig. S73** UV-vis absorption of 3ad

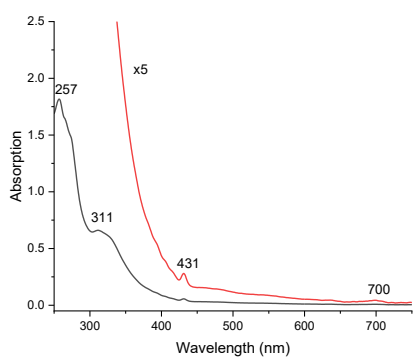

**Fig. S74** UV-vis absorption of 3ae

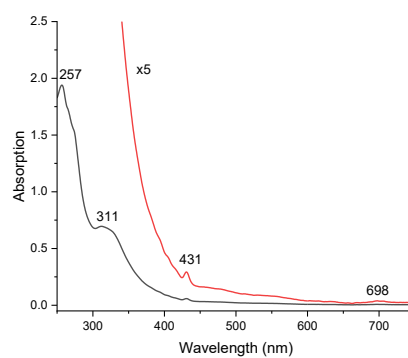

**Fig. S75** UV-vis absorption of 3af

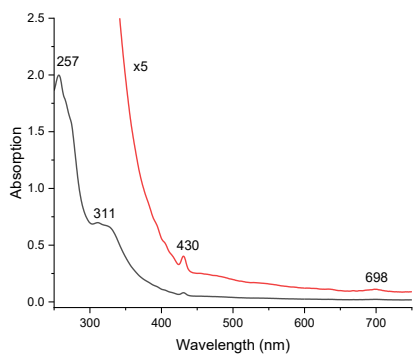

**Fig. S76** UV-vis absorption of **3ag**

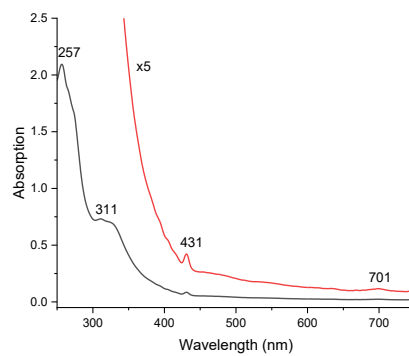

**Fig. S77** UV-vis absorption of **3ah**

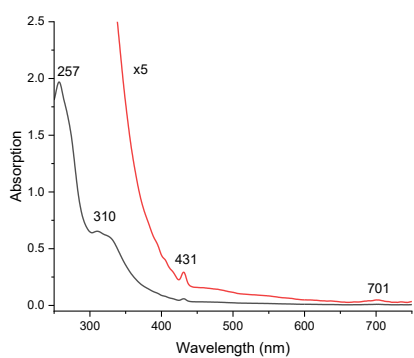

**Fig. S78** UV-vis absorption of **3bd**

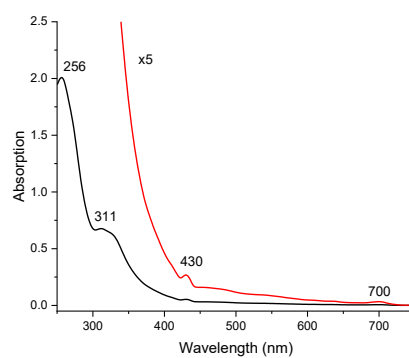

**Fig. S79** UV-vis absorption of **3cd**

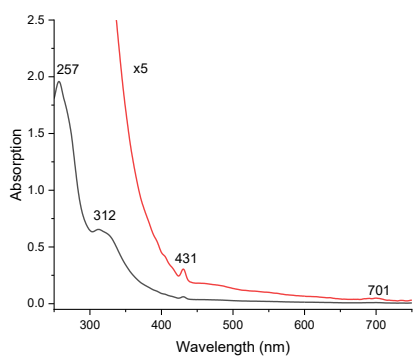

**Fig. S80** UV-vis absorption of **3dd**

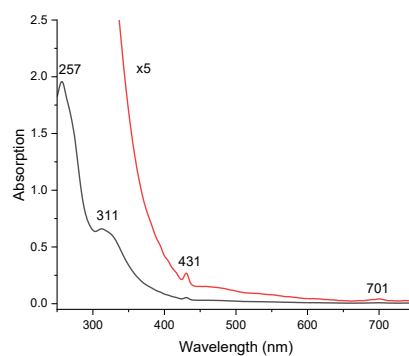

**Fig. S81** UV-vis absorption of **3ed**

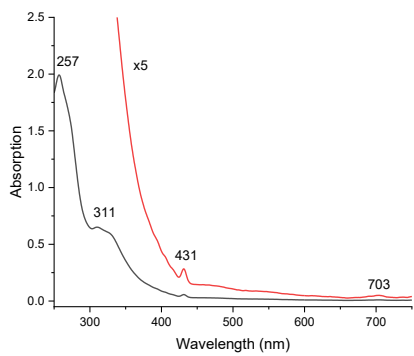

**Fig. S82** UV-vis absorption of **3fd**

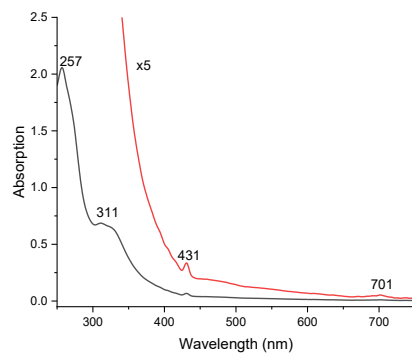

**Fig. S83** UV-vis absorption of **3gd**

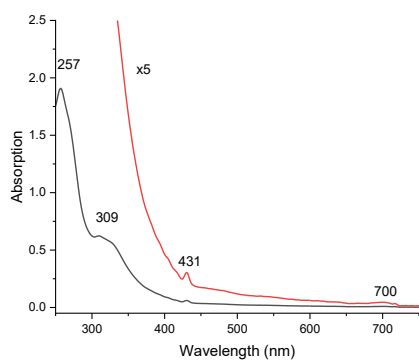

**Fig. S84** UV-vis absorption of **3ha**

## 8. Cyclic voltammograms and differential pulse voltammograms of compounds

### 3aa–ha

**Table S2** Half-Wave reduction potentials (V) of compounds **3aa–ha** determined by DPV<sup>a</sup>

| Compound   | $E_1$  | $E_2$  | $E_3$  |
|------------|--------|--------|--------|
| <b>3aa</b> | -1.152 | /      | /      |
| <b>3ab</b> | -1.148 | -1.536 | -2.060 |
| <b>3ac</b> | -1.136 | -1.520 | -2.040 |
| <b>3ad</b> | -1.140 | -1.524 | -2.044 |
| <b>3ae</b> | -1.144 | -1.532 | -2.060 |
| <b>3af</b> | -1.148 | -1.532 | -2.060 |
| <b>3ag</b> | -1.180 | -1.552 | -2.080 |
| <b>3ah</b> | -1.140 | -1.532 | -2.068 |
| <b>3bd</b> | -1.144 | -1.540 | -2.064 |
| <b>3cd</b> | -1.148 | -1.532 | -2.056 |
| <b>3dd</b> | -1.128 | -1.524 | -2.036 |
| <b>3ed</b> | -1.120 | -1.516 | -2.032 |
| <b>3fd</b> | -1.180 | -1.600 | -2.144 |
| <b>3gd</b> | -1.128 | -1.532 | -2.036 |
| <b>3ha</b> | -1.144 | -1.508 | -1.896 |

<sup>a</sup>Versus ferrocene/ferrocenium. Experimental conditions: 1.0 mM compound and 0.1 M TBAP in anhydrous 1,2-C<sub>6</sub>H<sub>4</sub>Cl<sub>2</sub>; reference electrode: SCE; working electrode: Pt disc; auxiliary electrode: Pt wire; pulse amplitude: 50 mV.

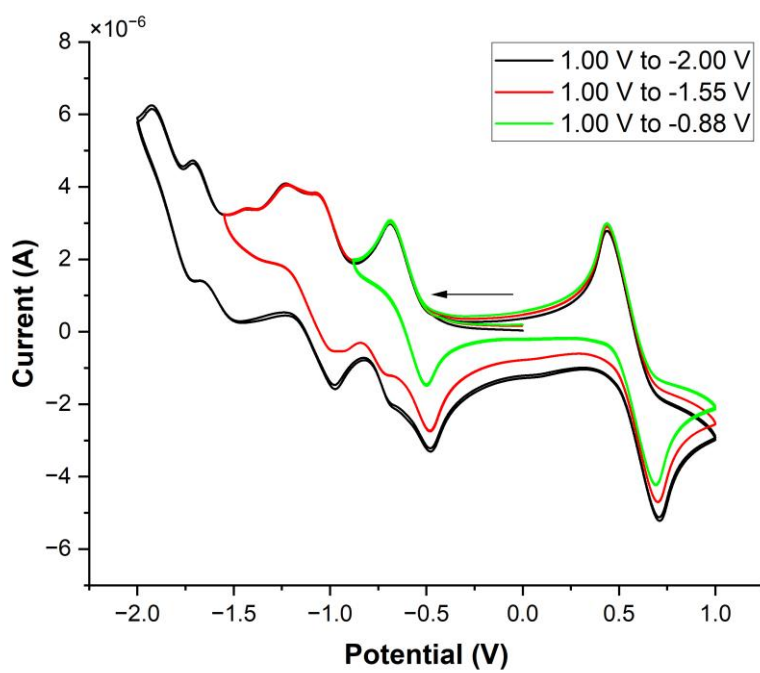

**Fig. S85** CV of compound **3aa**. (scanning rate:  $50 \text{ mV s}^{-1}$ )

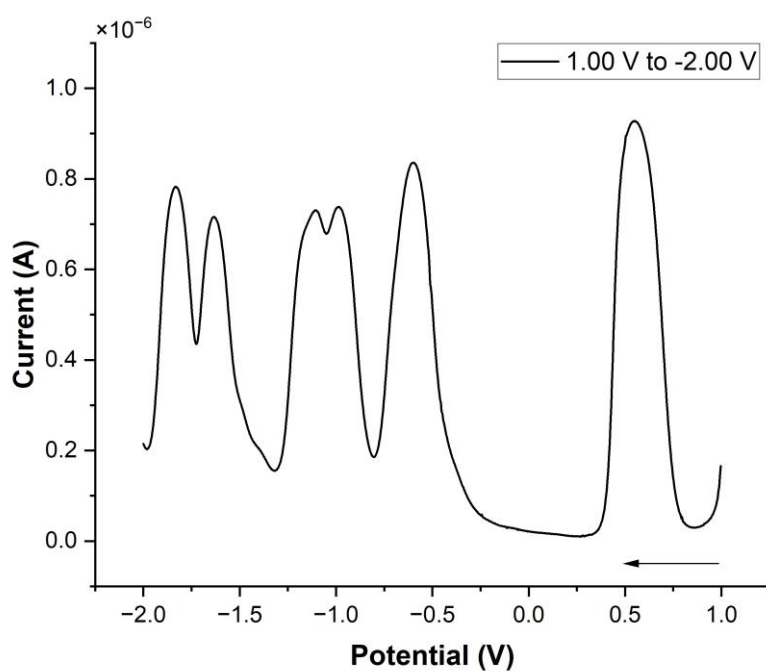

**Fig. S86** DPV of compound **3aa**. (pulse amplitude:  $50 \text{ mV}$ ; pulse width:  $0.05 \text{ s}$ ; pulse period:  $0.5 \text{ s}$ )

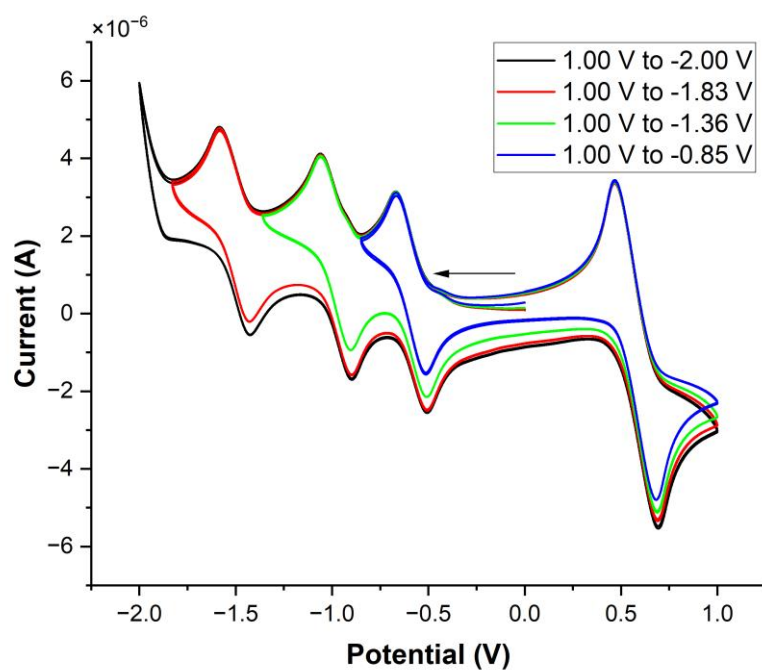

**Fig. S87** CV of compound **3ab**. (scanning rate:  $50 \text{ mV s}^{-1}$ )

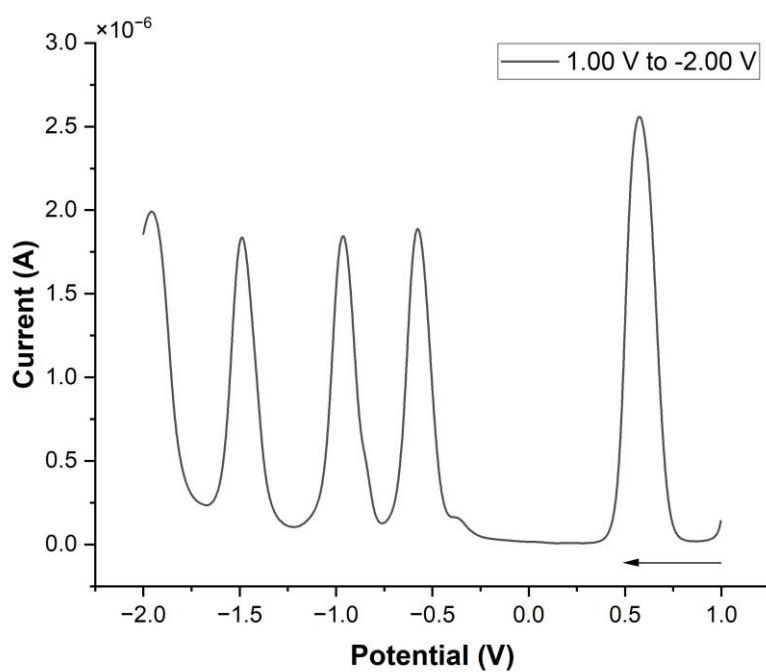

**Fig. S88** DPV of compound **3ab**. (pulse amplitude:  $50 \text{ mV}$ ; pulse width:  $0.05 \text{ s}$ ; pulse period:  $0.5 \text{ s}$ )

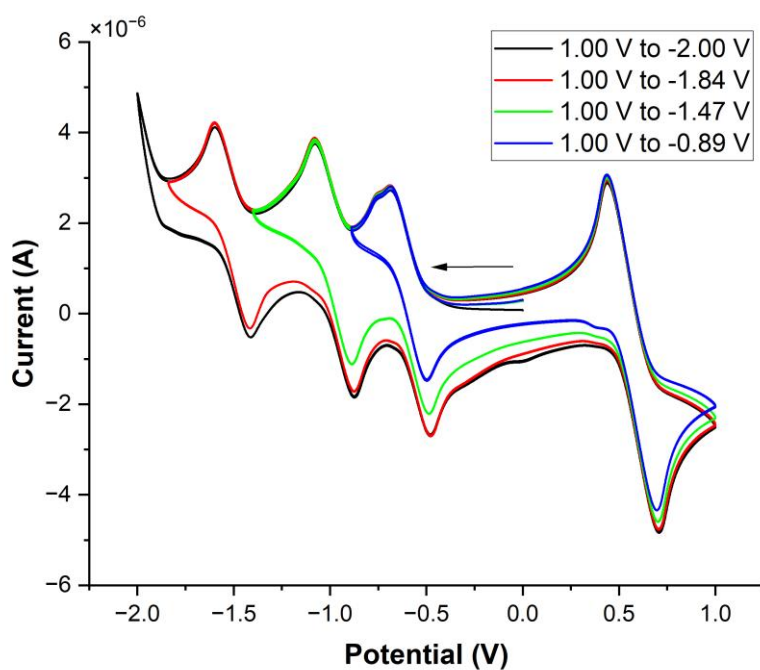

**Fig. S89** CV of compound **3ac**. (scanning rate:  $50 \text{ mV s}^{-1}$ )

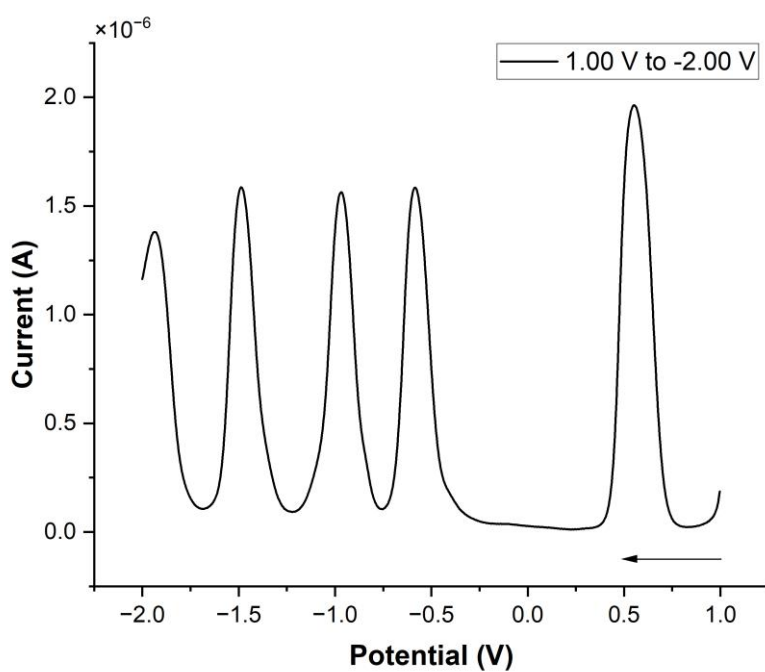

**Fig. S90** DPV of compound **3ac**. (pulse amplitude:  $50 \text{ mV}$ ; pulse width:  $0.05 \text{ s}$ ; pulse period:  $0.5 \text{ s}$ )

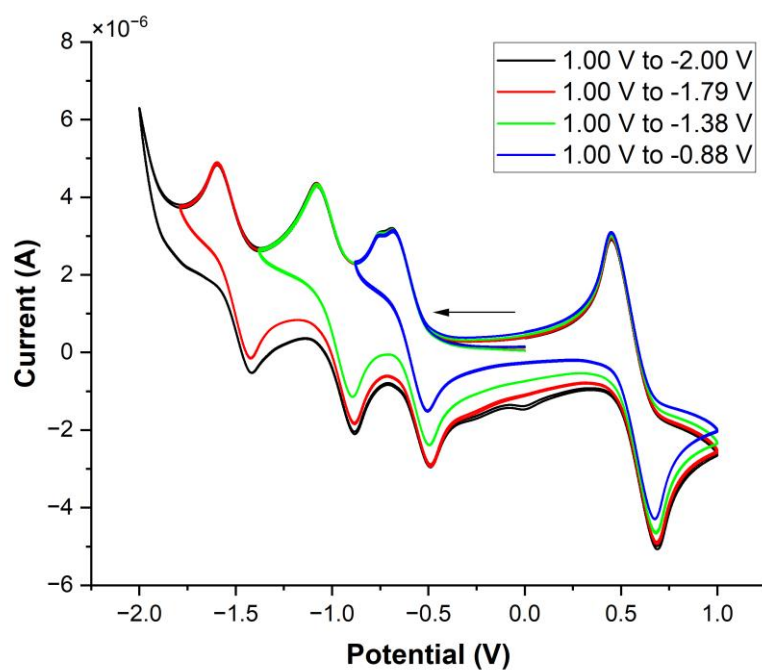

**Fig. S91** CV of compound **3ad**. (scanning rate:  $50 \text{ mV s}^{-1}$ )

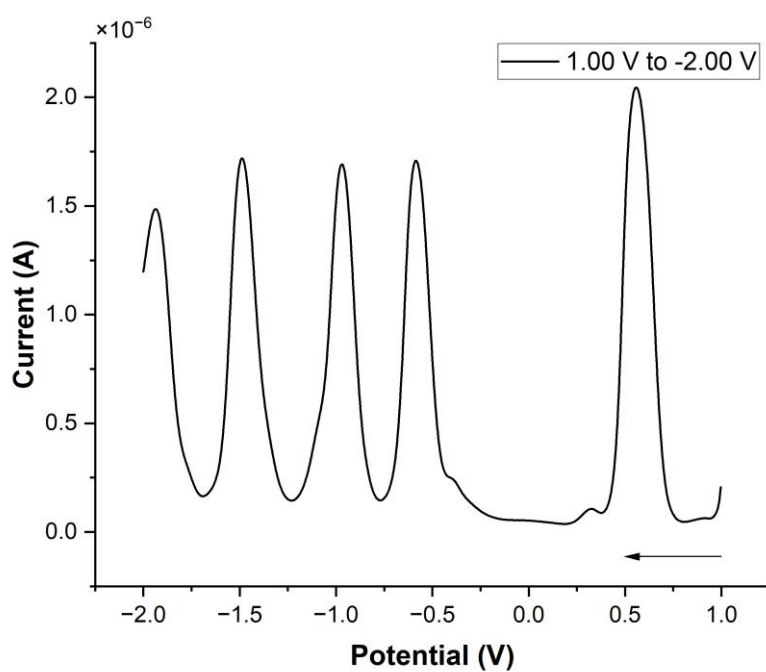

**Fig. S92** DPV of compound **3ad**. (pulse amplitude:  $50 \text{ mV}$ ; pulse width:  $0.05 \text{ s}$ ; pulse period:  $0.5 \text{ s}$ )

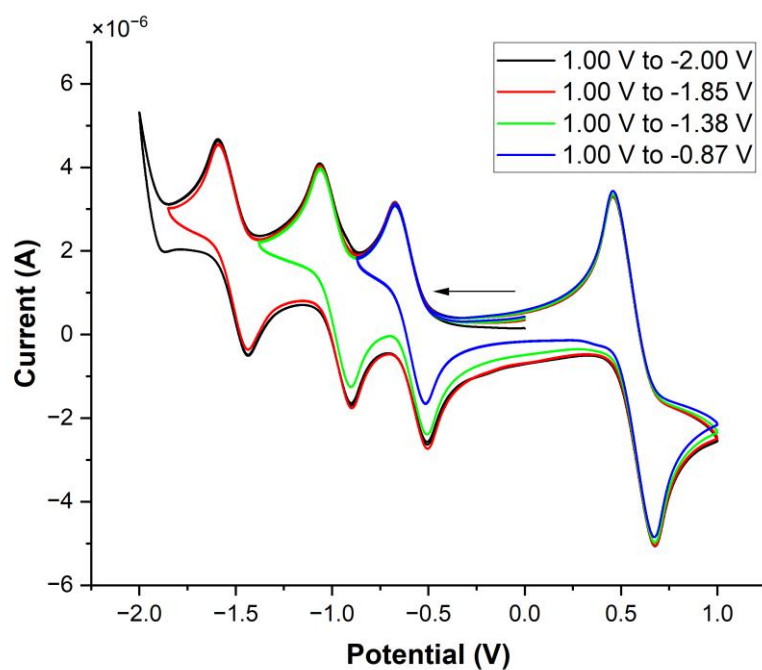

**Fig. S93** CV of compound **3ae**. (scanning rate:  $50 \text{ mV s}^{-1}$ )

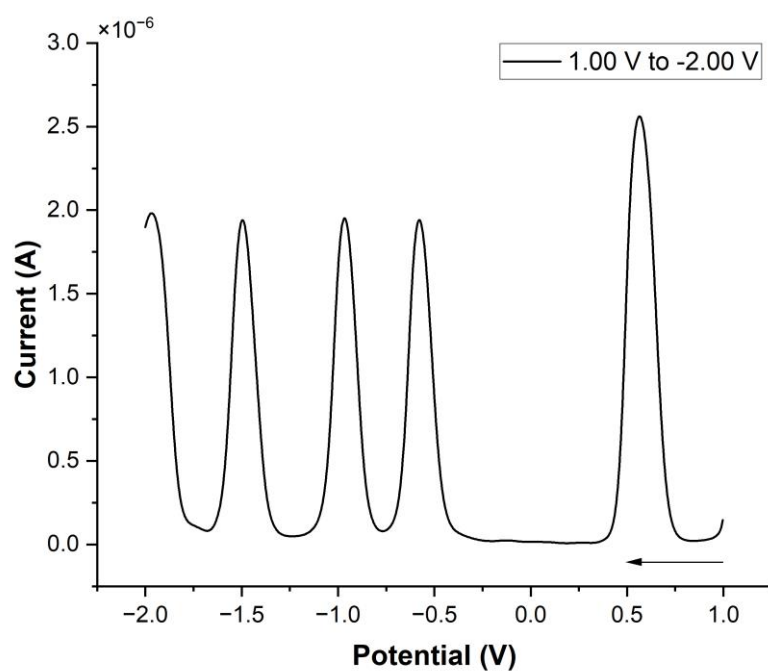

**Fig. S94** DPV of compound **3ae**. (pulse amplitude:  $50 \text{ mV}$ ; pulse width:  $0.05 \text{ s}$ ; pulse period:  $0.5 \text{ s}$ )

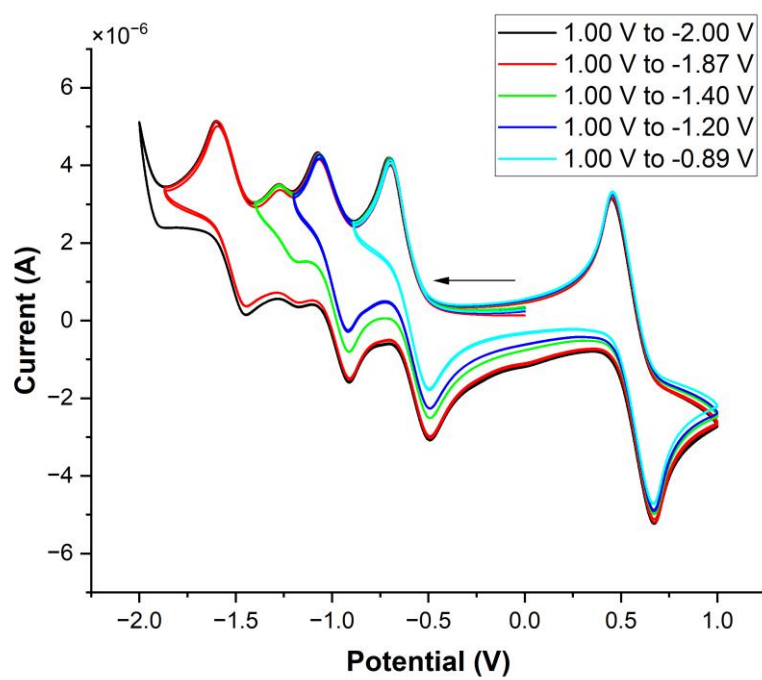

**Fig. S95** CV of compound **3af**. (scanning rate:  $50 \text{ mV s}^{-1}$ )

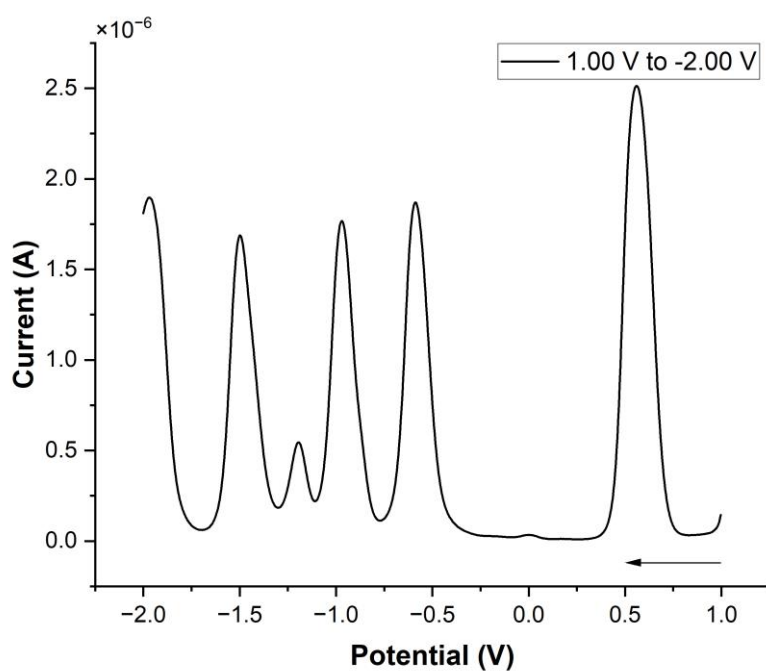

**Fig. S96** DPV of compound **3af**. (pulse amplitude:  $50 \text{ mV}$ ; pulse width:  $0.05 \text{ s}$ ; pulse period:  $0.5 \text{ s}$ )

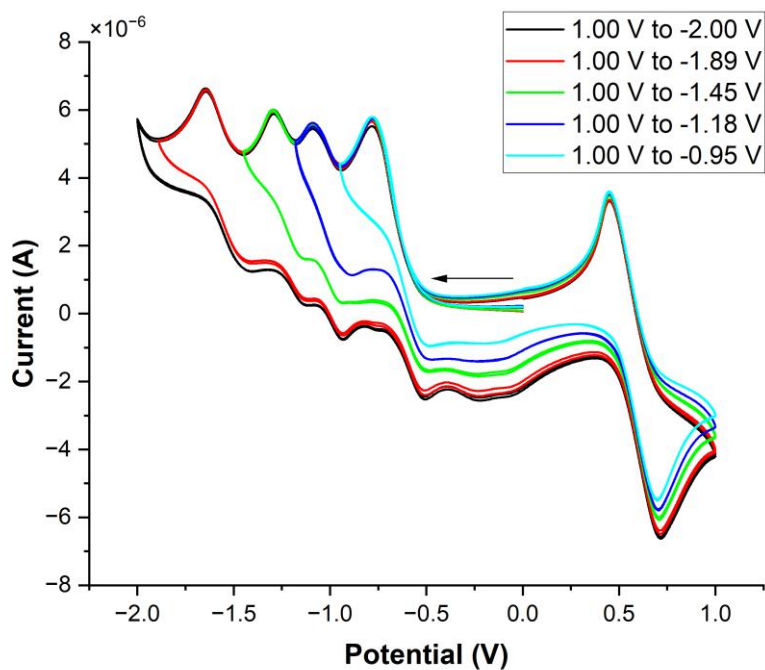

**Fig. S97** CV of compound **3ag**. (scanning rate:  $50 \text{ mV s}^{-1}$ )

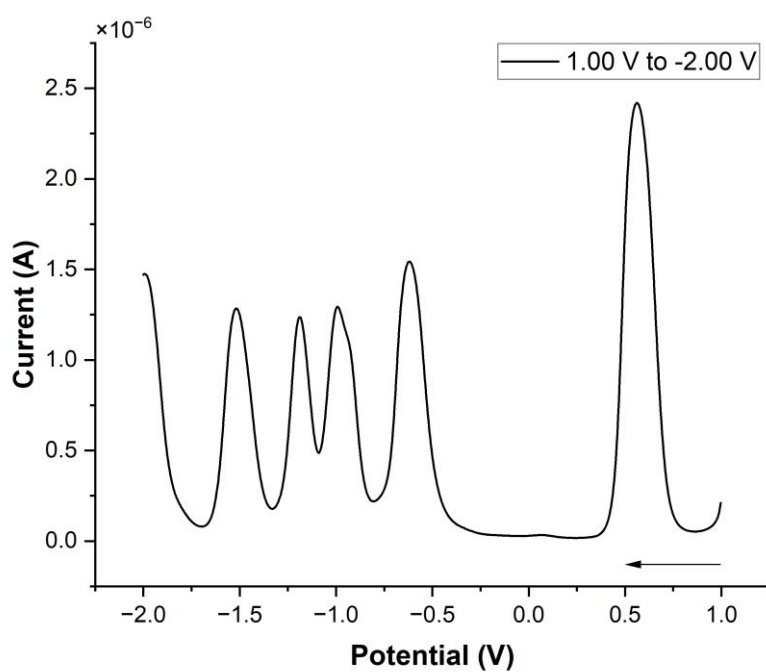

**Fig. S98** DPV of compound **3ag**. (pulse amplitude:  $50 \text{ mV}$ ; pulse width:  $0.05 \text{ s}$ ; pulse period:  $0.5 \text{ s}$ )

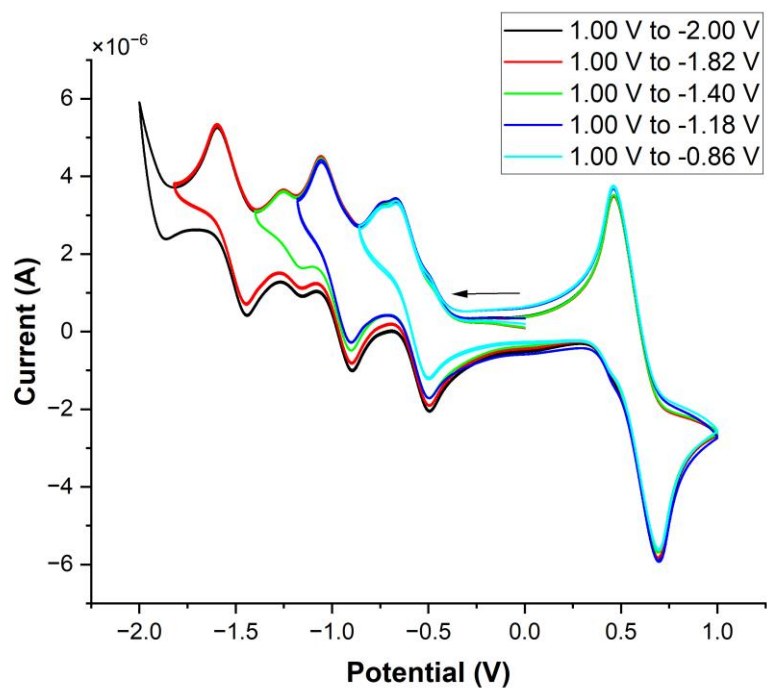

**Fig. S99** CV of compound **3ah**. (scanning rate: 50 mV s<sup>-1</sup>)

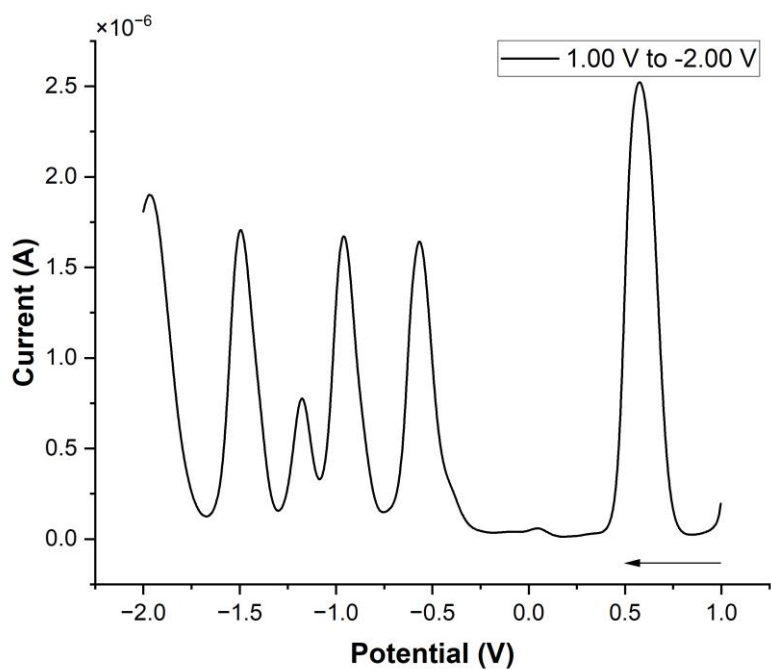

**Fig. S100** DPV of compound **3ah**. (pulse amplitude: 50 mV; pulse width: 0.05 s; pulse period: 0.5 s)

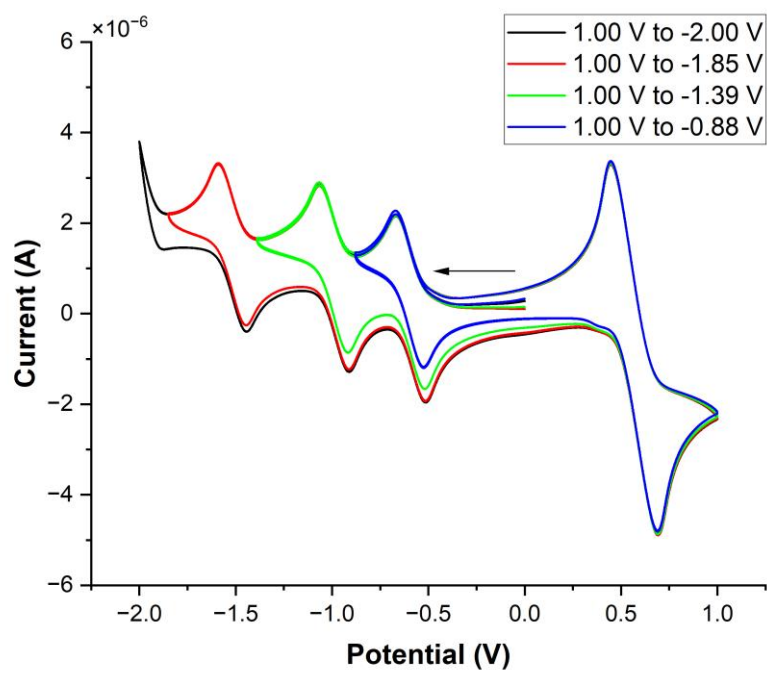

**Fig. S101** CV of compound **3bd**. (scanning rate:  $50 \text{ mV s}^{-1}$ )

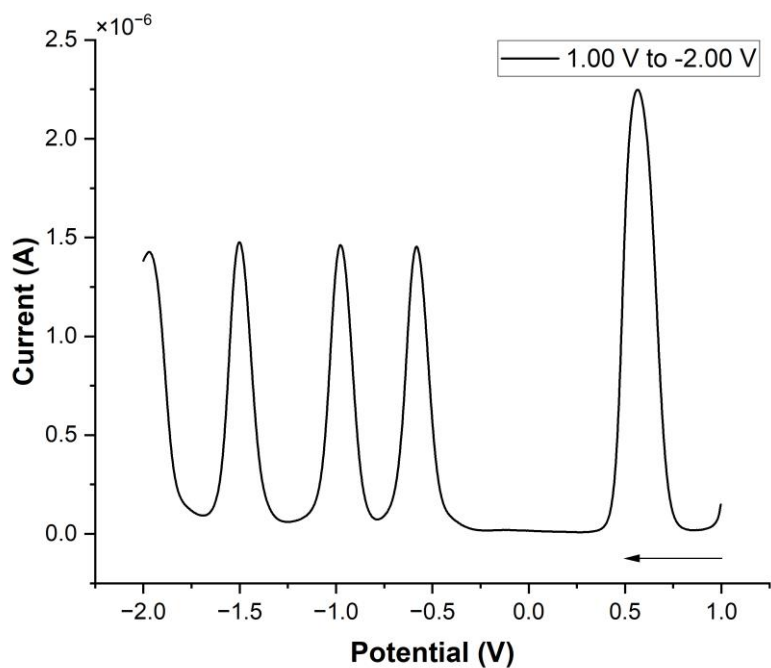

**Fig. S102** DPV of compound **3bd**. (pulse amplitude:  $50 \text{ mV}$ ; pulse width:  $0.05 \text{ s}$ ; pulse period:  $0.5 \text{ s}$ )

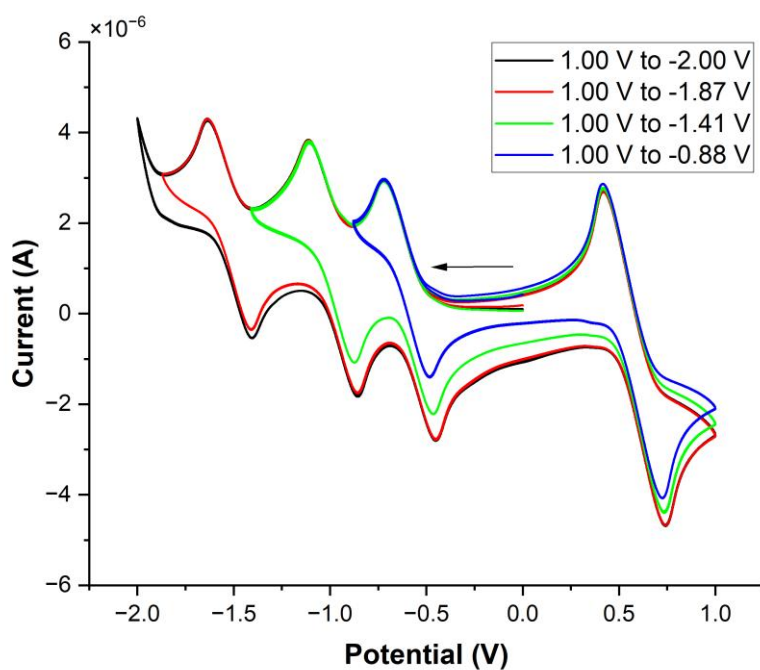

**Fig. S103** CV of compound **3cd**. (scanning rate:  $50 \text{ mV s}^{-1}$ )

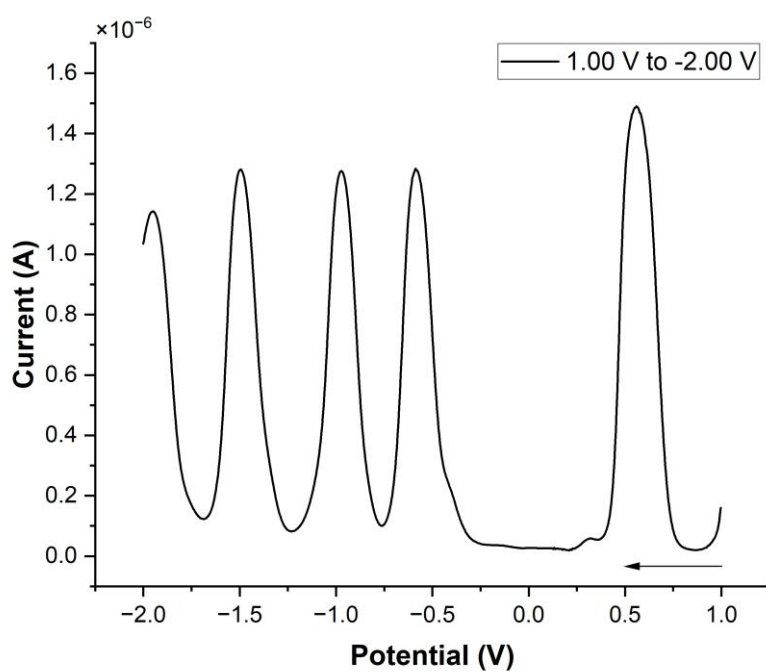

**Fig. S104** DPV of compound **3cd**. (pulse amplitude:  $50 \text{ mV}$ ; pulse width:  $0.05 \text{ s}$ ; pulse period:  $0.5 \text{ s}$ )

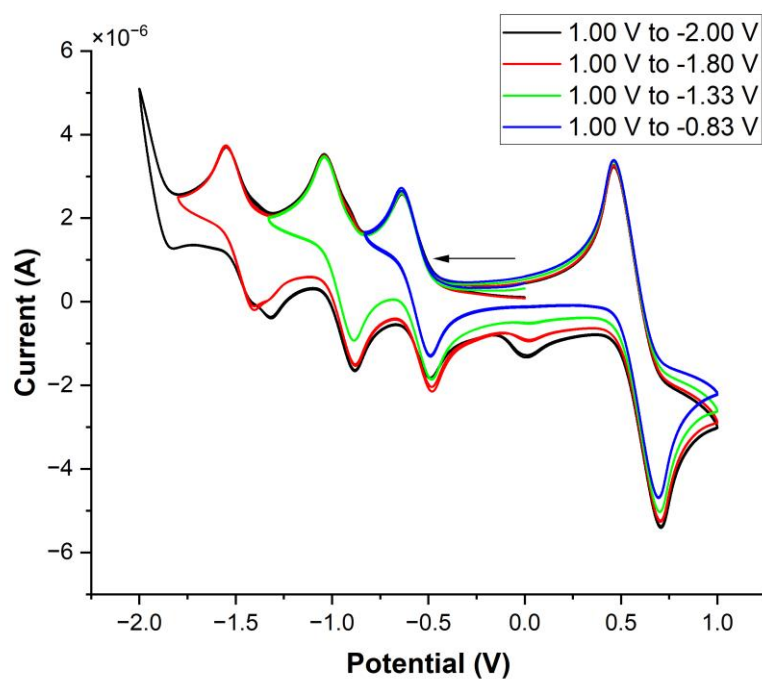

**Fig. S105** CV of compound **3dd**. (scanning rate:  $50 \text{ mV s}^{-1}$ )

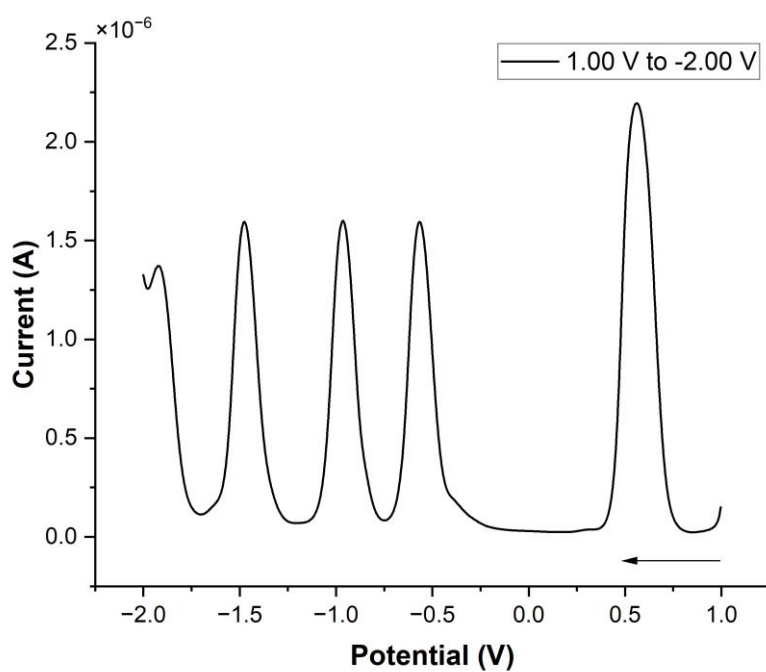

**Fig. S106** DPV of compound **3dd**. (pulse amplitude:  $50 \text{ mV}$ ; pulse width:  $0.05 \text{ s}$ ; pulse period:  $0.5 \text{ s}$ )

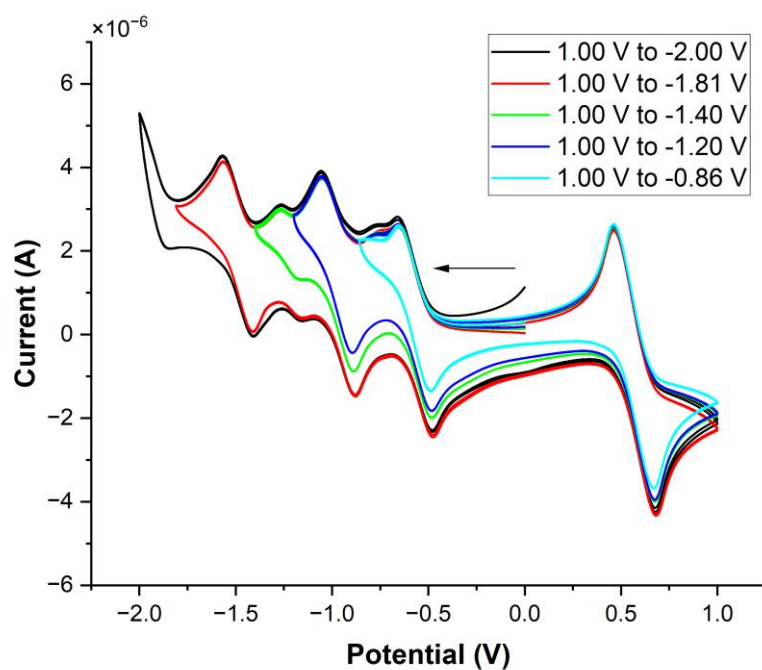

**Fig. S107** CV of compound **3ed**. (scanning rate:  $50 \text{ mV s}^{-1}$ )

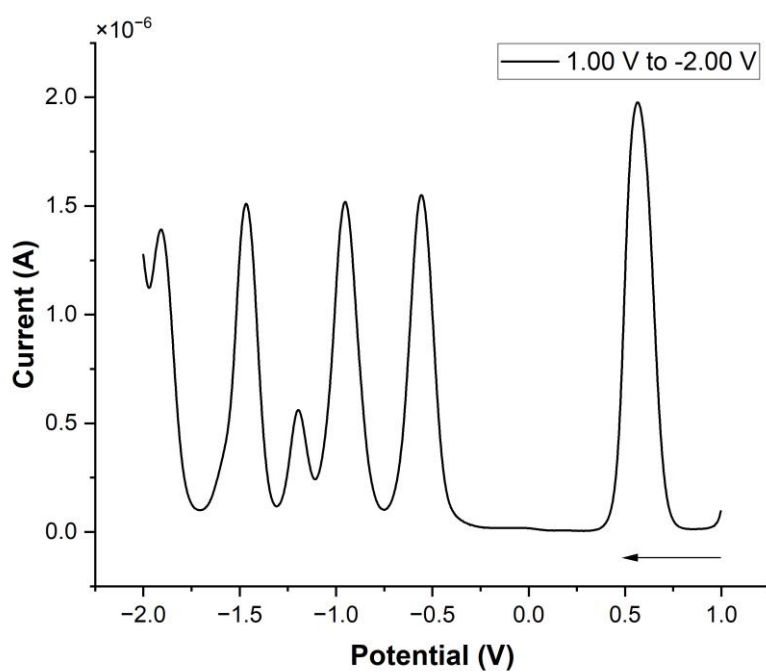

**Fig. S108** DPV of compound **3ed**. (pulse amplitude:  $50 \text{ mV}$ ; pulse width:  $0.05 \text{ s}$ ; pulse period:  $0.5 \text{ s}$ )

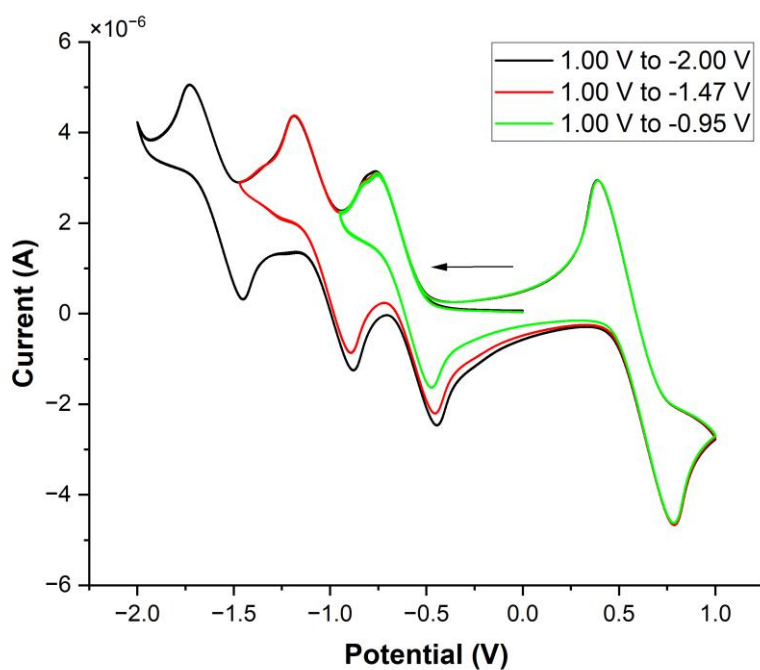

**Fig. S109** CV of compound **3fd**. (scanning rate:  $50 \text{ mV s}^{-1}$ )

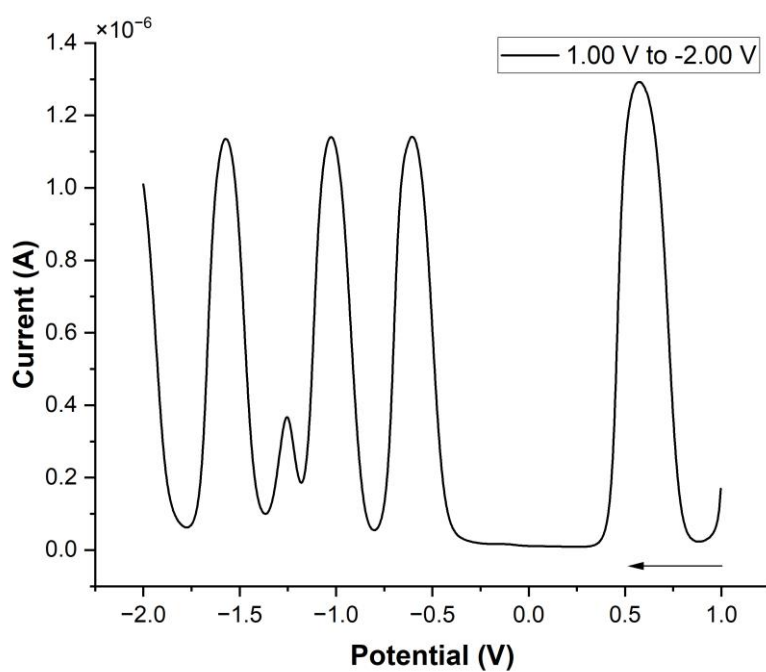

**Fig. S110** DPV of compound **3fd**. (pulse amplitude:  $50 \text{ mV}$ ; pulse width:  $0.05 \text{ s}$ ; pulse period:  $0.5 \text{ s}$ )

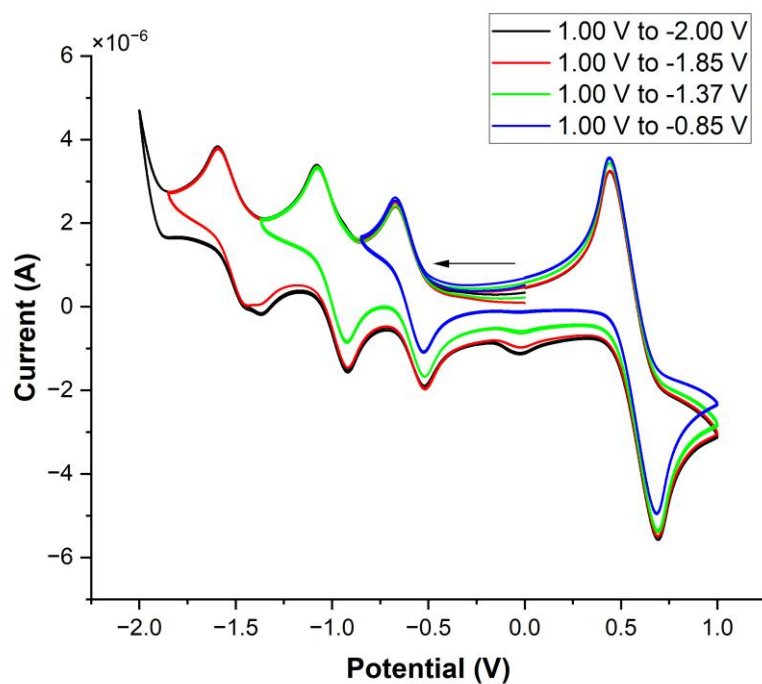

**Fig. S111** CV of compound **3gd**. (scanning rate:  $50 \text{ mV s}^{-1}$ )

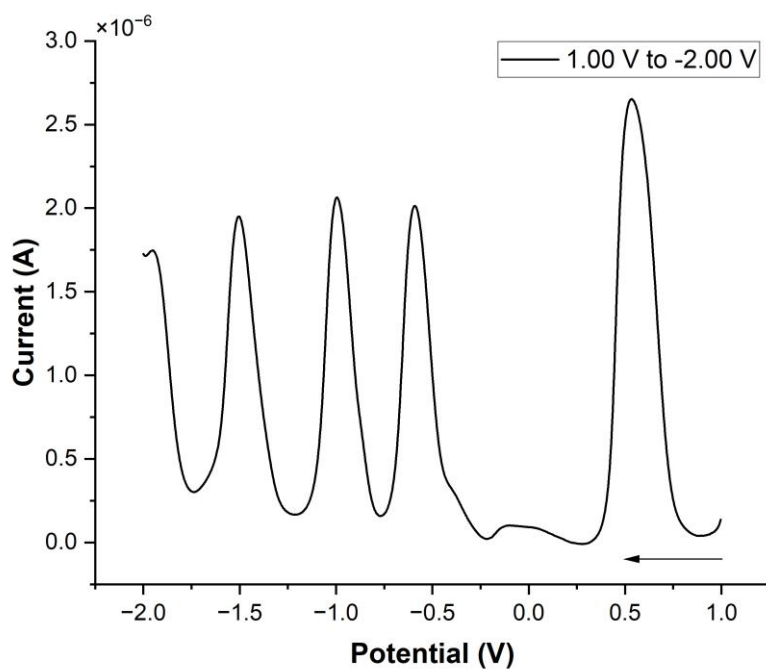

**Fig. S112** DPV of compound **3gd**. (pulse amplitude:  $50 \text{ mV}$ ; pulse width:  $0.05 \text{ s}$ ; pulse period:  $0.5 \text{ s}$ )

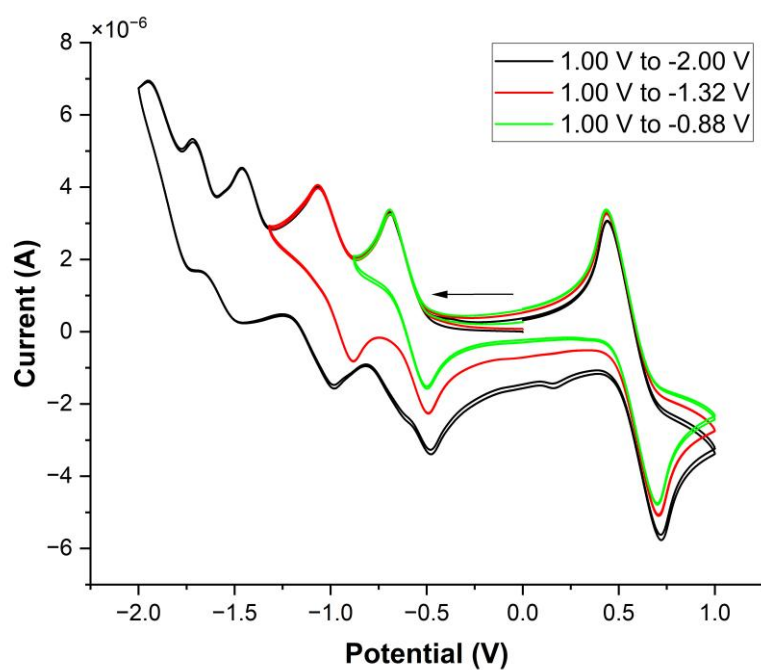

**Fig. S113** CV of compound **3ha**. (scanning rate: 50 mV s<sup>-1</sup>)

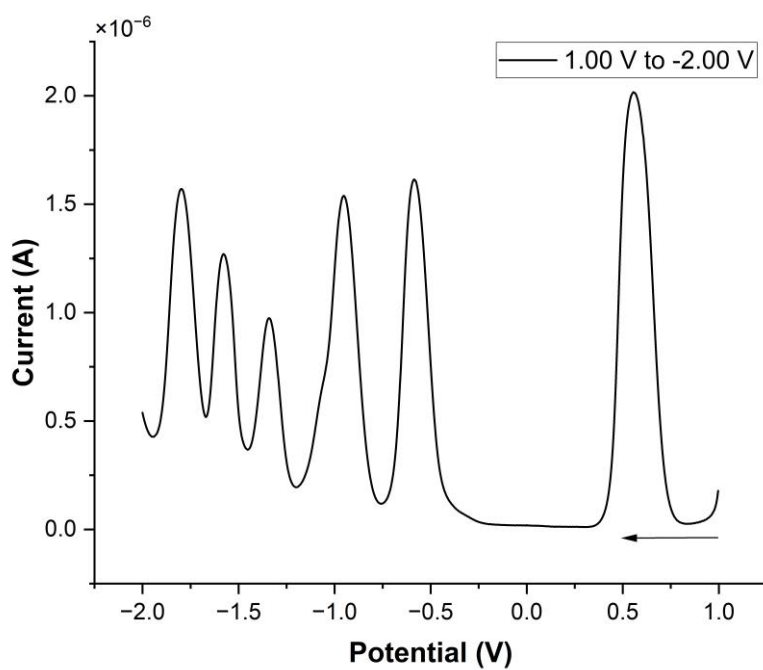

**Fig. S114** DPV of compound **3ha**. (pulse amplitude: 50 mV; pulse width: 0.05 s; pulse period: 0.5 s)

## 9. Device fabrication and photovoltaic parameters

Pre-patterned indium-doped tin oxide (ITO) glass substrates were cleaned by sequential sonication in glass detergent, deionized water, acetone, and isopropyl alcohol for at least 20 min each, followed by drying under a nitrogen stream and ultraviolet-ozone treatment for 15 min. A PEDOT:PSS layer was spin-coated onto the ITO substrate (4500 rpm, 30 s) from an aqueous dispersion and annealed at 150 °C for 15 min in air. The active layers were prepared from chloroform solutions (15 mg/mL total concentration) containing either a binary blend of 5-(5-(4,8-bis(4-chloro-5-(2-ethylhexyl)thiophen-2-yl)-6-methylbenzo[1,2-b:4,5-b']dithiophen-2-yl)-4-(2-butyloctyl)thiophen-2-yl)-8-(4-(2-butyloctyl)-5-methylthiophen-2-yl)dithieno[3',2':3,4;2'',3'':5,6]benzo[1,2-c][1,2,5]thiadiazole (D18-Cl) and 2,2'-((2Z,2'Z)-((12,13-bis(3-ethylheptyl)-3,9-diundecyl-12,13-dihydro-[1,2,5]thiadiazolo[3,4-e]thieno[2'',3'':4',5']thieno[2',3':4,5]pyrrolo[3,2-g]thieno[2',3':4,5]thieno[3,2-b]indole-2,10-diyl)bis(methaneylylidene))bis(5,6-difluoro-3-oxo-2,3-dihydro-1H-indene-2,1-diylidene))dimalononitrile (N3) (1:1.4 by weight) or a ternary blend of D18-Cl, N3 and fullerene (1:1.4:0.05 by weight). Each solution was stirred at 65 °C for 2 h. Then, the above active blend in chloroform was spin-coated onto the PEDOT:PSS layer. *N,N'*-bis[7-(dimethylamino)-4-azaheptyl]-3,4,9,10-perylenetetracarboxylic diimide (PDINN, 1 mg/mL) in MeOH solution was spin-coated onto the active layer (3800 rpm for 30 s) as the electron transfer layer. The fabrication of all layers was carried out in a nitrogen-filled glove box (Mikrouna Co., Ltd.). Ag (~100 nm) was evaporated onto PDINN through a shadow mask (pressure ca.  $3 \times 10^{-4}$  Pa). The effective area for the devices was 4 mm<sup>2</sup>. Current density-voltage (*J-V*) were measured using a Keysight B2901BL source meter coupled with a xenon-lamp solar simulator (Enlitech, AM 1.5G, 100 mW cm<sup>-2</sup>). The light intensity was calibrated with a certified Si reference cell (SRC-2020, 2 cm×2 cm, Enlitech).

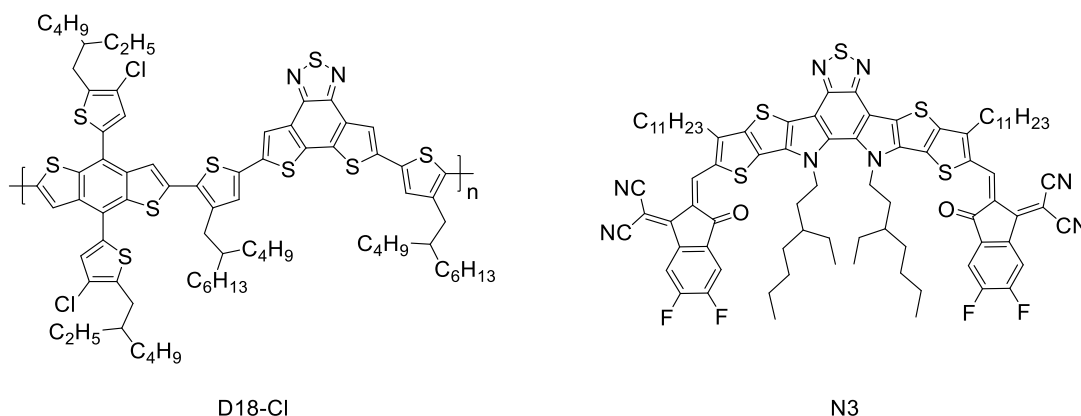

**Fig. S115** The structures of D18-Cl and N3.

**Table S3** Photovoltaic parameters for organic solar cells.

| Active Layer          | $V_{OC}$ (V) | $J_{SC}$ (mA cm <sup>-2</sup> ) | FF (%) | PCE (%) <sup>a</sup>    |
|-----------------------|--------------|---------------------------------|--------|-------------------------|
| D18-Cl:N3             | 0.878        | 27.15                           | 74.42  | 17.75<br>(17.72 ± 0.03) |
| D18-Cl:N3:PCBM        | 0.886        | 27.41                           | 74.09  | 17.99<br>(17.87 ± 0.12) |
| D18-Cl:N3: <b>3ah</b> | 0.882        | 27.37                           | 76.38  | 18.44<br>(18.23 ± 0.15) |

<sup>a</sup>The average values in parentheses were calculated from 5 individual devices.

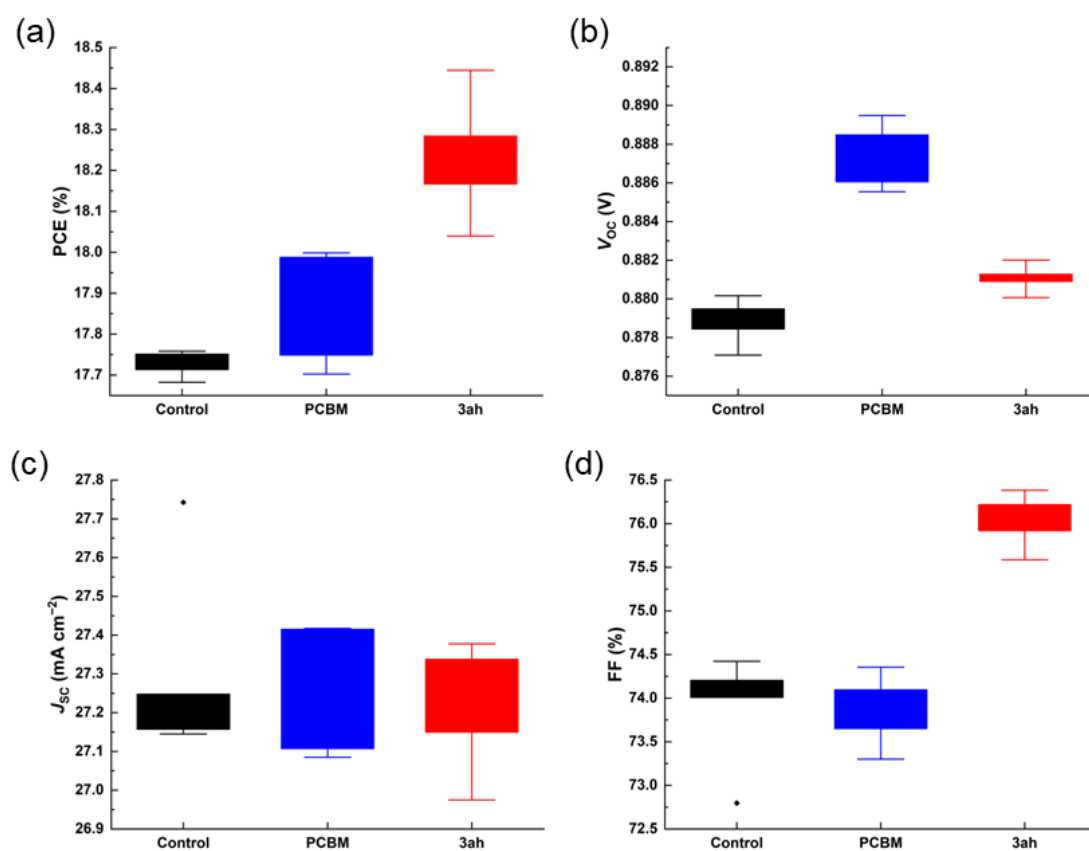

**Fig. S116.** Statistical distributions of photovoltaic parameters for OSCs based on D18-Cl:N3 (black), D18-Cl:N3:PCBM (blue) and D18-Cl:N3:**3ah** (red). (a) PCE, (b)  $V_{OC}$ , (c)  $J_{SC}$ , (d) FF.

## 10. References

- 1 Y.-T. Su, Y.-L. Wang and G.-W. Wang, *Chem. Commun.*, 2012, **48**, 8132–8134.
- 2 Y. He, H.-Y. Chen, J. Hou and Y. Li, *J. Am. Chem. Soc.*, 2010, **132**, 1377–1382.
- 3 J. G. Wijmans and R. W. Baker, *J. Membr. Sci.*, 1995, **107**, 1–21.
- 4 T. Johnson and S. Thomas, *Polymer*, 1999, **40**, 3223–3228.
